# Supplementary material
Source: MDPI journal article supplement (https://www.mdpi.com/2311-7524/8/11/985)
Supplement: s1 [file s1]

Appendix S1. The nucleotide and amino acid sequences of identified 22 SIRBZ genes download from SOL Genomics Network.

>SIRBZ1

ATGGATTCTGATCATGAATTTTACGATATGTATTCTGCTGATGAAGAGGAAGATTCCA  
ACAATGTTGATGAATCCAATATAGTTACTTACGAACAAAAAATTACAAAATTTTGA  
AGGATTTTCGATATTCGTCAGCTCGTAAAAGAAGATATATCGAAAATCTCAGCCATCTT  
ATCCGTCCCACGGGACGTTTCGTTAGCACTCCTACGTCGTTATAATTGGAAGGTTGAT  
CGAGCTAACGAAGAATGGTTTGCTAACGAACAAGAAGTTCGTAAATCTATAGGTATG  
TTTTTATGCGATAACGATAATAATAACTACGTTCCAGTGTGAAAAAATCGAAAAAG  
AATGATAATATTGTGAATTGTGGTATATGTTTTGAGGAATACAATGATGTGGTTTATG  
CCACGTGTAGAAAACATCCTTTTTGTAAGTTATGTTGGGAAAAATATATTGGTGCATC  
GATTAATTATAGTGGCCCTAATAAATGTCTTGCTTTACGATGTCCCGATCCATCGTGT  
GAAGCTATGGTAGGTGAAAGTATAATAGTTGAATTAGCATCGGAGATAGATAAATCG  
AAATATTATGATTATTTATTTTCGATCGTATATCGAGGAAAATAAGAAGACTAAGTGGT  
GTCCTTATCCGGGATGTGAATGTGCTATCGAATTTGAGATAGGGAGCGACGATTATAG  
TGTGATTTATTCAAATTGCGATATGGTAGCTAAGTGGAAGTATGTAAATGAAGAAGA  
ATCCGCAAATACAAATTGGTTTAGGACTTTCACTAAAAAATGTCCAGAGTGTGATAG  
ATCAATCGAAAAAATATGGGATGTATGCATATGACATGTAGATGTGGATATCAATT  
TTGTTGGTTATGTTTTAAAGAATGGGGTGTGTTGTGCTAGTCGATGCAATCGATACGAG  
GAGAAAAAGAAGTAACGAACGCGAAGAAGAAGATTGAAAGGTATACACATTATTA  
CGAGAGATGGTTATCGAATGGAAAATCGAAAGATAAGGCTCTGAATGATTTGAAGGA  
GATGAAAGAGGAAGGGTTGAAAAAGTTGAGTGACGATAATTCGTTACACAAGGAAG  
AATTAGGGTTTATTATTGAAGCTTGGAAGCAAATCGTCGAATGTAGGAGGGTTTTGAA  
ATGGACGTATGCTTATGGATTTTATTTACCTAAAGAAGAAGAGGCGAAGACACAATT  
TTTCGAGTACTTGCAAGGGGAAGCAGAGGCGGGTCTAGAACGACTTCATCATTGTGT  
GGAGAAAGACTTGATGAAACATTTAGGGTCAGATGAGATGGACTATACTGATAAAGG  
ATCTTATAAGAAATTTGCTAATTTTCGATCGAGAGTTATTGGGCTGACAAAAATTACT  
CGAAATTATTTGAAAAATTGGTCATGGCATTAGAAAATGGACTAGAAGATGTGACT  
AATAATCCAACAAAAAAATTGAACAACCAATGAGTAGTAATAGCACAAGCAATAA  
TATTATGTGGATGTGTGATAGGTGCACATTTTTGAATGAAGATATTCATACAGTTTGT  
CAAATGTGCATTGAAGATTGA

>SIRBZ2

ATGCTCGTCAAGGGAAGAGCTGAGAAAATTATGACCCTCATGAGAACTAGAAATGGA  
AAACAACCTAGCACTAACAGCACTGCAAGCTCGAAACATATCTTAGTTCTTGGTGA  
GGACATACGGCTAGGGCCAATAATCTTGATATAAGAGAAGACAACACTGTGAGAACA  
TCAAAAAGTCCATTTGAAGCTTGGGGCGTCAAATTTATGGAATCAAAAGAGAAACCT  
GTAGCCACAAGGAGTTTTACTTTGGGCCCACAATTTTTACAAAGAGCTGGGGTGAAC  
AGCACAACCAGCTCGAGTAATTTACAGCTAGCTGGGGGCAGAAAGTTAATCAACGTT  
GGAGGGGGCAGTGTGAAAACTTGGCAAATGCGCATGTGGATGGAAGCGACAACT  
CACACTGTCTAAAACTCCACATGTGCCGGGAAGCGACAACCTCACTGTGTCTAAAC  
TCCACATATGGCTGGGATGAGCAGCACAACCAGCTCGAGTAATTTACTGCTAGCTGG  
GGGCAGAAAGTTAATGAACATTGAAGCAGGCAGTGCGAAAACTTGGCAAGTATAC

ATGTGGATGGAAGTAACAATCTCACTATGTCTAGAACTCCACATGTGGCTGGAAGCA  
ACAACCTCACTCTGTCTAAAACTCCACATGTGTTGGATGACAATGATTTAGGAGAGGC  
ATCTTCTGCAACAGGAGCATCATTAACACAAAAAGTTTATTGCTGATTTTGAAGGTTGG  
GCATGTGATTCATGCACATTTCTGAATGCTGACTCTACCACAACATGCCTGATGTGCA  
GTGAAGATGCTTCTGGCAGTTGGGAATGCGAGAAGTGTACGTTTCTCAATAAGAAGC  
ATGCTTCCACATGCCAAATATGTGAGCACCGTAAATGA

>SIRBZ3

ATGGCTTCGAGGTTTCATCTCCCTCCTCGGAACTCCATTTCCCACATTCCTCAATCACCT  
ACGATGCCCCCTCTTTCCTCCATCTTCGTCGTTTGGCATGCGGTTCTCGTCGCTTCACAG  
CCTACAGTCACCCCCACATATCTCCTCTTTCACCCTCTCAACAACAATTCCACGCCCCA  
ACCCATCAATAATAACACCCCCTCGACTCTTCTTCTTCTTCTTCTTCTTTACCTCTCA  
CCCTTGGCCTGAATGGCGTAGCTTAATTACTCTTCTTACTGGCAATGACCAGCTACCT  
CCTGCAGTGGAGGACTCTGACTCCTTCGTCACATACGAGGAGTTGTCCCAAGACTTCC  
TTCGTGCTGCTACCTCTGCTTAGATTTTGCACGGGAGCGCCCAAATTTTCATAGGGTT  
GCTTTCAAGGAGGGATATTGAGGCTGTTGTATCAAATGGGACACCATTTTGTTCAAA  
GGTGCTCTGGAAACGGCAAGAAGAATGAGGGCATTCTTGGGTATTGACGGGAGCACT  
GTGCTGGATCATGGCAACGCTAACACGGTTGATCTCATGAAATACATATTATGTTACG  
CGAGTAAACCTCTGTTTCTTCAGAAAAAACTCCCTCTATAGCAGGGACCTTATAGA  
ATCATCTTGCCGGAGTCTTTTGCCTGAGTTGGTTGAAGTGAGCTGCGGAGCTCCAGCA  
GTCAACCTGCCTCCTGCAGAGCAATATGATTTTTTCAGGTAGATATGGACAAACACCA  
AGGCCTATTAGACAAAATATTGTAATGAAGAGAGGCGACTGGATATGTCAAAAGTGC  
AATTTTCATGAACTTTGCAAGAAACAACAAATGCCTTGAATGTGAGGAACCTAGACCA  
AGGAGACAGCTGACAGGCGGGGAGTGGGAATGCCCTCAATGTTATTTCTTCAACTAT  
GGGAGAAATGTTGTCTGTCTGAGATGCGACTTCGGACGACCAGCTGGGGCTTCACCT  
AGAACTACCCACTCCAGTGCGGAGGATGGGTATAATGGGAACTCTGCGTATTCAAAT  
GGAATGGATCTTAAGTTGGCTGAGAATGAGGAGAAGGCACAGCGGTGGTTTTCTAAG  
ATTTCTCAGATGAAGAATGCCTCTGATATGGATAGTGCAGCAGCTGACGAAGACTTC  
CCTGAAATAATGCCACCGAGGAAAGGAGAAAAATAAGTTTGTGTTAGCACAAGGAAA  
ACACCCTTGGAAGGAGGTTGGCCAACACTCAGTACGAAAGAACTTTGGTTACAAT  
GGTATCCCAGAAGGCAACACTTTGACTGGTGGTGCACATAGTGTCCCTGCCACGTCAA  
TGAAGCAGAATATGGATCAAAATTCTGGAACAAGTCATAAGGGCGTTGCTGCAGACA  
AAAATAGCGAGTCGGTCATTCAACATAGTGAAGAGGTTCTAACTATGTTCCCTTTTGT  
GCCATTACCAAAAAGACATGTTTCAGAAAAATAATCCAACTTCAGTGATGGATGAGAA  
AGTAAAGGAAGAAGTTGGTGTCTCTCACACTCCTGAGGTCAGTCACCAAACATGTTT  
AGCAAGTCTTGGCAATGACTTTGGGAAGTCCATGGAGAAGTTCCAGTCAAATGATCT  
ACTCAGTGAGGAGAAAGAGAGAGAACAAGCTGAGAAGTCAGAAAGTTGGTTCAAGA  
AAATCGCGGAGCTGCATGATGTCAAAGACTTATCGAGTTCCATCTCCGATGATGACTT  
CCCAGAGATTATGCCAATGCGTAAAGGAGAAAAATAGATATGTAGTTAGCAAGAAGA  
AAGACCGGTCTTTGACTTCTCCAATGTACAAAAGACAAGTGGCCATGGAGCAAGCAA  
ACAACAGTAGCTTTGTCCCATTTGTTCCCTTCCCTCCAGGCTACTTTGCGAAAAGGGA  
CACACAACAGGAAGATATCACAGGTTTCATCCTCTCTGTCTAGGGTTGGAAGTTTCATCT  
ACATTGAGCAACTCAGATCACAAGGGATCACCCATGAATCCTCTTTCCAAAACCTATA  
GTGAGAAGGAAGATGCAGAGAAGACACATCATGAGTCGGATGATGCTGGGTTTTTGT  
TCAGAGATACTATTACTGCACAGACTCCTGTTGATCAATTCACGAATTCAAGGTTTGC

AAGTCCAAGTTTCTCTG GGGATCAGGGGGTCCCTTGTGTTGGAAATTCAGTTGAAACC  
TCTCTTGCTTTAGATGCTTGCAGAACTAATAGTAAAGACAGAAGAACTCCGTGAAC  
GAGGATGTATCCTTAGCCGAGACTTTGGGAGTAGGTTCAACCAAGCTGCCTAGAAAC  
CAGAACGTCAGAAATGGATGGACAGGAAAGAGTTTGGAGGGGTCTGCTGTGAAGGA  
AACAGATCTGTTAGACATGTCTGAAGAAGCCAAAGCTGAGAGGTGGTTCCAGCGTGT  
TGCTCAGATAAAAAGACATATCTGAATTGAGTCAGATCCCAGATGAAGACTTCCCATCT  
ATTATGCCAATGCGCAAGGGAGTTAACAGATTTGTGGTGAGTAAGCGGAAAACTCCT  
CTTGAGAGAAGGTTGACATCTACTCAGTACCGGAGAAATCTTCCCGTTGTGACTTCTG  
ATCCTATGAAAAGAGAAAGGGACAACAATGATAAATGA

>SIRBZ4

ATGGTTCTTTCTCTTCTCCTTAGACGCTTATCTTCCTGTAGAACAAAACCTTATCT  
TTTCACCCTTTCGCAAACGAAAACCTTCTCTCTTTTTTCACCTTCAGATAAGCCTTCTT  
CTTTATCAGCTCGCATGAGCTTCGTATTCGACCAAATCGATGCTATTGAGAAAGAGCG  
GTCAGAGAAGGACCAAACCCTTCAACGAATTCGGGCCTGGCGTGAATCCAAAAAGGG  
GAATCAAACCCAAAACCAAGCCCAGAACCAAGACCCGGTTGGGTCAAGTTCGGGTTT  
TTCTGATGTGGGGTCATCGGAAATGGAGTTGGAATCAAGAAAGAATGATGGGTTTGA  
AGGTAGTGGTGGATTGATGAGTAAGAAGGTGGAATTGATGCATCCGTGGCCTGAGTG  
GATCGAGTTAATGGAGCGTTTGGTTCAGCAGAATTACTTTGATCATAAGAGAAAAGA  
TGAGGATAAAATGATTGAGAATTTGGGGTTCAGTTTAACTGGTGTGCTGAAGATGA  
GGGTTTTGATTTTACCAGGGATTGGAAGACTGCTCAGACTGCTGTTCTCAATTTTGGC  
AAAGATCGTTTTGATATGTTAAGGTCATTGTGCGAGACAGGATCTCCAAATTTTGGTTG  
GTTATGGATGCCCTAGTACAGACAAGAAGGTGGTTTTTTCTTCCAAGTTATTGAGGAA  
ACACGTTTCATCTGGACGAAGGGGATGTTTGCAGTTCTTGCAATTTGAGGAGTTCTTGT  
GAAAGGGCATATTTACTTACCAATAAGGAGGATGAAGCAAGGACAATGGATGTCATG  
CGTGTCTTATTGACTTTTGGTTTTAATGCAATCAATGGATCAGTTGATAATGAGAGTC  
TTATGAAGAAGAAATCTGTAAAGACTGTTGTTTCGCAAATTGCTTCACGAAATAGTGA  
AGTTGAGTGCTGTTCCAATAGATCCAAATCTTCCACCTCCAGTTTTTAAAAAACACC  
TCCAAAGGTGAAGCAGCCACCTCCCCCTCCGAGGAAACGAGTCGGACGTGATGACAT  
TGAGATGAAAAAAGGAGATTGGCTGTGTCCAAAGTGTGACTTCATGAATTTTGC GAA  
GAATACCATATGCTTACAATGTGATGCCAACCGGCCGAAGAGACAGCTGCTTCCAGG  
AGAGTGGGAATGTTCCAGTGTAATTTCTTGAATTATAGGAGAAATGTGGTATGTTTT  
CATTGTGAATGCAAGCGCCAGTTGATGACTATATGGTTGCTCAACAGCAGGAGAGG  
CTACAAGGATCCAGGACACAGATGAATAAAATATCTCGCCGGCAAGATGTTTCTAAT  
GCATGGAATTTTGATTTTGATGATGATGAGTCAGATGGTGCAGACATTGCTGCCTTCG  
AGACTGCAGATTCTCGGAAACTGGGTGAAGATTTTCCCCTGGATAGGCAAGAACGAA  
GAGATACTTCCAGGAGCAATGAAGATGGTTTCCACAAGAGCAGCAGGCCTCCAAAAG  
GTTACGAAACTGAATACCCCGCACCTGGGAAACCAGGGGTAGGCTTTAATGACTTTG  
ATGATGAAGAAGATGATGTCGACAGCTATGAGATAGACAGTAATGGAGCAAACAGA  
AGTTCTAAAATAGATTTCTCGGATATTGAGGTCAACTCCGAATCTGAAGATATTGATA  
GTGTTGATGACACTTTGCTTGTTGGTAGAAGGAACAGTTCCCCCGCAAGCGATGCACA  
TTTGTAGACAGAGACATCAGAAAGGGGCGTTTCGTGGTTCTGAGGATGCTGAAGTGGA  
TTTTGACACAGATGATGAGCTTCCAATTAATACTAATATGAGATCTAGTCAGGTTTCT  
TATTCTAAACCAAGATCTAGGAACAAAGGTGCCAAGAGTTTTGACTCTGATGACGAT  
TATGGCCTCAGCTCCGACTCCGATGATAGGGATTTCAGAAGTCAGCAGAATAAAGGG

AATAAATGGGGATCAAGAAAGGAATTTGGACGGAGAAGCAGCTCCTATAGTGAAGA  
TGAGCCCTTCTCTGACTCAGAGAGCAACAAAGGTAGGTCATTTACAAAAATAAGCA  
AAGAGGCGGTAAAGCTGGTCAAAATGGCAGATGGGACTCATCCGAAGTTGGTGGTGA  
TGGGATAAGAGACAAACGATCCTCTTTTCGAGATAACATGAAAAGAAGTCCCAGAGA  
CTTACGTGGAAGCAGCAGGAGAAGCCAAGATAATGGATATAATGATTATAGAAGCCG  
TGGACGTGAAGAATCTTATAAACAGCAACGAGGAAGAAATAGTAATTATGGTGATCA  
ATCAGATAGTTACTTAGACGATGAAAGACATAGGAGGCCAAGAATAAATGTCCGATG  
A

>SIRBZ5

ATGGTTTCAATTTCAAAAATCCTTTTCACTTTACTACCCAAAATCAAACCTCAACCTAA  
ACCCTACCATGTCCTGGTCATGTTCAAGCTGCACATTCTTGAACCCTCCTTCCCAAAA  
ATCATCCTGTCAAATCTGCTTATCTGATTACCATCATCAATCTCATCAGACCCTTCAA  
TTTCAGTCCAAAAACCCAAATGGCCATGTAAAGCTTGTACCTTTATGAACCCTTATCA  
TAGTATAAGTTGTGAAATATGTGGCAATAGGGTTTCAGCTTCAGGACTTGCTACACTT  
GAAACTGAGGATGATGATGATGATTTGAGTTCTTCTGTTGGTAATGTGTTCTTGCCTTT  
GAGGCCTTGTAACAAGGGGAAAGTAATAACTAGGGCTCCTATTATGGTTCAAGATGA  
TGTGAAGGATTCTGTTAGGGCTAGATGTGCGAATGCGGCAAACAAGAGGAAAAACA  
GGGAGGAACCATCTGGGGTTGAAGATGATGAGGTTGATGCTGCTATGGGGTATAGGG  
GTATAAAGGCTGCTGCTACTAAAGCAATTGAACAATCGAATTCGGTGGAACAGGAAC  
CAGGCAAACTTTCTCAACCAGTAAATCCAAAGTGTTGAAGATCTTGACCTACAATGT  
GTGGTTTGCAGATATAGAGATGAACAAGAGGATGAAAGCCATAGGCAACCTTATTTTC  
GCTGCATAAGCCAGATGTTATATGTTTTTCAGGAGGTTACTCCAGAAATATATGACATC  
TTTCAGCACTCTGGTTGGTGGAATAATGTATTCTTGTTCATTTCAAATGTGATGGAATT  
GACGATAGGGTACTTCTGCATGCAATTGAGCAAACCTTGCAAGTAAATCCTACAGTTG  
CAAGCCATTTAGCAATTCTATAATGGGAAGGGAACCTCTGTATTGCTGAGATTGAAGTT  
GAGAAAGATACGACCTTGGTTGTTGCCACCAGCCATCTTGAGAGTCCTTGCCCTGGGC  
CACCCAAGTGGGATCAAATGTACAGCAAGGAACGTGTGCAGCAAGCCAAGGAAGCT  
GTGGAGCTGCTTGACAGAAAACGAAATGTAGTCTTTTGTGGTGATATGAACTGGGAT  
GACAAATTGGATGGTCAATTTCTCCAACCTGATGGATGGATTGATGCTTGGGGAAAA  
ATGAAGCCCGAAGAAATTGGATGGACATACGACACCAAGTCAAACAAAATGTTAAG  
CGCCAACAGGACACTACAGAAACGTCTAGACAGGATTGCCTGCAAACTGCAAGATTT  
CTGTATAACTGATGTTAAGATGATTGGAAAGGATGCAATTCCAAATCTCACATACATC  
AAAGAGAAGAAAGTGAAGAGTGAAGTTAAGAACTGACACTACCTGTTTTGCCTAGT  
GATCATTATGGTCTACTTTTGGAGATCTCTCCTCAGTAG

>SIRBZ6

ATGGGACGAGAAGGAGATTGGGAGTGTAGTAGCTGCGGTAATAAGAATTATGCCTTC  
AGATGTTTCTGCAATAGGTGTAAGCAGCCTCGTCTCCTTGTTGACAACAAAACCTCCTC  
ATGATTCAAAGTGGTTTCTCGAATTGGCGATTGGATCTGCACTGGTTGCACTAACAA  
CAATTATGCATCAAGAGAGAAGTGCAAAAAATGTGGACAACCAAAGGAGGTAGCAG  
CAATGCCAGCAATTGCAATCCCTGGAGCATCTCTCCCATCTCATCCAAATTATTTTGC  
CAGGACACAAGGAGGTATGGAACAAAGGTTGAAAATTGGGTTCTTAGGACATGGAG  
CTCTCCAACAACCTCCCTTGAGCTCTAACTGGTCTCTAGGGGAGGCTGGTCAATACCA  
AAGCCAGCCTGCTGATCGGTATAGACTGCTGCAAACTCCTGGAGTTCCATATGCAAG  
CCAAACGAATCAGCTGCTTCCAGTTCCAAATGGATGGCGTAATGGTGACTGGCTCTGC

AGTTGTGGCTTTCACAACTACTCTTCTCGAGCTCAGTGCAAAAAATGCAATGCTTCTG  
CACCTCCAGCTTCATCGTCTTCTCTTGCCACTACCCCTATTACAGCTCTTGGAACAAAG  
CGATTAGCATCTGAGGAACTTGTTTCATGATTGGGACAACAAGAGGCTGAATGCAGGA  
CATACATTTGGGTATCAACAAGGCTATCCAGGAGCAGAATGGATGGGGGATTTCAGGG  
GGAAATCAACTAACTGCAATCCCAACGATCTTCCTTAATGAAAATTCAATGGTGCTTC  
CTTTGCAAGCCAACATGCAGATTCCTCGTGTACCAGCAGCACCTACACTCCTTGGTAA  
AGGGGCAAAGCAATGGCGTGATGGGGACTGGATGTGCACTAATTGCAGTAATCATAA  
TTACGCTTCTCGATCAAATTGTAATAGGTGCAAAAGTGAGAGAGACGTACCAACTCA  
ACCTGTTACTGTTGCATAG

>SIRBZ7

ATGTCAGCTTCTAGATTGTTCTTTCTACTTGGAGCTTCGACTGTTTCGTAACGTAAACAA  
GCCTACGAATATATCTTCTCCATTTTCTCCATTTTCGATTCTCAAAGCCGTTGCTTTGTC  
CTGTTGTACGGTTCGCGAGTTACAATTGTACCTCAGCTACACTCGAGACCAAAAACAAT  
CGAACCATTGGTCAGTCCTAGAAATCATCCATGGCCAGAATGGGTTGCTTTTCGTGGAC  
CGTTTGAAAAGCAAAGGATACATTACAGAAAAAAGTACGAGCACGGGTGAAGACGG  
CGATGGGAGTATTTATACGGATATGAATTTGTTGAAAGATGCATGCCTTAACTTCTCT  
CGCGACCGTTTCAGACATTTTCAAAAAGTTGTCCACCCAAGATATGCAGAAAGTTGTG  
GAGAAGGGCTGTCCTAATCTATTTCAGGAAGGTTGTTAACTCTGCGAAAAGGCTAAGG  
ATTCATCTAAACCTCGACGAAGGAGAGGTATGTGGTGCTTGCAATTTCCGTGGATCAT  
GTGATAGGGCTTACTTGATATTAAAGGAGTCTGAGGGTGTGCGCGGTACAGTCGATAT  
TGTGCGGGTCTTGCTTATTTATGCATTTGATTCTGCAGTTATATCTAGTGAGCAATGC  
CTCCTGGTAGTGAGCTTATCGAGGTATCTGCAAGACAATTGCTCTCAGAGTTGGTTGA  
ATTAAGTGAGACACCTATTGATCCTGATCATCTAACACCTGCCCCCAAGGCTTCTCCA  
AGAAAGAAAGAGTCTGTTGGCTCAAGGACAGATGGTCTGGAAGATGTTGAAATGAAA  
AGAAGAAATTCAACTGGTCTTGAGGGTGAAATGCCTAAAAGAAATGTTGAAATGAAG  
CAAGGAGATTGGATCTGTTTCGCAGTGCACTTTCATGAACCTTCGCCCCGAATGCACAGT  
GCCTGAGATGCAAATCAAAGGACCTAGTCGAGATGCTCCTGTGGTTAAAGAAATGA  
AAAAGGGAGATTGGAATTGCCCACAATGTACATTCATGAATTTTGCTAGCAATACCA  
AGTGTTTACGCTGCCAAGAGCAGCGTCCCAAGAGACAGCTGAATCCTGGAGAATGGG  
AGTGCCCTCATGTGACTTCTTGAACCTTCAGAAGCAACATGGTCTGCAAGAAGTGCAC  
TTGTGAACGTCCCAAAGATGCAAAGACACAGTCAAAATATGAGGAGCAACTCTGGAC  
AAAGCCTTACTAA

>SIRBZ8

ATGATCTTAGTGCAAAAATGTGTTACTAATTCTGAAGGCAATGAGATCTCAGAATCAT  
CTAAAATGAGCAATTTAACTGGTGGAAGACTGAAACCAATCTTCCAAATCAATCGG  
GAGTTGCTCTATGTCAAGATTTAAATGGAAGATTAGACGGGGTTGGCTCCGCGGTTGT  
TTGTGATTATACTTGTCAATGATGGACAATCTGGGGAGGTGTCACAACCTGGTACT  
AGAGACTCAGATGGGATCTCTGGTTTGAATGCTGATCCAGCTGCTATAACTAAAAGT  
GCTAAGCACGAAAGTGATATGACCTTGGAGGATATGTATAATGCTCGGTATAATTTTG  
ACGAGGATGATGATGACAGTGACTGGGAACCATCAGAAAAGCAAATAGAAGTTCTG  
AAGTGGTTCTGTGTCAATTGTTCAATGATCAATGTGCGAGGATGTTGGCAATTGTGAAG  
TATGCGGAGAACACAGAGAATCTGGGATACTCAGGCATGGATTTTTTGCATCTCCATA  
TCTGCCTGTAGAAGATATCAACCAAGATGAATTGCCTGTAACCTGAAGATTCTGAAGA  
TTCATGCAAGCAAAGTTCTTTATCATCCTCCACTGCTGTAGGGTTTGACGAGAGGATG

TTGCTTCACACAGAAGTCGTATTGAAGTCTCATCCACATCCTGAGAGACCAGACCGTC  
TTCGAACCATTGCAGCTAGCCTTGCAACAGCAGGTATATTCCCAGGGAAGTGCCATCC  
CATTCTGCAAGAGAGATTACTAGGGAAGAACTCCAGATGATACACTCAGAGGAAAA  
TATTGAAGCCGTTGATAACACCAAGCGTATGCATGCCAGTTATTTACACCTGATACC  
TATGCAAATGAATATTCAGCATGTGCTGCCAGGCTTGCAGCAGGTTTATGTGCTGACC  
TTGCTTCAGCAATTTACTCTGGATGCGTCAAAAATGGTTTTGCTCTGGTTCGTCCTCCT  
GGCCACCATGCTGGTGTGAAACAGGCCATGGGCTTCTGTCTCCACAACAATGCAGCA  
ATTGCTGCATCAGCAGCTCAGGCGGCTGGTGCAAAGAAGGTGTTAATAGTTGATTGG  
GATGTGCATCATGGGAATGGCACACAAGAAATATTTGAGAGAAGCAAATCGGTTTTG  
TATATATCATTGCATAGACATGAGGGTGGAAGATTCTACCCTGGTACAGGAGCTGCA  
GATGAGGTTGGTTCTATGGGTGCAGAAGGATACTGTGTGAATATTCCTTGGAGCCGTG  
GGGGAGTGAGTGACAATGACTACATTTTTGCATTTGAGCAAGTCGTGCTTCCCATAGC  
TTTGATTTCATCCAGACTTTACTATCATTTTCAGCAGGATTTGATGCTGCTAGGGGT  
GACCCCTTGGCTGCTGTGACGTAACCTGCTGGTTATGCATCAATGACTCAGATGT  
TGAGTGCATTGTCAGGTGGAAAATTGCTTGTTATTTGGAAGGCGGCTACAATCTTCG  
CTCAATTTTCATCATCAGCTACAGCAGTGATTAAGGTCTTGCTTGGTGAAAGTCCAGTG  
ATTGACATAGACAAAGCTGTACCTTCCAAAGCTGGACTGCGAAGTGTTTTGGATGTTT  
TAAAGATTTCAGATGAACTTCTGGCCTACACTGGAGGCAAACCTTCACTAAATTGCATTC  
GCAGTGGGGATCCTATGCTTTTCAGGACACAAGAGAACAGAGTAAAAAAGACGCA  
GGACTGGTTTACCAATATGGTGGAGATTGGGACGAAAGAGGCTGTTGTATCGCGTAC  
TGCCAAGCAGCTGCGTGCAAAGTCCTCTTGTAATTTTTCTTGTTGA

>SIRBZ9

ATGTCTCAGGTTGATAACAGAAATTCTTCTGCTGCCAAACGTGCCCCGAAGTATGGTG  
GCCGTAGGGAAGATGACTGGACTTGCCCTAGCTGTGGGAATGTCAACTTCTCCTTCAG  
AACTACGTGCAATATGCGCAACTGTACTCAGTCCAGGCCTGCAGATCACAACCTCAAA  
ATCTGCAGTTAGGCCCATGCATGCTCCACAGAGCTATTCACCCTCAGCTGCATATGTT  
GGGTCTGGTGCTCCCTCTTCAATGTATATGGGTGTAGCACCATATGGTGGTTCTTTGTT  
CAATGGACCATCCATGCCAGCCTATGACGTTCCCTTTGCTGGAGGTTCTGCTTATCAT  
TACAATTTTGGGAGCCGCCTTTCTGGGGGGAGCCCGTACCGCCCGGTACATCTCTCCG  
CTCCACCTCCTTACACTGGTGGGATGGGAAATGGTGGGATGTATGGTGTGCCACCACT  
TATGGACCGATATGGTGTAGCATTGCCAATGGCCCCTGCTGCCATGGCACCGAGGCC  
AGGATTTTATCCTGATGATAATTCTCAAAAGAAAGATGGAACACGTGATAATGACTG  
GGCATGTCCCAAGTGTGGCAATGTCAACTTTTCGTTTAGAACAGTTTGTAAACATGAGG  
AAGTGCAACACTCCAAAGCCTGGTTCTCAGGTTCCCAAACCGGTGAAGAACACTAAA  
CCAGATACGCCAGATGGAAGCTGGAAATGTGAGAAGTGCAACAACATAAACTATCCT  
TTTCGGACCAAGTGTAACAGACAGAATTGTGGTGCGGAGAAACCATCTGAAGCCAAG  
AAGTCTCCTTCACAATCAGCTGATGAGAATGATCAGTGA

>SIRBZ10

ATGGAGTTCAGTTTCACGTGGGATGCTACCTCTTTTAGGCTGCATACAGTGACCGAAT  
ATTACAGGCTGGATAGAAAAGCCCCTGTTACAGCAGCACTTGTTGCTGCTAATACAAT  
TATATACGTAAGGCCCACTTTTCTTCAATTCTATACTTCCTACCATTAATCAGGTATGGT  
TTAATCCCAGCTCATTCTTAAGGTGTGATACATTACTTTTTTCTGTCTGCTAGCTGAT  
CATAAGGCCAACAGCTTTCCTGAGCTGCATGTTTTAGTTTTTGAAGGTCATGTGTCA  
TATTATTCTGTTATTATTTGATGAATACATATTTTGATTTTCGCTTGTGCAGCACAAAGGA

CCTGAAACGATTCTTCCTGTCAGCACTCTACCATTTGAATGGTTCTCACTTATTCTACA  
ATATGCTCACTTCTGTGGAAGGGGATTCAATTGGAGACATCAATCGGAAGTGCAGAA  
TTTGCATCGACAGTTGCAGGCCTTAGTTGCTATGTCCCAGGGCATCACACTATTGCCT  
GAGAAGTCACTTCTGCTGTTCTTTAACTATGAGAGGCCCTACTATCAGGAATATGCTG  
TGGGATTTTCTGGTGTTCCTTTTGCCATGAAAATTATTCTCAATGCACAATCACATGAT  
TATACATATGTTTCATGGGCTGTTGGTACCGACTCGTTATGCTGCCTGGGCAGAACTGA  
TTCTCATACAAATGTTTCGTACCTGGTGTCTCATTTCCTTGGCCACCTTGGTGCAATACTT  
GCCGGCCTTCTGTTTTTGTGTTTAAAAGCATCGTATTCAGGTGCGAATCCACTGAGGA  
CAATCATCAGAGGTTTTGGGCATGCACTGAACTGGCCTTTAATGTTTATGAACTGTTT  
ATTCCGAAGGCAAATAATTGGTGGTAGAGGAACCGTTGGTGGGAGACAGACAAGAG  
ATACATCTCAAATGTGGCGATGCCAAGGATGTACATTTGATAATTCAGGCTGGTAAA  
TGTTTGTGATATGTGCAGCACAAAGTCGTA CTGATGATGTGCTGTCGTCTCTTAGTTCA  
ACGGATGAGGTTCAAGATCTATCATTGGATGAGTTGCGGCATCGGAGAATTCAAAGA  
TATGGTAGATGA

>SIRBZ11

ATGGGTTTCGCGTGAGAAGGACCAGCCAACACCGCACCTGAGCAGCCTCGTTGTACGG  
CCTACTGACAGCGGCGGAGAAAATGGAGGTGGCGGTGCAGGTAGCGATTACGAGCC  
AGGTGAGGTTTCGTCGGGATGCACCGCCGTATTCACGTTCCGATCGATTCTCTGATACC  
CATGGATATAGAGCGCATGCAGGTTCTGTTTCACCTGTGCGCCATAGGAATGCAGATC  
ATCGGTATAGTACTGATTTTGATCATTACAGGTGGCCCCGCCACGTAGTCATGGATTTGG  
TAGCGGTAGAGATCCTGGTAGACATCGAGACTATTCCCCCCTTATGGTCGCGGGAG  
ACATGCTGGCAGGTTTGTGGCAGAAGTTATGATGGACCTGGTTATGGTGGACGGCA  
AGTTAGAGGAGAAGGTCTGCCTAGAAGCAATCCAAATGTACGGCCAAGAGATGGTG  
ATTGGATGTGCACGGATCCCTTGTGTAACAACCTTGAACCTTGCAAGACGAGAGAACT  
GTAACAAGTGCAAAGGCCCTCGATATGCACCTCCAGGAAGTCCTCGGAGGGGTTATC  
CCAGCCCACCTCCCCATCATCGCAATCCTGGCCCCCAATCAACCGTTCTCCAGGAAG  
GTTTGTGAATGGGTATAGGTCCCCTCCTCGCGGCTGGGCTAGAGATGACCCCCGAGAT  
TTCAGAGCTGGTGTTCTTCATTCAAGATTTGAAGGGAGGTTTGCAGATCCTCCAATCC  
GTAGAGATAGGCCTGCTTTTGCTGATGCTGATGGTAGGGATCGAAGTAGGTTTGAGC  
GGCCTCCAGCCCTGGATTGGGGACATAGAGAGCGCGGGAGAGACAGCTATTTGAGTG  
AGAGAAAAGGTTATGAAAGGCGAACACCATCTCCACCTCATCCACCAGTACTACCAC  
CTCGTGGCCAATGGCCACGTGATACCAGGGAAAGAAGCCGTTCTCCAGTGAGAGGTG  
GACCACCGCCCAAAGACTATCGCCGTGATGTATACATGGGAAGGGGGCGAGATGATC  
GGAGGGTTGGACGAGGTGCATATTAG

>SIRBZ12

ATGGAGAGAGGAAGAGGACAGTGGGGATCAGTATTTTCGTGGTATGATTCCTCTGCTA  
GGGCTGCATACGCTGAGTGAGTATTCCAGATTAGACAGAAAACCCCCTATTACTGCT  
GCACTTCTTGCCGCTAATACCATTATTTACTTGAGGCCCAAATTTATTCATCCTTTTCCT  
TCCCACAATCGATCAAGTTTGGTTTAATCCTCACCTTATTCTCAAGTACACAGACCTC  
AAGCGATTCTTCCTGTGCGCGTTCTTCCACGTAAATGAATCTCACCTGGTGTACAATA  
TGCTTTCACTTTTGTGGAAGGGTATTCAACTGGAGACATCGATGGGTAGTGCAGAGTT  
TGCATCAATGGTTGCAACCTTAGTTGCTATGTCCCAAGGTGTTACACTGTTGCTTGCA  
AAATCACTTCTGCTGTTCTTTGATTACGAGAGACCCTACTATAATGAATACTCTGTGG  
GTTTTCTGGTGTCTCTTCGCCATGAAAGTTATCGTCAATTCACAATCAGATGAGTAT

ACCTCTGTACATGGACTTATGGTTCCTACTCGTTATGCTGCCTGGGCAGAGCTTGTCT  
CGTACAAATGTTTGTCCCTGGTGTCTCATTCCCTGGCCACCTTGGGGGAATACTAGCT  
GGCCTTCTGTATTTGCAATTAAGCGTCATATTCAGGTCTGAATCCAGTTAGACAAT  
TCATGAGAGGTTTTAGCCATGCTCTGAGCTGGCCTTTAAGATTAGTGAAGAGCTTATT  
TCGACATCGACCTAGAATTACTGGGAGAGGAACTGCTGGTGCGAGGATTGCACGAGA  
TACACTTCATACGTGGAGATGTGATGCATGTACATTTGATAATTCAGGTAGGCTGAAC  
GTTTGTGAAATGTGTGGCACAGGTCGTACCGGTGATGCACCATCATCCCCTGGTTCAA  
CAAGTGAGATACATGATCTATCTTTGGAAGAATTAAGACGTAGGAGGATTCAACGAT  
TTGGTAGATAA

>SIRBZ13

ATGTTGAAGATGATATTCGCATCATCAAACAAAATTATTCAAAACTCTTCCATTTCGA  
TTTCCATATCCATATCCAATTTCCATACCAAAAACTCAGCAATCCAGTTCGTTCTTGA  
AGAAGGTAAAACGCTTCAATCTCAACAAACCACTAAGCAGAACGAAGAAGTTGAGTT  
TAGCAGAAAACCTAATTCTGGAATTCAGACTCCTCAACTTTGGCCTGAATGGGTGAAC  
TTGATGGACAAGTTGTTAAAAATGGGATGTTTTGATGGATTTCGGAACCCCTTTTGAA  
ATGCTCAATGGGATGCAAACCTAATTAGAACTGCTTGTTTGAATTTTGCTCGACACCG  
ATTTGATCTCATAAGATATTTGTCCCCGCAAGATATTGAGGTGCTTGCAAGTTGTGGC  
TGTCCAAGCATGGATAGAAAAGTTGTCAACTCTGGAAAGCGTCTTAGACTATTGTTTCG  
GCATCGAGGAAGGAAATGTCTGCAGCTTCTGCATATTGAGGGGAAGTTGTGAGAGGG  
CTTATGCCGTACCACATAAAGATCAAGGTGGTCGAACTGTTGATGTTATGCGTCTACT  
ATTGACTTATGGACTCAATCCAATTACTGGTGCTGTGGAGAATAAACCATCCTTGAAC  
AAAAGAGTTGAAGAATCAGCAAGAAAGCTGTTGAAAGAAATTGTGAATTTAGTTCT  
GAGGAACTCTTTTGTGAAACAAAGAAATCCACAAACCCTTGGAATCCATCTGTACAA  
CGTGATCATGAAGAAGGTCAGATCAATGCTCTCAGGAAACATGGTGATTGGGTTTGT  
CCCGAATGCAACTTCTTAAATTTTCTAGAAATGCTAAGTGCTTACGGTGCAATGGCT  
TGAATCACGAAAGACTTAACAAGTTAAGACAGGAGCAGGATCATCTTCCATTAAAGA  
AAGGCGACTGGATTTGCTCCAAATGCCATTTTATGAACTTCGCAAAGAATACAAGGT  
GCTTGCAAGTGACAGAAAAGCCACCTAAACGGCACCTTAATCCTGGAGAGTGGGAGT  
GTGAATCGTGCAACTACATCAATTTCAAAAGAAACACAGTGTGCTTGAAATGTGATC  
ACAGACGACCAAAAGCATCTAGCTGTGCAGGTTCTTCCTGTGGATCTGCAAATCAAA  
GTAGAACCATTAGTCGAACACGGCCTTATTTTGGTGAAGTGAATGAAGAAACAGATG  
AGGAATGGCAATTGATTGAGAGTGAGCGTGAAGATCGTTTGAGCTCAATGCCAGAGA  
ATGAGGTTGTTGATTTTCTGTTTTAGGGGGGAATAGTGAATTGTCTCGAGATGCAAA  
GAAGCAAGAAAGGTGGAAGACTGGAAATAAAAGAGAAAATGGTGATGAATTGAATA  
AGAAGTATTTTCAAAATAGTGGCAATGAGGAAATGGATGAGTGGTTTGGGCATAAAA  
ATGTGTGA

>SIRBZ14

ATGAGCAGACCAGGAGACTGGAATTGTAGGTCATGCCAGCATTGTGAAGTTTCAAAGG  
AGAGATTCATGCCAAAGATGTGGTGAGCCAAGACATGGTGGAGCTCATGAATTCGGA  
AGTAATTGTTTTGGCGGAAGGGGAGGAGGAAGCTCCTCCCCTTTCGGATTAGTACC  
GGGCCTGATGTAAGGCCCGGTGACTGGTACTGCAATGTTGGAAATTGCGGTGCCCAT  
AACTTTGCAAGCCGCTCTAGCTGCTTCAAATGTGGTGCTTTTAAGGATGAATCCTCCG  
CTGGTGGTTGTGGTGGTAGCAGCTTTGACTCTGACCACATGATGTCATCGCGCCC  
GAGAGGATTCGGGTTTCGGTGGTGCCAGTGGTGGCAGTCGCTCTGGATGGAAGTCTGG

TGACTGGATTTGCACCAGGTTAGGGTGTAATGAACACAACCTTTGCTAGTAGGATGGA  
GTGTTTCAGATGCAATGCACCTAGGGACTTAGCTGGTAACAAGTCTTCATATTAA

>SIRBZ15

ATGGATCCTGGTCGATATGGCCCCCATCAAGGATGGGAAAATAACAGCGCTTTGGAG  
GGTTATAGAGGAGTTCACGAGCCAGATTTCCGGGCTGGTGGTTCTTTTGATGATAGGA  
GGTTTCTAGACGATAGATTTTCAAGGGATGGTGTATATCCCCGGGGTGCCTATCACCG  
TGATATACTGGATGGAGAGCACTACCCTCATCCACCAGCAGCAGTTGGACACTGGCC  
TCAGACAAGGAGGAGAAGTTATGAAGAAGTGTACCCTGTGGAGAGGGATTCCAGGA  
GGCATGAGAAGCCGCCTGCTAGGTACGTGGGACGGGAGCATGACGACCCATATGATG  
ATTATGACTACAAACATCGTATGGCTCACCCCAACAGAGAGGATAGCCGTGAAAGAG  
ACTATGAGTACAGTAGATATAGTTATGACTCAGACTATGAACGTGGCAGTAGGAGAG  
ATGATAACTGGAGACGACGTGAATCCCACGAGCGTGAACGTGACAAAGAATCAAGTC  
GTGAGAGGGATCCGAGTCCATATAGAAGGCATGAGCGTTCACGGTCACGTTCTCGTG  
GTCATGATGATCGGCTGAGGTCAAGATCTCCTCGAAGTCGAAGTCATAGTCGCAGCC  
ACAGAGAGGACAGTTATGATGACGGCCGATACGATAGAAGTGAGAGACGAAGAGAT  
CGTGATGATAAAAGATAACCATGACAATTATTCTGTGGCTCCTTCAGCGACTGTTGTTG  
TCAAAGGCCTTTCACAAAAAACTACTGAAGAAGATTTGTATCAAATCCTTGCTGAGTG  
GGGTCCCTTACGCCATGTTCTGTGATCAAAGAGCGAAATTCTGGCATTCTCGTGGA  
TTTGCTTTTATTGATTTCCCTTCGGTGGATGCGGCCCAAGCAATGATGGACAACTTG  
GGGATGAGGGTCTAGTTGTGGATGGTAGGAAGCTTTTTTTTGTAGTACAGTAGCAAGCC  
AACTGGAGGCCCCGGTGGGCCCCGGTGGTCTAGACAATGCTTCAAGATCTAACCATGG  
TCACCACCGAAGCATGACTGTTCCATCCGATTGGATGTGTACCATCTGTGGATGTGTG  
AATTTTGCACGGCGGACATCTTGCTTTCAGTGTAATGAGCCAAGAACAGATGATGCTC  
CTCCAGCAGACATGGCATCATCAACTCTAGCTCTCTAGGGAGGAGAGGTGAAGCAG  
GTCCACACATGTCTTGTTGTCCGTGGATTAGATGAAAATGCAGACGAGGAGATGC  
TTCGTTATGAATTTTCCAAACATGCTCCTATTAAGGATCTTCGTCTTGTCAGAGACAA  
GTTCACTCACGTGTCAAGGGGATTTGCTTTTGTGCACCTTCTATTTCGGTGGAGGAAGCT  
TCTAAAGCTCTTGAAGCAACAAATGGGACAACCTTTAGAGAAGAATGGGCAGCTTCTT  
AGAGTTGCGTATGCAAAAAGTATCCTAGGACCAGGATCTGGTACTTCTCAGGCTAGC  
AGTCTTGCTGCTGCTGCTATTGAAGCAGCAACTTTTTCTCAACAGTATGATGCTGTTG  
GATGGGCACCAAAAGAGTATAATCCTGATGATAAACTGTCCACTGGTGGACAAGAAC  
ACAGTGGAGAAGTTGCTGGTCAAAATTCTGCTCCACAATCAGGATTTGTCTGGGATG  
AAGCCTCTGGCTATTATTATGATGCGACTTCTGGTTTCTATTATGATGGAAATACAGG  
ATTGTATTATGACGGTAACAATGGAATCTGGTATACTTATGATCAGAAAACCTCAGCAA  
TATTTACCCTGCACGAATCAGAATGAAAACAAACCAGCAGCTGGACAAACTGAAACT  
GCCAAGTCATCTGATGGCTCAAATACTAAGAAAGTCATTATATCTGCACCAGCTTCCA  
CAATTGCTGGTGAGAAGGCTGCCTCACTGCCGGATGCTATTCAGGCTGCTGCCTCTGC  
AGCAATAGCTGCTGAAAAGAAAGAGAAGGAGAAGGCAAAAGAGATAAACTTGCAT  
CAAAAAGCAGCATCCTTGCAAATAAGAAGAAAATGAGTAATGTATTGTCAATGTGGA  
AGCAAAGAAGTCACGAAGGTCAAGCCCCCGTGTGGCTCTTGAAGACAGCCAAACAG  
TGGGTGAAGACAGATCTAACTCAGTAGGTCCAGTTGTAAAGACTAAGTTAAAAGCTG  
AGCCCTTGACAACTAGAGAGAATCCTACTGCCTGTTTCAGGACTTGTAGGAAGCTCAA  
ATTTTCAATCTGTGAGTTCCGAGACTCAGGATAGGCCTAGGTCTCTTACTAACAGCTC  
TGGGGGCACTCTGAAGGGCGTCATAAGAGGTTCTGGTTTAGGAGTGGTGAAATCGGG

TACTCTATATACAGGATCATCTGGAAGTGCATCCACGTCACACACCATGCCACCAACC  
TCAGGTCCAACCTTCATTAATAAATGCAGATGCCTCTGCAGCACCCTTTAGGACAGATG  
CATCGGCTTTGGGTTCTTATACACCCCCAGTACCAGCTGGTAGTAAAAGAAGGTTCTC  
AGAGATGCCATCACAGCCTCCTCCATCTATTAAGGAACAGTCTCAGTCTACAACTGCA  
TACCGAGATCGTGCTGCTGAGCGGAGGAGCTTATATGGTTCATCTTCAGCTTTTGGAG  
ATGATGCATCAGAGCATGGAGATTCAAATCGGGACTCAACATTCAGAAGAGGTGTTT  
TTGATCCAACCTCCTTTCCCCCCTGGTGTTGGAGGTGGACGTAGTGCAGAGGCGAATAG  
TCAGAGCTTTGAGGTTATCACGGCTGACAGGGCTATAGACGAGAGTAACGTGGGCAA  
TCGTATGCTTCGCAACATGGGATGGCAGGAGGGCTTGGGATTGGGGAAGGACGGAAG  
TGGTATGGTGGAGCCAGTCCAAGCTCAAAGCACTGGACATAGAGCCGGACTGGGAAG  
TCAGCAGTCCAAGAAGGTGGACCCAAACCTTGAAGCACAGTCAGGTGACAGTTACAA  
GACTCTCATTCAAAAAAAGGCTATTGCTAGGTTTCAGAGAGATGTCATAA

>SIRBZ16

ATGGCATCGGAGGATGAATTGATGATGCAGGATGCTACCGACGACGGCGAGTCCTTC  
GATGATGATTTCTACAGCGGCGGCGATGTTTCATGATGATTCCGATGATGATGACGTCA  
TGGATTACGATTTTCATCGATAACGACTCCGATGATTCTGATACGGTCATCGCACATCA  
TCGCTCTCAGTCAAACATATAGCATCTTGAATGAAGCTGATATTCACAAATGCCAAGAG  
GAAAGTATTACAAAGATATCTACAGTGCTCTCTATTCCAAGGGTAGCTGCTGGCATCC  
TGCTTCGCCATTATAACTGGAGTGTGAGCAAAGTGAATGATGAATGGTTTGCAGATGA  
AGGAAAGGTCCGCAGGATTGTTGGTTTGTAGAGAATCATGTGCCACTCCCTGATGG  
GGAAGAGCTTACTTGTGGGATCTGCTTTGACGTTTATCCTCGTAAGGAAATCAGTGCG  
GCTGCTTGTGGTCATCCTTTTTGTTTCACATGCTGGCAAGGGTATATTAGCACGTCCAT  
CACTGATGGTCCTGGATGCTTGATGTTGCGCTGTCCTGATCCATCTTGTAGTGCTGCTA  
TCGGTCTAGATATGATAAAACAAATTGGCCTCTGATGATGACAAAAAGAAGTATAATA  
GGTACTTTATCAGGTCGTTTCGTGGAGGACAACAGAAAGACAAAATGGTGTCCTGCTC  
CAGGGTGTGATTATGCAGTTGACTATATTGTTGGTAGTGGAAGCTATGATGTTACTTG  
TGGGTGCTCATATAGTTTCTGCTGGAATTGTACCGAGGAACTCATCGCCCAGTTGAT  
TGTGGAACGTGTGCTAAGTGGATTTTGAAGAACAGTGCAGAGTCTGAGAACATGAAC  
TGGATATTAGCTAATTCTAAGCCTTGTCCGAAATGCAAGCGGCCAATTGAGAAAAAT  
CAGGGGTGCATGCATATCACATGCACACCACCCTGTAAATTTGAGTTTTGCTGGCTCT  
GCCTTGGCCCTTGGACGGATCACGGTGAGAGAACTGGTGGCTTTTATGCGTGCAACC  
GTTACGAGTCCGCAAAGCAAGATGGAGTGTTTGATGAATCTGAAAAGAGGAGAGAG  
ATGGCCAAAAATTCTTTAGAAAGATATACATTACTATGAGCGATGGGCCACCAAC  
CAGTCGTCACGGCAAAGGCACCTTCAGATCTTCAGCAAATGCAAACAGTACATCTT  
GAGAACTGAGTGACAAACAGTGTCAACCCGAATCACAGCTCAAATTTATTATAGAG  
GCCTGGTTGCAGATAGTTGAGTGTAGGCGTGTGCTAAAATGGACTTATGCATATGGTT  
ATTACTTACCCGAGCATGAACATGCCAAAAGGCAGTTCTTTGAGTATTTACAAGGTGA  
GGCTGAGTCTGGACTTGAACGGCTTCATCAGTGCGCGGAGAAAGAACTCCAGGGGTA  
TCTTGATGCAGAAGGTCCATCAAGAGAATTTAATGAGTTCCGAACAAAGCTTGCAGG  
GCTTACAAGTGTAACTCGAAACTACTTTGAGAACCTGGTTTCGAGCTTTAGAGAATGGT  
CTCTCGGATGTGGATGGTCATGGTGCTTACAGCAGGGCAGCTAGCTCGAAAAGCTTG  
GGAGGTGGGAGCATCAAAGGGAAGGGCGGTAGAGGAAAGGGAGCCACATCAAGATC  
AAGCAGTTCCAGAAACATAGATGATTCAGGACACTGGTCTTGTGAGTATTGTACATAT  
GCCAATGTTAGGTCTGCTACCGCGTGCCAGATGTGCCAGCAGCGTCGTTGA

>SIRBZ17

ATGGCAAGCTATTCAGGGAAAGGATCTACATTAAATGGTTCTGTGTATGTCTGTAAC  
TGCCCTTGGTACAGATGAAGATATGCTAGCTGAATATTTTGGCACAATAGGGGTGCT  
AAAGAAAGACAAACGAAGCGGTAGGCCCAAGATATGGTTATACCGTGATAAAGTTA  
CTAATGAGCCCAAAGGCGATGCCACAGTCACATATGAAGACCCTCATGCTGCATTAG  
CTGCTGTTGAATGGTTCAATAACAAGGATTTTCATGGGTCAATGATTGGGGTATTTAT  
TGCAGAGTCTAAGAACAAGACGAGGCTTCCTATGTTTCAGTGAATCAAATTAGTGA  
GCCCAATCTGAACAGTGGTCTGGCTGTGCTGGATGAAGGCTCCAACGATATAGATGG  
AGGTGGCGGAAGAGGTAGGGGCAGGGGAGATGCTTCTGCAAAGGCATGGCAACAAG  
ATGGTGACTGGCTGTGTCCAAATACAAGTTGCACTAATGTGAACTTTGCATTTCTGG  
AGTTTGCAACCGCTGTGGAAGTCTCGGCCTGCTGGTGCTGGTGGCGGTGGGGCTGG  
AGCTGCTGGTCGCGGGAGAGGACGTGGTAGCCAGGACCCAGGCGCTCCTGGTCGTGC  
AGTTGGTGGTCCTCCAGGCCTCTTTGGTCCAAATGATTGGGCTTGTCGATGTGTGCC  
AACATTAAGTGGGCTAAGAGGAACAAGTGTAAACATATGCAACACCAACAAGCCTGGG  
CACAATGAGGGTGGTGTGAGAGGAGGACGTGCTGGAGGTTATAAAGAACTCGATGA  
AGAAGAAATAGAGGAAACTAGACGTGCGAGGAGAGAGGCTGAAGAAGATGATGGTG  
AAATGTATGACGAGTTTGAAATCTGAAGAAGAAGTTTCGTGCTAAAACACAGCGAG  
CAGAAGCAGCCAGAGCCTCCCCCTGGAGTAGGACGCGCTGGATGGGAAGCTGAG  
GAATTAGGGGTGGCGGAGCGAGATAGAAAGGAAAGAAGCAGAGAAAGATCAAGAG  
ATTATGATGATAGGGAGAGAGCTAGGCATCGAAGCAGAAGTCGGGAAAGGGATAGG  
GGAAGAGATAGAGACCGCTCCTACGACTATGATCGAGACAGAGAATATGGTCGTGAC  
CGCGACCGTGAGCGGAACAAGTATCGTCATTGA

>SIRBZ18

ATGTGTGCTGCATGCCAACACCTAAATTTCAAGAAACGGGATGCATGTCAACGATGCA  
GCTGCCCCAAAATATGCATCACCAGCTGATGTTGCCATGTATGGACTAAACAAAAGTAA  
GTCTTGGCTGGAGACTGGTATTGCAGTGGTATGAACTGTGGTTCTCATAACTACGCAAG  
CAGAACAAGCTGCTATCGATGTGGTGCCTTAAAAAGTGATTATTATGGCATCGGAGTAG  
GAATGATGGCACCGACAGGTTATGGATATGATTCAAGTGCTCTTCCTGGTTGGAAGAGT  
GGTGATTGGATTTGCAGCAGATTAGGATGTGGTATGCACAACTACGCCAGTAGAGCAG  
AATGTTATAAGTGCAAGACACCTAGGGATTTTCGGAGGTGATATGAGAGAAAGTGAATT  
GTATTGA

>SIRBZ19

ATGAGTAGGGAAGGAGATTGGATGTGTTCTGCATGCCAACACCTAAATTTCAAGAAAC  
GAGATGCATGTCAACGATGTAGCTGTCCTAAATACGCAACATCGGCTGATGTTGCTATG  
TATGGACTAAGCAAAACAGATGTTCTTGCTGGAGATTGGTATTGCAGTGCCATGAATTG  
TGGTTCTCACAACCTATGCAAGCAGAACAAGTTGTTATCGATGCGGTTTCATAAAAAGT  
GATTATTATGGTATGGGGGTAGGAATGATGGCACCAGCAGGTTATGGATATGATGCAAG  
TGCTATTCCTGGTTGGAAGAGTGGTGATTGGATTTGCAGCAGATTAGGATGTGGTATGC  
ACAACCTATGCCAGTAGAGCTGAATGTTATAAATGCAAGACACCTAGAGATTTTGGTGAG  
CCATCTGCCATATGA

>SIRBZ20

ATGAGCATGGAAGGAGATTGGATGTGTGCTGCATGCCAACACTTAAATTTCAAGAAA  
CGGGATGCCTGCCAACGATGTAGCTGTCCTAAATATGCAACAACAACCGATGTTTAC  
ATGTATGGACTAAACAAAACAGAAGTCCTAGCTGGAGACTGGTATTGCAGTGCCATG

AACTGCGGTACACACAACACTACGCAAGCAGAACAAGCTGTTATAGATGTGGTGCCTTA  
AAAAATAATTATTATGGCATCGGGACGGGAATGACAGCATCAACAGGTTATGGATAT  
GATGCAAGTGCTTGTCTGGTTGGAAGAGTGGTGATTGGATTTGCAGCAGATTAGGAT  
GTGGTATGCACAACATATGCCAGTAGAGCAGAATGTTATAAATGCAAGATGCCTAGGG  
ATTTTGATCAGTTTCTCAAGGAAGGGTTAATTTCTAAGTTTGTAAGTGTGCAAGTTCTA  
ATGAATGAAAATCCCTTCAGATTTTGCATTTCCTTATGTTTTCAAGTTTCAACAACCTGCT  
TCTGTCAGGGCAGTCCGATGAGTATTATTGGTTTGGGCTTGGGACTTCCATGTTGGAG  
GTCTCAAGTTCGAAACCCCTTGCCAGCGAAAGCAAAGGGTTTGCCTTCTGGGTCAAG  
CTCGTCGCACCGGACTTGCCTAGTTTGGGTACCTCTCCTATGTGGTTTACGAGCTATT  
GAATAGGAGCCCCCTTACCCTATTCGCACCTAAAGGGTAA

>SIRBZ21

ATGAATTTGGGCGATCTTAATAAGGTATGGGAAATCAAAGCTTTGAAGCGTAAACCG  
AAAAATGAAGAAGCGAACAAGATTCTGGAGAAAATTGCTAAACAGGTTACAGCCATT  
ATGCGTAAACATAACTGGAGAGTTAAACTTCTATCTGAATTTTGCCAAAAAGAGCA  
GCGCTTTTGGGATTGAATGTAGGAGCAGGGATACATGTAAAGCTGAGGCTTCGAAGA  
CCGAACAATGATGAGGAATTTATCCTTACAATGAAGTTTGGATACTATGCTTCATG  
AACTTTGCCATAATGCTCATGGTCCGCACAATGCCAGTTTTTACAACTATGGGATGA  
ACTTAGAAAGGAATGTGAAGATTTAATTGCTAAAGGGATAAGTGGCACAGGAGAAG  
GGTTTGATCTCCATGGAAGACAATTAGGAGGCCGTCACCCACAGCCATCCATGTCGTC  
TCTTCGGCAAACCTGCTGCAGCTGCTGCTGAAAATCGAGCACGTCTTAAATCCTTGCTA  
CCATCTGGGCCTAGACGCCTGGGTGGTGACCATTCTATTAAGTCTGCACTTACTCCAA  
TTCAAGCTGCAGCAATGGCTGCAGAAAGGAGATTACAGGATAATATTTGGTGTGGTT  
CTGAATTGTGTGAAGTATCAGACTTAGATGAACTTCTGATGCATTACCTGAGACTTT  
ACCACTAGGGCATACTTCTGATAGATCCAAGCTCTCTAATGGGTTTGATTCACTGTCT  
TCCAAGGTAACATCTCGAAAAAGAAGTCGAGAATCAAATTCTGTATCATCCTCAAAG  
TCCTTGATGGCCATACTGTGACTAAGCCAGTATCTAAGCCCCTGTCTAACCATGATA  
AGGAAATTGCTCACAGAGTTGGTCAGGTAGAAGGGAAATCTCATAATGTGGCATCAA  
GAGGTTATACAGAGTCTTTTATTGATTTAACTGGCAATTCTTCGAGTTCTACATCAATA  
CATGGCCATGATGACTTACACGGTCCCAATGAATCAATGATGTGGGAGTGTTTAATGT  
GCACACTGTTGAACCCACCATTAGCTCCTTTGTGCAAAGTATGCCAAACCCAAAAGCC  
CAAAGACGTGGATGACAGAAATAGTATATGGTCGTGCAAATTTTGTACCCTGGATAA  
CAGTCTGAAGTTGGATCAGTGCACAGCCTGTGGAGAGTGGAGATATTCTCACGGCCC  
TCTGTAGCAACATCAGCGCCCAATCTTGGCACTTGA

>SIRBZ22

ATGAATGTATGTGATGTATGTGGAAATCCGAAACAAGAACTAGTTAAGGCTGGGGTG  
TGGTGTTGTCCTATTTGCACATTTGATAATGAAGATACCACAAATTTATGTGATATGT  
GTGGCGTCCTGCGTAATCCATTGATCAAAGGCGGGCGGTGGCAAAGCTAGCGCAGCAA  
CTAGCGACAAAGTCGAACAGTCAAATGTTAGTAAAAAGGAAATAGCTGGCGAAGTTA  
AAAAAGAATTGGTTTCTGAAGAGCCTACTAGCTCTTCTGCATCAACAGCGAAGGTTA  
GACGTGATAATATGAAGGATAGAGGTTCTTCTATAAAATCTAGAGGATATCATGGCG  
TCATGAGCAATGTGGGCAATATGTCTGTATCATCAAATCCTCGCAATGCGGAGAGTA  
GAATTGCACCTTCAAGATCACAGACTAAACCTCAGAAAATTGTATGCACTGATCAATT  
AGAAGACAACTGAACCAGCTAAATCTTGCAATCGTTGGCCATGTTGATTCTGGGAA  
GTCAACACTGTCAGGAAGACTACTACACCTTTTGGGGCAGATATCTCAGAAGGAAAT

GCACAAATATGAAAAAGAGGCCAAGCAGCAAGGAAAAGGGTCCTTTGCTTATGCTTG  
GGCTTTGGATGAGAGTGCTGAGGAAAGAGAGAGAGGAATAACTATGACAGTGGCTGT  
TGCCTACTTTAACACAAAAAGTTACCGCGTTGTACTGCTTGATTCCCCAGGCCATAGA  
GACTTTGTCCCAAATATGATATCAGGTGCAACACAAGCGGATGCTGCCATTCTTGTA  
TTGATGCTTCAATAGGTGCATTTGAAGCTGGCATTGATGTTAGTGGAGGTCAGACAAG  
GGAGCATGCACAACTTATCAAAAAGCTTTGGGGTGGATCAGATAATAATTGCTATTAA  
CAAAATGGATGTAGTGGGATACTCCAAAGAACGGTTTGATAACAATTAAGAATCAACT  
AGGAACATTTCTCCGGGCTTGTAAGTTTAAAGATTCATTAGTATTGTGGATTCCCCTG  
AGCGCCATGGAAAACCAAAATTTGGTGACAAGTCCTTCTGATGCAAGATTGTTGTCCT  
GGTTTCAAGGTCCATGCCTTTTAGACGCCATAGACTCTCTCCAACCTCCCCAGAGAGA  
TTACTCGAAGCCTATATTAATGCCGATATGTGATCTCGTTAAATTACCCTCACAAGGA  
CAGGTGTCAGTATGTGGGAAGTTGGAGACAGGAGCTCTTCAAACCTGGAGATAAGGTT  
CTAGTTATTCCATCAAGAGAAATGGCAACTGTGCGTTCTTTGGAACATAATTCTCAGG  
TTTGTAACAGTGCAAAAGCTGGAGATAATGTCACTGTTAATCTACAAGGTATAGATGT  
GAATCGTGTAATGGCAGGGGATGTGCTGTGCCACCCTGAATATCCTATTGCTGTTACA  
AATCATTTGGAAGTGAAGATTCTTCTCCTGGATATTGCTGTTCCAATTTTAATTGGGTC  
TCAGTTGGAATTTTCATGTACACCATGTAAAGGAGGCTGCAAGAGTTGTGAGGATTTTG  
TCCTTGCTTGATCCAAAGACTGGAAAGGAGACCAAGAAATCACCTAGATGTCTTCTA  
GCAAAGCAGAATGCTATAATTGAGGTAGTTTTGCAAGGGATAATTTGTGTTGAAGAG  
CATTCTAAATGTAAGGGTCTTGGAAGGGTGTCCCTCAGAGCATCAGGAAGAACCATC  
GCTCTTGGTCTTGACTAGAGTTCTAGAGAAGAAGGAATAG

>SIRBZ1

MDSDFEYDMYSADEEEDSNNVDESNIIVYEQKNYKILKDFDIRQLVKEDISKISAILSVP  
RDVSLALLRRYNWK  
VDRANEWFANEQEVRKSIGMFLCDNDNNNYVPVSKSKKNDNIVNCGICFEEYNDVVYAT  
CRKHPFCKLCW  
EKYIGASINYSGPNKCLALRCPDPSCEAMVGESIIVELASEIDKSKYYDYLFERSYIEEN  
KKTWCPYPGCECAIEFEI  
GSDDYSVIYSNCDMVAKWKYVNEEESANTNWFRTFTKKCECDRSIEKNMGMHMTCRCGY  
QFCWLCFKE  
WGVCASRCNRYEKKEVTNAKKKIERYTHYERWLSNGKSKDKALNDLKEMKEEGLKKLS  
DDNSLHKEELGFII  
EAWKQIVECRRVLKWTYAYGFYLPKEEEAKTQFFEYLQGEAEAGLERLHHCVEKDLMK  
HLGSDMDYTDKGSY  
KKFANFRSRVIGLTKITRNYFEKLVMALENGLEDVTNNPTKKIEQPMSSNSTSNMIMW  
MCDRCTFLNEDIHTVC  
QMCIED

>SIRBZ2

MLVKGRAEKIMTLMRTRNGKQPSTNSTASSKHILVPGGGHTARANNLDIREDNTVRTSK  
SPFEAWGVKFMESK  
EKPVATRSFTLGPQFLQRAGVNSTSSSNLQLAGGRKLINVGGSVKNLANAHVDGSDKLT  
LSKTPHVPGSDNL  
TVSKTPHMAGMSSTTSSSNLLLAGGRKLMNIEAGSAKNLASIHVDGSNNLTMSRTPH  
VAGSNNLTLSKTPHVL  
DDNDLGEASSATGASLTQKFIADFEGWACDSCTFLNADSTTCLMCSEDASGSWECEKCT  
FLNKKHASTCQICE  
HRK

>SIRBZ3

MASRFISLLGTPPFTFLNHLRCPFLHLRLACGSRRFTAYSHPHISPLSPSQQFHAQPIN  
NNTPLDSSSSSSSFT  
SHPWPEWRSLITLLTGNDQLPPAVEDSDSFVTYEELSQDFLRAATLCLDFARERP  
NFIGLLSRRDIEAVVSN  
GTPFLFKGALETARRMRAFLGIDGSTVLDHGNANTVDLMKYILCYASKPSVSSEKNSLY  
SRDLIESSCSRLLREL  
VEVSCGAPAVNLPPAEQYDFSGRYQTTPRPIRQNI  
VMKRGDWICQKCNFMFARNNKCEEP  
RPRRQLTGGEWEC  
PQCYFFNYGRNVVCLRCDFGRPAGASPRTHSSAEDGYNGNSAYSNGMDLKLAE  
NEEKAQRWFSKISQ  
MKNASDMDSAAADEDFEIMPPRKGENKFVVSTRKTP  
LERRLANTQYERNFGYNGIPEGNTLTGGAH  
SVLATSMKQ  
NMDQNSGTSHKGVAADKNSESVIQHSGRGSNYVPFVPLPKDMFQKNNPTSVMDEK  
VKEEVGSHTPEVSHQT

CSASLGNDFGKSMKQFQSNLLSEEKEREQAESWFKKIAELHDVKDLSSSISDDDFEIMPMRKGENRYVV  
SKKKDRSLTSPMYKRQVAMEQANNSSFPVFPFPPGYFAKRDTQQEDITGSSSLSRVGTSTFSNSDHKGSPM  
NPLSKTYSEKEDAEKTHHESDDAGFLFRDTITAQTPVDQFTNSRFASPSFGDQGVPCVGNVETSLALDACRT  
NSKDRRNSVNEDEVSLAETLGVGSTKLPRNQNRNGWTGKSLEGSVAVKETDLLDMSEEAKAERWFQ RVAQIKD  
ISELSQIPDEDFPSIMPMRKGVNRFVVS KRKTPLERRLTSTQYRRNLPVVTSDPMKRERDNNDK

>SIRBZ4

MVLSLLLLRLSSCRTKPYLFTLSQTKTFSSFPSDKPSSLSARMSFVFDQIDAIEKERSEKDQTLQRIRAWRESKK  
GNQTQNAQANQDPVGSSSGFSDVGSSSEMELESRKNDGFEGSGGLMSKKVELMHPWPEWIELMERLVQQN  
YFDHKKRDEDKMIENLGFSLTGVAEDEGDFTRDWKTAQTAVLNFGKDRFDMRLSLSRQDLQILVGYGCPSTD  
KKVVFSSKLLRKHVHLDGEDVCSSCNLRSSCERAYLLTNKEDEARTMDVMRVLLTFGFNAINGSVDNESLMKKK  
SVKTVVRKLLHEIVKLSAVPIDPNLPPPVKPPKVPKQPPPPRKRVRGRDDIEMKKGDWLCPKCDFMNF AKNT  
ICLQCDANRPKRQLLPGEWECSCNLFNYYRRNVVCFHCECKRPVDDYMVAQQQERLQGSRTQMDKISR RQD  
VSNAWNFDDEDDDES DGADIAAFETADSRKLGEDFPLDRQERRDTSRSNEDGFHKSSRPPKGYETEPAPGKPG  
VGFNDFDDEDDVDSYEIDSNGANRSSKIDFSIEVNSESEDIDSVDLTVGRRNSSPASDAHFRQRHQKGAF  
RGSEDAEVDFTDDELPIKTNMRSSQVSYSKPRSRNKGAKSFDSDDDYGLSSDSDRDRFSQQNKG NKWGSR  
KEFGRRSSSYSEDEPFSDSESNGRSFHKNKQRGGKAGQNGRWDSSEVGGDGIRDKRSSFRDNMKRSPRDLR  
GSSRRSQDNGYNDYRSRGREESYKQQRGRNSNYGDQSDSYLDDERHRRPRINVR

>SIRBZ5

MVSISKILFTLLPKIKLNLNPTMSWSCSSCTFLNPPSQKSSCQICLSDSPSSISSDPSISVQPKWPCKACTFMNPY  
HSISCEICGNRVASGLATLETEDDDDDLLSSSVGNVFLPLRPCNKGKVITRAPIMVQDDVKDSVRARCANAANK  
RKNREEPSGVEDDEVDAAAMGYRGIAAATAIEQNSVEQEPGKTFSTSKSVLKILTYNVWFADIE MNKRMK  
AIGNLISLHKPDVICFQEVTP EYDIFQHSGWWKMYSCSISNVMELTIGYFCMQLSKLAVKSYSCKPFSNSIMGR  
ELCIAEIEVEKDTLLVATSHLESPCPGPPKWDQMYSKERVQQAKEAVELLDRKRN VVFCGDMNWDDKLDGQ  
FPPTDGWIDAWGKMKPEEIGWYDTKSNKMLSANRTLQKRLDRIACKLQDFCITDVKMIGKDAIPNLTYIKEK  
VKSEVKKLTLPVLPSDHYGLLLEIS PQ

>SIRBZ6

MGREGDWECCSGNKNYAFRCFCNRCKQPRLLVDNKTPHDSKWFPRI GDWICTGCTNNNYASRECKCKCGQ  
PKEVAAMPAIAPGASLP SHPNYFARTQGGMEQRLKIGFLGHGALQQLPLSSNWSLGEAGQYQS QPADRYRL  
QTPGV PYASQTNQLLPVPNGWRNGDWLCSG FHNYSRAQCKKCNASAPPASSSSLATTPITALGTRKRLASEEL  
VHDWDNKRNLNAGHTFGYQQGYPGA EWMGDSGGNQLTAIPTIFLNENSMVLPLQANMQIPRVPAAPTLLGK  
GAKQWRDGDWMCTNCSNHNYASRSNCNRCKSERDVPTQPVTV A

>SIRBZ7

MSASRLFFLLGASTVRNCNKPTNISSPFPFRFSKPLLCPVVRFRSYNCTSATLETKTIEPLVSPRNHPWPEWVAF  
VDRLKSKGYITEKSTSTGEDGDGSIYTD MNLLKDACLNFSRDRSDIFKKLSTQDMQKVVEKGCPNLF RKVVNSA  
KRLRIHLNLDEGEVCGACNFRGSCDRAYLILKESEG VARTVDIVRVLLIYAFDSAVISSGAMP PGSELIEVSARQLLS  
ELVELSETPIDPDHLPAPKASPRKKESVGSRTD GLEDVEMKRRNSTGLEGEMPKRNVEMKQGDWICSQCTFM  
NFARNAQCLRCKSKGPSRDAPVVKEMKKGDWNCPQCTFMNFASNTKCLRCQEQRPKRQLNPGEWECPSCD  
FLNFRSNMVCKKCTCERPKDAKTQSKYEEQLWTKPY

>SIRBZ8

MILVQKCVTNSEGNEISESSKMSNLTG GKTETNLPNQSGVALCQDLNGRLDGVGS AVVCDYTCHNDGQSGEV  
SQLGTRDSGISGLNADPAAITSAKHESDMTLED MYNARYNFEDDDDDSDWEPSEKQIEVLKWFVCVNCMI  
NVEDVGNCEVCGEHRESGILRHGFFASPYLPVEDINQDEL PVTEDSEDSCQSSLSSTAVGFDERM LLHTEVVL  
KSHPHPERPDLRTIAASLATAGIFPGKCHPIAREITREELQMIHSEENIEAVDNTKRMHASYFTPD TYANEYSA  
CAARLAAGLCADLASAIYSGCVKNGFALVRPPGHHAGVKQAMGFCLHNNAIAASAAQAAGAKKV LIVDWD

VHHGNGTQEIFERSKSVLYISLHRHEGGRFYPTGAADEVGSMGAEGYCVNIPWSRGGVSDNDYIFAFEQVVL  
PIALDFNPDFTIISAGFDAARGDPLGCCDVTAGYASMTQMLSALSGGKLLVILEGGYNLRSISSSATAVIKVLLE  
SPVIDIDKAVPSKAGLRSVLDVLKIQMNFWPTLEANFTKLHSQWGSYAFQDTREQSKRRRTGLPIWWRLGRK  
RLLYRVLSKQLRAKSSCNFSC

>SIRBZ9

MLFECFQVDNRNSSAAKRARTDGGREDDWTCPSGCVNFNFSFRTTCNMNRCTQSRPADHNSKSAVRPMHA  
PQSYSPSAAYVGSAGPSSMYMGVAPYGGSLFNGPSMPAYDVPFAGGSAYHYNFGSRLSGGSPYRPVHLSAPPP  
YTGGMGNGGMYGVPLMDRYGVALPMAAPMAPRPGFYDDNSQKKDGTDRDNDWACPKCGNVNFSFRT  
VCNMRKCNTPKPGSQVPKPVKNTKPDTPDGSWKCEKCNNINYPFRTKCNQNCGAKEKPSEAKKSPSQSADEN  
DQ

>SIRBZ10

MEFSFTWDATSFRLHTVTEYYRLDRKAPVTAALVAANTIIYVRPTFLHSILPTINQVWFNPSSFLRCDTLFVSVLA  
DHKANSFPELHVLVFRSCVILFCYYLMNTYDFACAAQGPETILPVSTLPFEWFSLILQYAHFCGRGFNWRHQ  
EVQNLHRQLQALVAMSQGITLLPEKSLFFNYERPYYQEYAVGFSGLFAMKIILNAQSHDYTYVHGLLVPTRYA  
AWAELILIQMFVPGVSFLGHLGAILAGLLFLCLKASYSGANPLRTIIRGFGHALNWPLMFMNCLFRRQIIGGRGT  
VGGRQTRDTSQMWRCQGCTFDNSGWLNVCDMCSTSRDDEVQDLSDDELRRRIQRYGR

>SIRBZ11

MGSREKDQPTPHLSSLVVRPTDSGGENGSGGAGSDYEPGEVRRDAPPYSRSDRFSATHGYRAHAGSVSPVRH  
RNADHRYSTDFDHSGGPPRSHGFGSGRDPGRHRDYSPPYGRGRHAGRFVGRSYDGPYGGQRVRGEGLPRS  
NPNVRPRDGDWMCTDPLCNNLNFARRENCNKCKRPRYAPPGSPRRGYSPPPHHRNPGPPINRSPGRFVNG  
YRSPPRGWARDPRDFRAGVPHSRFEGRFADPPIRRDRPAFADADGRDRSRFERPPALDWGHRERGRDSYLS  
ERKGYERRTPSPPHPPVLPARGQWPRDTRERSRSPVRGGPPPKDYRRDVYMGRRGRDDRRVGRGAY

>SIRBZ12

MERGRGQWGSVFRGMIPLGLHTLSEYSRLDRKPPITAALLAANTIIYLRPKFIHPFLPTIDQVWFNPHLILKYTD  
LKRFFLSPFFHVNESHLVYNMLSLLWKGILQLETSMGSAEFASMVATLVAMSQGVTLAKSLLFFDYERPYYNE  
YSVGFSGLFAMKVIVNSQSDYTSVHGLMVPTRYAAWAEVLVQMFVPGVSFLGHLGGILAGLLYLQLKASYS  
GLNPVRQFMRGFSHALSWPLRLVKSFLRHRPRITGRGTAGARIADTLHTWRCDACTFDNSGRLNVCEMCGT  
GRTGDAPSSPGSTSEIHDLSEELRRRRIQRFGR

>SIRBZ13

MLKMIFASSNKIIQNSSISISISNFHTKNSAIQFVLEEGKTLQSQQTTKQNEEVEFSRKPNSGIQTPQLWPEWV  
NLMDKLLKMGCFDGFNPFGNAQWDANLIRTAFLNFRHRFDLIRYLSQDIEVLASCGCPSMDRKVVNSGK  
RLRLLFGIEEGNVCSFCILRGSCERAYAVPHKDQGGRTVDVMRLLLTYGLNPITGAVENTKPSLNKRVEESARKLLK  
EIVNFSSEELFCETKKSTNPWNPSVQRDHEEGQINALRKHGDWVCPECNFLNFSRNAKCLRCNGLNHERLNKL  
RQEQDHLPLKKGDWICSKCHFMNFAKNTRCLQCTEKPPKRHLNPGEWECESCNYINFKRNTVCLKCDHRRPK  
ASSCAGSSCGSANQSRISRTRPYFGELENEETDEEWQLIESEREDRLSSMPENEVDFPVLGGNSELSRDAKKQ  
ERWKTGNKRENGDELNKKYFQNSGNEEMDEWFGHKNV

>SIRBZ14

MSRPGDWNCRSCQHLNFQRRDSCQRCGEPRHGGAEHFGSNCFGGGGSSSPFGFSTGPDVRPGDWYCN  
VGNCGAHNFASSCFKCGAFKDESSAGGCGGGSSFDSDHMMSSRPRGFGFGGASGGSRSGWKSGDWICT  
RLGCNEHNFASRMECFRCNAPRDLAGNKSSY

>SIRBZ15

MDPGRYGP HQGWENNSALEGYRGVHEPDFRAGGSFDDRRFLDDRFSRDGVYPRGAYHRDILDGEHYPHPPA  
AVGHWPOQTRRRSYEEVYPVERDSRRHEKPPARYVGREHDDPYDDYDYKHRMAHPNREDSRERDYEYSRYSD  
SDYERGSRRDDNWRRRRESHERERDKESSRERDPSPYRRHERSRSRGHDDRRLSRSPRSRSHSRSHREDSYD

DGRYDRSERRRRDRDDKRYHDNYSVAPSATVVVKGLSQKTTEEDLYQILAEWGPLRHVRVIKERNSGISRGFADFID  
FPSVDAAQAMMDKLGDEGLVVDGRKLFFEYSSKPTGGPGGPGGLDNASRSNHGHRSMTPVPSDWMCTICG  
CVNFARRTSCFCQNEPRTDDAPPADMASSNSSSLGRRGEAGPTHVLVVRGLDENADEEMLRYEFSKHAPIKDL  
RLVRDKFTHVSRGFAFVHFYSVEEASKALEATNGTTLEKNGQLLRVAYAKSILGPGSGTSQASSLAAAIEAATFS  
QQYDAVGWAPKEYNPDDKLSTGGQEHSGEVAGQNSAPQSGFVWDEASGYYYDATSGFYDGNGLYYDGN  
NGIWYTYDQKTQQYLPCTNQENKPAAGQTETAKSSDGSNTKKVIISAPASTIAGEKAASLPDAIQAAASAAIA  
AEKKEKEKAKEIKLASKSSILANKKKMSNVLSMWKQRSHEGQAPRVALEDSQTVGEDRSNSVGPVVKTKLKA  
PLTTRENPTACSGLVGSSNFQSVSSETQDRPRSLTNSSGGTLKGVIRGSLGVVKSGLTYGSSGSASTSHTMPPT  
SGPTSLINADASAAPFRTDASALGSYTPPVAGSKRRFSEMPSPPPSIKEQSQTAYRDRAAERRSLYGSSSAF  
GDDASEHGDSNRDSTFRRGVFDPTFPFPGVGGGSAEANSQSFEVITADRAIDESNVGNRMLRNMGWQEG  
GLGKDGSGMVEPVQAQSTGHRAGLSQQSKKVDPNLEAQSGDSYKTLIQKAIARFREMS

>SIRBZ16

MASEDELMMDATDDGESFDDDFYSGGDVHDDSDDDVMDYDFIDNDSDDSDTVIAHHRSQSNYSILNEA  
DIHKCQESITKISTVLSIPRVAAGILLRHYNWSVSKVNDWFADGKVRRIVGLLENHVPLPDGEELTCGICFDV  
YPRKEISAAACGHPFCFTCWQGYISTSITDGPGLMLRCPDPSCSAIGLDMINKLASDDDKKYNRYFIRSFVE  
DNRKTKWCPAPGCDYAVDYIVGSGSYDVTGCSYSFCWNCTEETHRPVDCGTVSKWILKNSAESENMNWILA  
NSKPCPKCKRPIEKNQGCMHITCTPPCKFEFCWLCLGPWTDHGERTGGFYACNRYESAKQDGVFDESEKRRE  
MAKNSLERYTHYERWATNQSSRQKALSDLQMQTVHLEKLSDKQCQPESQLKFIEAWLQIVECRRVLKWTY  
AYGYLPEHEHAKRQFFEYLQGEAESGLERLHQCAEKELQGYLDAEGPSREFNEFRTKLAGLTSVTRNYFENLVR  
ALENGLSDVDGHGAYSRAASSKSLGGGSIKKGGRGKATSRSSSRNIDDSGHWSCEYCTYANVRSATACQM  
CQQR

>SIRBZ17

MASYSKGSTLNGSVYVCNLPLGTDEDMLEAIEFGTIGVLKKDKRSGRPKIWLRYDKVTNEPKGDATVYEDPH  
AALAAVEWFNNKDFHGSMMIGVFIAESKNKDEASYSVNQISEPNLNSGLAVLDEGSNDIDGGGGRGRGRGDA  
SAKAWQQDGDWLCNPNTSCTNVNFAFRGVCNRCGTARPAGAGGGGAGAAGRGRGRGSQDPGAPGRAVGG  
PPGLFGPNDWACPMCANINWAKRNKCNICNTNKPQHNEGGVVRGGRAGGYKELDEEIEETRRRRREAEDD  
GEMYDEFNLLKKFRAKTQRAEAAQSLPPGVGRAGWEAEELGVAERDRKERSRERSRDYDDRERARHRSR  
ERDRGRDRDRSYDYDRDREYGRDRDRERNKYRH

>SIRBZ18

MSRDGDWMCAACQHLNFKKRDACQRCSCPXYASPADVAMYGLNKTEVLAGDWYCSGMNCGSHNYASRTS  
CYRCGALKSDYYGIGVGMMAPTYGYDSSALPGWKSGDWICSRLGCGMHNYASRAECYKCKTPRDFGGDM  
RESELY

>SIRBZ19

MSREGDWMCSACQHLNFKKRDACQRCSCPXYATSADVAMYGLSKTDVLAGDWYCSAMNCGSHNYASRTSC  
YRCGSSKSDYYGMGVGMMAPAGYGYDASAIPGWKSGDWICSRLGCGMHNYASRAECYKCKTPRDFGEPSAI

>SIRBZ20

MELNFLAFQLLHKVTVFNIYGQKMSMEGDWMCAACQHLNFKKRDACQRCSCPXYATTTDVYMYGLNKTE  
VLAGDWYCSAMNCGTHNYASRTSCYRCGALKNNYYGIGTGMTASTGYGYDASACPGWKSGDWICSRLGCG  
MHNYASRAECYKCKMPRDFGEPSM

>SIRBZ21

MNLGDLNKVWEIKALKRKPKEEANKILEKIAKQVQPIMRKHNNRVKLLSEFCPKRAALLGLNVGAGIHVKLRL  
RRPNNDDEEFYPYNEVLDTMLHELCHNAHGPHNASFYKLWDELKCECDLIAKGISGTGEGFDLHGRQLGGRHP  
QPSMSSLRQTAAAAAENRARLKSLLPSGPRRLGGDHSIKSALTPIQAAAAAAERRLQDNIWCGSELCELDLDE  
TSDALPETLPLGHTSDRSKLSNGFDSLSSKVTSRKRRESNSVSSSKSLHGHTVTKPVSKPLSNHDKIEAHRVGQV

EGKSHNVASRGYTESFIDLTGNSSSSTSIHGHDDLHGPNESMMWECLMCTLLNPPLAPLCKVCQTQKPKDVDD  
RNSIWSCKFCTLDNSLKLDQCTACGEWRYSHGPPVATSAPNLGT

>SIRBZ22

MGLIMRKTFITIGLSSSLCPLHTKSLILIGRVLETNTKQELVKVDIWRCISICTFDNRASMNVCDCGNPKQELVKA  
GVWCCPICTFDNEDTTNLCDMCGVLRNPLIKGGGGKASAATSDKVEQSNVSKKEIAGEVKKELVSEPTSSSAS  
TAKVRRDNMKDRGSSIKSRGYHGVMSNVGNMSVSSNPRNAESRIAPSRSQTKPQKIVCTDQLEDKLNQLNLAI  
VGHVDSGKSTLSGRLLHLLGQISQKEMHKYEKEAKQQGKGSFAYAWALDESAEERERGITMTVAVAYFNTKSYR  
VVLLDSPGHRDFVPMISGATQADAAILVVDASIGAFEAGIDVSGGQTREHAQLIKSFGVDQIIIAINKMDVVGY  
SKERFDTIKNLGTFLRACKFKDSLVLWIPLSAMENQNLVTSPSDARLLSWFQGPCLLDAIDSLQPPQRDYSKPIL  
MPICDLVKLPSQGQVSVCGKLETGALQTGDKVLVIPSREMATVRSLEHNSQVCNSAKAGDNVTVNLQGIDVNR  
VMAGDVLCHPEYPIAVTNHLELKILLDIAVPILIGSQLEFHVHHVKEAARVVRISSLDPKTGKETKKSPPRCLLAK  
QN
