# Supplementary material
Source: MDPI journal article supplement (https://www.mdpi.com/2311-7524/8/11/985)
Supplement: s1 [file s1]

Appendix S2. The coding sequences of identified 22 SIRBZ genes in Ailsa Craig.

>SIRBZ1

ATGGATTCTGATCATGAATTTTACGATATGTATTCTGCTGATGAAGAGGAAGATTCCAAC  
AATGTTGATGAATCCAATATAGTTACTTACGAACAAAAAATTACAAAATTTGAAGGA  
TTTCGATATTCGTCAGCTCGTAAAAGAAGATATATCGAAAATCTCAGCCATCTTATCCGT  
CCCACGGGACGTTTCGTTAGCACTCCTACGTCGTTATAATTGGAAGGTTGATCGAGCTA  
ACGAAGAATGGTTTGCTAACGAACAAGAAGTTCGTAAATCTATAGGTATGTTTTTATGC  
GATAACGATAATAATACTACGTTCCAGTGTCGAAAAATCGAAAAAGAATGATAATAT  
TGTGAATTGTGGTATATGTTTTGAGGAATACAATGATGTGGTTTATGCCACGTGTAGAAA  
ACATCCTTTTTGTAAAGTTATGTTGGGAAAAATATATTGGTGCATCGATTAATTATAGTGGC  
CCTAATAAATGTCTTGCTTTACGATGTCCCGATCCATCGTGTGAAGCTATGGTAGGTGAA  
AGTATAATAGTTGAATTAGCATCGGAGATAGATAAATCGAAATATTATGATTATTTATTC  
GATCGTATATCGAGGAAAATAAGAAGACTAAGTGGTGTCTTATCCGGGATGTGAATGT  
GCTATCGAATTTGAGATAGGGAGCGACGATTATAGTGTGATTTATTCAAATTGCGATATG  
GTAGCTAAGTGGAAGTATGTAAATGAAGAAGAATCCGCAAATACAAATTGGTTTAGGA  
CTTTCATAAAAAATGTCCAGAGTGTGATAGATCAATCGAAAAAATATGGGATGTATG  
CATATGACATGTAGATGTGGATATCAATTTTGTGGTTATGTTTTAAAGAATGGGGTGTT  
TGTGCTAGTCGATGCAATCGATACGAGGAGAAAAAAGAAGTAACGAACGCGAAGAAG  
AAGATTGAAAGGTATACACATTATTACGAGAGATGGTTATCGAATGGAAAATCGAAAGA  
TAAGGCTCTGAATGATTTGAAGGAGATGAAAGAGGAAGGGTTGAAAAAGTTGAGTGA  
CGATAATTCGTTACACAAGGAAGAATTAGGGTTTATTATTGAAGCTTGGAAGCAAATCG  
TCGAATGTAGGAGGGTTTTGAAATGGACGTATGCTTATGGATTTTATTACCTAAAGAA  
GAAGAGGCGAAGACACAATTTTTTCGAGTACTTGCAAGGGGAAGCAGAGGGCGGGTCTA  
GAACGACTTCATCATTGTGTGGAGAAAGACTTGATGAAACATTTAGGGTCAGATGAGA  
TGGACTATACTGATAAAGGATCTTATAAGAAATTTGCTAATTTTCGATCGAGAGTTATTG  
GGCTGACAAAAATTACTCGAAATTATTTGAAAAATTGGTCATGGCATTAGAAAATGGA  
CTAGAAGATGTGACTAATAATCCAACAAAAAATTTGAACAACCAATGAGTAGTAATA  
GCACAAGCAATAATATTATGTGGATGTGTGATAGGTGCACATTTTTGAATGAAGATATTC  
ATACAGTTTGTCAAATGTGCATTGAAGATTGA

>SIRBZ2

ATGCTCGTCAAGGGAAGAGCTGAGAAAATTATGACCCTCATGAGAACTAGAAATGGA  
AAACAACCTAGCACTAACAGCACTGCAAGCTCGAAACATATCTTAGTTCTTGGTGGG  
GGACATACGGCTAGGGCCAATAATCTTGATATAAGAGAAGACAACACTGTGAGAACA  
TCAAAAAGTCCATTTGAAGCTTGGGGCGTCAAATTTATGGAATCAAAAAGAGAAACCT  
GTAGCCACAAGGAGTTTTACTTTGGGCCCAATTTTTACAAAGAGCTGGGGTGAAC  
AGCACAACCAGCTCGAGTAATTTACAGCTAGCTGGGGGCAGAAAGTTAATCAACGTT  
GGAGGGGGCAGTGTGAAAACTTGGCAAATGCGCATGTGGATGGAAGCGACAACT  
CACACTGTCTAAAACTCCACATGTGCCGGGAAGCGACAACCTCACTGTGTCTAAAC  
TCCACATATGGCTGGGATGAGCAGCACAACCAGCTCGAGTAATTTACTGCTAGCTGG  
GGGCAGAAAGTTAATGAACATTGAAGCAGGCAGTGCGAAAACTTGGCAAGTATAC  
ATGTGGATGGAAGTAACAATCTCACTATGTCTAGAACTCCACATGTGGCTGGAAGCA  
ACAACCTCACTCTGTCTAAAACTCCACATGTGGCTGGTAGCAGCAGCAGATAAATG  
CTGCGGAAAAGCACAGGAAAACAAATTCTGGGGCATCCTTAATCATAAAGTTGGATG

ACAATGATTTAGGAGAGGCATCTTCTGCAACAGGAGCATCATTAACACAAAAGTTTA  
TTGCTGATTTTGAAGGTTGGGCATGTGATTCATGCACATTTCTGAATGCTGACTCTACC  
ACAACATGCCTGATGTGCAGTGAAGATGCTTCTGGCAGTTGGGAATGCGAGAAGTGT  
ACGTTTCTCAATAAGAAGCATGCTTCCACATGCCAAATATGTGAGCACCGTAAATGA  
>SIRBZ3

ATGGCTTCGAGGTTTCATCTCCCTCCTCGGAACTCCATTTCCCACATTCCTCAATCACCT  
ACGATGCCCCCTCTTTCCTCCATCTTCGTCGTTTGGCATGCGGTTCTCGTCGCTTCACAG  
CCTACAGTCACCCCCACATATCTCCTCTTTCACCCTCTCAACAACAATTCCACGCCCCA  
ACCCATCAATAATAACACCCCCTCGACTCTTCTTCTTCTTCTTCTTCTTTTACCTCTCA  
CCCTTGGCCTGAATGGCGTAGCTTAATTACTCTTCTTACTGGCAATGACCAGCTACCT  
CCTGCAGTGGAGGACTCTGACTCCTTCGTCACATACGAGGAGTTGTCCCAAGACTTCC  
TTCGTGCTGCTACCCTCTGCTTAGATTTTGCACGGGAGCGCCCAAATTTTCATAGGGTT  
GCTTTCAAGGAGGGGATATTGAGGCTGTTGTATCAAATGGGACACCATTTTGTTCAAA  
GGTGCTCTGGAAACGGCAAGAAGAATGAGGGCATTCTTGGGTATTGACGGGAGCACT  
GTGCTGGATCATGGCAACGCTAACACGGTTGATCTCATGAAATACATATTATGTTACG  
CGAGTAAACCTCTGTTTCTTCAGAAAAAACTCCCTCTATAGCAGGGACCTTATAGA  
ATCATCTTGCCGGAGTCTTTTGCCTGAGTTGGTTGAAGTGAGCTGCGGAGCTCCAGCA  
GTCAACCTGCCTCCTGCAGAGCAATATGATTTTTTCAGGTAGATATGGACAAACACCA  
AGGCCTATTAGACAAAATATTGTAATGAAGAGAGGCGACTGGATATGTCAAAAGTGC  
AATTTTCATGAACCTTTCGCAAGAAACAACAAATGCCTTGAATGTGAGGAACCTAGACCA  
AGGAGACAGCTGACAGGCGGGGAGTGGGAATGCCCTCAATGTTATTTCTTCAACTAT  
GGGAGAAATGTTGTCTGTCTGAGATGCGACTTCGGACGACCAGCTGGGGCTTCACCT  
AGAACTACCCACTCCAGTGCGGAGGATGGGTATAATGGGAACTCTGCGTATTCAAAT  
GGAATGGATCTTAAGTTGGCTGAGAATGAGGAGAAGGCACAGCGGTGGTTTTCTAAG  
ATTTCTCAGATGAAGAATGCCTCTGATATGGATAGTGCAGCAGCTGACGAAGACTTC  
CCTGAAATAATGCCACCGAGGAAAGGAGAAAAATAAGTTTGTGTTAGCACAAGGAAA  
ACACCCTTGGAAGGAGGTTGGCCAACACTCAGTACGAAAGAACTTTGGTTACAAT  
GGTATCCCAGAAGGCAACACTTTGACTGGTGGTGCACATAGTGTCTTGCCACGTCAA  
TGAAGCAGAATATGGATCAAAATTCTGGAACAAGTCATAAGGGCGTTGCTGCAGACA  
AAAATAGCGAGTCGGTCATTCAACATAGTGAAGAGGTTCTAACTATGTTCCTTTTGT  
GCCATTACCAAAAAGACATGTTTCAGAAAAATAATCCAACTTCAGTGATGGATGAGAA  
AGTAAAGGAAGAAGTTGGTGTCTCTCACACTCCTGAGGTCAGTCACCAAACATGTTT  
AGCAAGTCTTGGCAATGACTTTGGGAAGTCCATGGAGAAGTTCCAGTCAAATGATCT  
ACTCAGTGAGGAGAAAGAGAGAGAACAAGCTGAGAAGTCAGAAAGTTGGTTCAAGA  
AAATCGCGGAGCTGCATGATGTCAAAGACTTATCGAGTTCCATCTCCGATGATGACTT  
CCCAGAGATTATGCCAATGCGTAAAGGAGAAAAATAGATATGTAGTTAGCAAGAAGA  
AAGACCGGTCTTTGACTTCTCCAATGTACAAAAGACAAGTGGCCATGGAGCAAGCAA  
ACAACAGTAGCTTTGTCCCATTTGTTCCCTTCCCTCCAGGCTACTTTGCGAAAAGGGA  
CACACAACAGGAAGATATCACAGGTTTCATCCTCTCTGTCTAGGGTTGGAACCTTCATCT  
ACATTTCAGCAACTCAGATCACAAAGGGATCACCCATGAATCCTCTTTCCAAAACCTATA  
GTGAGAAGGAAGATGCAGAGAAGACACATCATGAGTCGGATGATGCTGGGTTTTTGT  
TCAGAGATACTATTACTGCACAGACTCCTGTTGATCAATTCACGAATTCAAGGTTTGC  
AAGTCCAAGTTTCTCTGGGGATCAGGGGGTCCCTTGTGTTGGAAATTCAAGTTGAAACC  
TCTCTTGCTTTAGATGCTTGCAGAACTAATAGTAAAGACAGAAGAACTCCGTGAAC

GAGGATGTATCCTTAGCCGAGACTTTGGGAGTAGGTTCAACCAAGCTGCCTAGAAAC  
CAGAACGTCAGAAATGGATGGACAGGAAAGAGTTTGGAGGGGTCTGCTGTGAAGGA  
AACAGATCTGTTAGACATGTCTGAAGAAGCCAAAGCTGAGAGGTGGTTCCAGCGTGT  
TGCTCAGATAAAAGACATATCTGAATTGAGTCAGATCCCAGATGAAGACTTCCCATCT  
ATTATGCCAATGCGCAAGGGAGTTAACAGATTTGTGGTGAGTAAGCGGAAAACCTCT  
CTTGAGAGAAGGTTGACATCTACTCAGTACCGGAGAAATCTTCCCGTTGTGACTTCTG  
ATCCTATGAAAAGAGAAAGGGACAACAATGATAAATGA

>SIRBZ4

ATGGTTCTTTCTCTTCTCTCCTTAGACGCTTATCTTCCTGTAGAACAAAACCTTATCT  
TTTCACCCCTTTCGCAAACGAAAACCTTCTCTTCTTTTTTACCTTCAGATAAGCCTTCTT  
CTTTATCAGCTCGCATGAGCTTCGTATTCGACCAAATCGATGCTATTGAGAAAGAGCG  
GTCAGAGAAGGACCAAACCCTTCAACGAATTCGGGCCTGGCGTGAATCCAAAAAGGG  
GAATCAAACCCAAAACCAAGCCGAGAACCAAGACCCGGTTGGGTCAAGTTCGGGTTT  
TTCTGATGTGGGGTCATCGGAAATGGAGTTGGAATCAAGAAAGAATGATGGGTTTGA  
AGGTAGTGGTGGATTGATGAGTAAGAAGGTGGAATTGATGCATCCGTGGCCTGAGTG  
GATCGAGTTAATGGAGCGTTTGGTTTCAGCAGAATTACTTTGATCATAAGAGAAAAGA  
TGAGGATAAAATGATTGAGAATTTGGGGTTCAGTTTAACTGGTGTGCTGAAGATGA  
GGGTTTTGATTTTACCAGGGATTGGAAGACTGCTCAGACTGCTGTTCTCAATTTTGGC  
AAAGATCGTTTTCGATATGTTAAGGTCATTGTGCGAGACAGGATCTCCAAATTTTGGTTG  
GTTATGGATGCCCTAGTACAGACAAGAAGGTGGTTTTTTCTTCCAAGTTATTGAGGAA  
ACACGTTTCATCTGGACGAAGGGGATGTTTGCAGTTCTTGCAATTTGAGGAGTTCTTGT  
GAAAGGGCATATTTACTTACCAATAAGGAGGATGAAGCAAGGACAATGGATGTCATG  
CGTGTCTTATTGACTTTTGGTTTTAATGCAATCAATGGATCAGTTGATAATGAGAGTC  
TTATGAAGAAGAAATCTGTAAAGACTGTTGTTTCGCAAATTGCTTCACGAAATAGTGA  
AGTTGAGTGCTGTTCCAATAGATCCAAATCTTCCACCTCCAGTTTTTAAAAAACACC  
TCCAAAGGTGAAGCAGCCACCTCCCCCTCCGAGGAAACGAGTCGGACGTGATGACAT  
TGAGATGAAAAAAGGAGATTGGCTGTGTCCAAAGTGTGACTTCATGAATTTTGC  
GAATACCATATGCTTACAATGTGATGCCAACCGGCCGAAGAGACAGCTGCTTCCAGG  
AGAGTGGGAATGTTCCAGTGTAATTTCTTGAATTATAGGAGAAATGTGGTATGTTTT  
CATTGTGAATGCAAGCGCCAGTTGATGACTATATGGTTGCTCAACAGCAGGAGAGG  
CTACAAGGATCCAGGACACAGATGAATAAAATATCTCGCCGGCAAGATGTTTCTAAT  
GCATGGAATTTTGATTTTGTGATGATGAGTCAGATGGTGCAGACATTGCTGCCTTCG  
AGACTGCAGATTCTCGGAAACTGGGTGAAGATTTTCCCCTGGATAGGCAAGAACGAA  
GAGATACTTCCAGGAGCAATGAAGATGGTTTCCACAAGAGCAGCAGGCCTCCAAAAG  
GTTACGAAACTGAATACCCCGCACCTGGGAAACCAGGGGTAGGCTTTAATGACTTTG  
ATGATGAAGAAGATGATGTGACAGCTATGAGATAGACAGTAATGGAGCAAACAGA  
AGTTCTAAAATAGATTTCTCGGATATTGAGGTCAACTCCGAATCTGAAGATATTGATA  
GTGTTGATGACACTTTGCTTGTTGGTAGAAGGAACAGTTCCCCCGCAAGCGATGCACA  
TTTTAGACAGAGACATCAGAAAGGGGCGTTTCGTGGTTCTGAGGATGCTGAAGTGGA  
TTTTGACACAGATGATGAGCTTCCAATTAATACTAATATGAGATCTAGTCAGGTTTCT  
TATTCTAAACCAAGATCTAGGAACAAAGGTGCCAAGAGTTTTGACTCTGATGACGAT  
TATGGCCTCAGCTCCGACTCCGATGATAGGGATTTTCAAGTCAGCAGAATAAAGGG  
AATAAATGGGGATCAAGAAAGGAATTTGGACGGAGAAGCAGCTCCTATAGTGAAGA  
TGAGCCCTTCTCTGACTCAGAGAGCAACAAAGGTAGGTCATTTCAAAAAATAAGCA

AAGAGGCGGTAAGGCTGGTCAAAATGGCAGATGGGACTCATCCGAAGTTGGTGGTGA  
TGGGATAAGAGACAAACGATCCTCTTTTCGAGATAACATGAAAAGAAGTCCCAGAGA  
CTTACGTGGAAGCAGCAGGAGAAGCCAAGATAATGGATATAATGATTATAGAAGCCG  
TGGACGTGAAGAATCTTATAAACAGCAACGAGGAAGAAATAGTAATTATGGTGATCA  
ATCAGATAGTTACTTAGACGATGAAAGACATAGGAGGCCAAGAATAAATGTCCGATG  
A

>SIRBZ5

ATGGTTTCAATTTCAAAAATCCTTTTCACTTTACTACCCAAAATCAAACCTCAACCTAA  
ACCCTACCATGTCTGGTCATGTTCAAGCTGCACATTCTTGAACCTCCTTCCCAAAA  
ATCATCCTGTCAAATCTGCTTATCTGATTACCATCATCAATCTCATCAGACCCTTCAA  
TTTCAGTCCAAAAACCCAAATGGCCATGTAAAGCTTGTACCTTTATGAACCTTATCA  
TAGTATAAGTTGTGAAATATGTGGCAATAGGGTTTCAGCTTCAGGACTTGCTACACTT  
GAAACTGAGGATGATGATGATGATTTGAGTTCTTCTGTTGGTAATGTGTTCTTGCCTTT  
GAGGCCTTGTAACAAGGGGAAAGTAATAACTAGGGCTCCTATTATGGTTCAAGATGA  
TGTGAAGGATTCTGTTAGGGCTAGATGTGCGAATGCGGCAAACAAGAGGAAAAACA  
GGGAGGAACCATCTGGGGTTGAAGATGATGAGGTTGATGCTGCTATGGGGTATAGGG  
GTATAAAGGCTGCTGCTACTAAAGCAATTGAACAATCGAATTCGGTGGAACAGGAAC  
CAGGCAAACTTTCTCAACCAGTAAATCCAAAGTGTTGAAGATCTTGACCTACAATGT  
GTGGTTTGCAGATATAGAGATGAACAAGAGGATGAAAGCCATAGGCAACCTTATTTT  
GCTGCATAAGCCAGATGTTATATGTTTTTCAGGAGGTTACTCCAGAAATATATGACATC  
TTTCAGCACTCTGGTTGGTGGAATAATGTATTCTTGTTCATTTCAAATGTGATGGAATT  
GACGATAGGGTACTTCTGCATGCAATTGAGCAAACCTGCAGTGAAATCCTACAGTTG  
CAAGCCATTTAGCAATTCTATAATGGGAAGGGAACCTCTGTATTGCTGAGATTGAAGTT  
GAGAAAGATACGACCTTGGTTGTTGCCACCAGCCATCTTGAGAGTCCTTGCCCTGGGC  
CACCCAAGTGGGATCAAATGTACAGCAAGGAACGTGTGCAGCAAGCCAAGGAAGCT  
GTGGAGCTGCTTGACAGAAAACGAAATGTAGTCTTTTGTGGTGATATGAACTGGGAT  
GACAAATTGGATGGTCAATTTCTCCTCAACTGATGGATGGATTGATGCTTGGGGAAAA  
ATGAAGCCCGAAGAAATTGGATGGACATACGACACCAAGTCAAACAAAATGTTAAG  
CGCCAACAGGACACTACAGAAACGTCTAGACAGGATTGCCTGCAAACCTGCAAGATTT  
CTGTATAACTGATGTTAAGATGATTGGAAAGGATGCAATTCCAAATCTCACATACATC  
AAAGAGAAGAAAGTGAAGAGTGAAGTTAAGAACTGACACTACCTGTTTTGCCTAGT  
GATCATTATGGTCTACTTTTGGAGATCTCTCCTCAGTAG

>SIRBZ6

ATGGGACGAGAAGGAGATTGGGAGTGTAGTAGCTGCGGTAATAAGAATTATGCCTTC  
AGATGTTTCTGCAATAGGTGTAAGCAGCCTCGTCTCCTTGTGACAACAAAACCTCCTC  
ATGATTCAAAGTGGTTTCTCGAATTGGCGATTGGATCTGCACTGGTTGACTAACAA  
CAATTATGCATCAAGAGAGAAGTGCAAAAAATGTGGACAACCAAAGGAGGTAGCAG  
CAATGCCAGCAATTGCAATCCCTGGAGCATCTCTCCCATCTCATCAAATTATTTTGC  
CAGGACACAAGGAGGTATGGAACAAAGGTTGAAAATTGGGTTCTTAGGACATGGAG  
CTCTCCAACAACCTTCCCTTGAGCTCTAACTGGTCTCTAGGGGAGGCTGGTCAATACCA  
AAGCCAGCCTGCTGATCGGTATAGACTGCTGCAAACCTCCTGGAGTTCCATATGCAAG  
CCAAACGAATCAGCTGCTTCCAGTTCCAAATGGATGGCGTAATGGTGACTGGCTCTGC  
AGTTGTGGCTTTCACAACTACTCTTCTCGAGCTCAGTGCAAAAAATGCAATGCTTCTG  
CACCTCCAGCTTCATCGTCTTCTCTTGCCACTACCCCTATTACAGCTCTTGAACAAAG

CGATTAGCATCTGAGGAACTTGTTTCATGATTGGGACAACAAGAGGCTGAATGCAGGA  
CATACATTTGGGTATCAACAAGGCTATCCAGGAGCAGAATGGATGGGGGATTTCAGGG  
GGAAATCAACTAACTGCAATCCCAACGATCTTCCTTAATGAAAATTCAATGGTGCTTC  
CTTTGCAAGCCAACATGCAGATTCCTCGTGTACCAGCAGCACCTACACTCCTTGGTAA  
AGGGGCAAAGCAATGGCGTGATGGGGACTGGATGTGCACTAATTGCAGTAATCATAA  
TTACGCTTCTCGATCAAATTGTAATAGGTGCAAAAGTGAGAGAGACGTACCAACTCA  
ACCTGTTACTGTTGCATAG

>SIRBZ7

ATGTCAGCTTCTAGATTGTTCTTTCTACTTGGAGCTTCGACTGTTTCGTAACCTGTAACAA  
GCCTACGAATATATCTTCTCCATTTTCTCCATTTTCGATTCTCAAAGCCGTTGCTTTGTC  
CTGTTGTACGGTTCGCGAGTTACAATTGTACCTCAGCTACACTCGAGACCAAAACAAT  
CGAACCATTGGTCAGTCCTAGAAATCATCCATGGCCAGAATGGGTTGCTTTTCGTGGAC  
CGTTTGAAAAGCAAAGGATACATTACAGAAAAAAGTACGAGCACGGGTGAAGACGG  
CGATGGGAGTATTTATACGGATATGAATTTGTTGAAAGATGCATGCCTTAACTTCTCT  
CGCGACCGTTCAGACATTTTCAAAAAGTTGTCCACCCAAGATATGCAGAAAGTTGTG  
GAGAAGGGCTGTCCTAATCTATTTCAGGAAGGTTGTTAACTCTGCGAAAAGGCTAAGG  
ATTCATCTAAACCTCGACGAAGGAGAGGGTATGTGGTGCTTGCAATTTCCGTGGATCAT  
GTGATAGGGCTTACTTGATATTAAGGAGTCTGAGGGTGTGCGCGGTACAGTCGATAT  
TGTGCGGGTCTTGCTTATTTATGCATTTGATTCTGCAGTTATATCTAGTGGAGCAATGC  
CTCCTGGTAGTGAGCTTATCGAGGTATCTGCAAGACAATTGCTCTCAGAGTTGGTTGA  
ATTAAGTGAGACACCTATTGATCCTGATCATCTAACACCTGCCCCCAAGGCTTCTCCA  
AGAAAGAAAGAGTCTGTTGGCTCAAGGACAGATGGTCTGGAAGATGTTGAAATGAAA  
AGAAGAAATTCAACTGGTCTTGAGGGTGAAATGCCTAAAAGAAATGTTGAAATGAAG  
CAAGGAGATTGGATCTGTTTCGAGTGCACCTTTCATGAACTTCGCCCCGAATGCACAGT  
GCCTGAGATGCAAATCAAAGGACCTAGTCGAGATGCTCCTGTGGTTAAAGAAATGA  
AAAAGGGAGATTGGAATTGCCACAAATGTACATTCATGAATTTTGCTAGCAATACCA  
AGTGTTTACGCTGCCAAGAGCAGCGTCCCAAGAGACAGCTGAATCCTGGAGAATGGG  
AGTGCCCTCATGTGACTTCTTGAACCTTCAGAAGCAACATGGTCTGCAAGAAGTGCAC  
TTGTGAACGTCCCAAAGATGCAAAGACACAGTCAAAATATGAGGAGCAACTCTGGAC  
AAAGCCTTACTAA

>SIRBZ8

ATGATCTTAGTGCAAAAATGTGTTACTAATTCTGAAGGCAATGAGATCTCAGAATCAT  
CTAAAATGAGCAATTTAACTGGTGAAAGACTGAAACCAATCTTCCAAATCAATCGG  
GAGTTGCTCTATGTCAAGATTTAAATGGAAGATTAGACGGGGTTGGCTCCGCGGTTGT  
TTGTGATTATACTTGTGATAATGATGGACAATCTGGGGAGGTGTCACAACCTGGTACT  
AGAGACTCAGATGGGATCTCTGGTTTGAATGCTGATCCAGCTGCTATAACTAAAAGT  
GCTAAGCACGAAAGTGATATGACCTTGGAGGATATGTATAATGCTCGGTATAATTTTG  
ACGAGGATGATGATGACAGTGACTGGGAACCATCAGAAAAGCAAATAGAAGTTCTG  
AAGTGGTTCTGTGTCAATTGTTCAATGATCAATGTCGAGGATGTTGGCAATTGTGAAG  
TATGCGGAGAACACAGAGAATCTGGGATACTCAGGCATGGATTTTTTGCATCTCCATA  
TCTGCCTGTAGAAGATATCAACCAAGATGAATTGCCTGTAAGTGAAGATTCTGAAGA  
TTCATGCAAGCAAAGTTCTTTATCATCCTCCACTGCTGTAGGGTTTGACGAGAGGATG  
TTGCTTCACACAGAAGTCGTATTGAAGTCTCATCCACATCCTGAGAGACCAGACCGTC  
TTCGAACCATTGCAGCTAGCCTTGCAACAGCAGGTATATTCCCAGGGAAGTGCCATCC

CATTCCTGCAAGAGAGATTACTAGGGAAGAACTCCAGATGATACACTCAGAGGAAAA  
TATTGAAGCCGTTGATAACACCAAGCGTATGCATGCCAGTTATTTACACCTGATACC  
TATGCAAATGAATATTCAGCATGTGCTGCCAGGCTTGCAGCAGGTTTATGTGCTGACC  
TTGCTTCAGCAATTTACTCTGGATGCGTCAAAAATGGTTTTGCTCTGGTTCGTCCTCCT  
GGCCACCATGCTGGTGTGAAACAGGCCATGGGCTTCTGTCTCCACAACAATGCAGCA  
ATTGCTGCATCAGCAGCTCAGGCGGCTGGTGCAAAGAAGGTGTTAATAGTTGATTGG  
GATGTGCATCATGGGAATGGCACACAAGAAATATTTGAGAGAAGCAAATCGGTTTTG  
TATATATCATTGCATAGACATGAGGGTGGAAGATTCTACCCTGGTACAGGAGCTGCA  
GATGAGGTTGGTTCTATGGGTGCAGAAGGATACTGTGTGAATATTCCTTGGAGCCGTG  
GGGGAGTGAGTGACAATGACTACATTTTTGCATTTGAGCAAGTCGTGCTTCCCATAGC  
TTTGATTTCATCCAGACTTTACTATCATTTTACGCAGGATTTGATGCTGCTAGGGGT  
GACCCCTTGGCTGCTGTGACGTAACCTCCTGCTGGTTATGCATCAATGACTCAGATGT  
TGAGTGCATTGTCAGGTGGAATAATTGCTTGTTATTTTGAAGGCGGCTACAATCTTCG  
CTCAATTTTCATCATCAGCTACAGCAGTGATTAAGGTCTTGCTTGGTGAAAGTCCAGTG  
ATTGACATAGACAAAGCTGTACCTTCCAAAGCTGGACTGCGAAGTGTTTTGGATGTTT  
TAAAGATTTCAGATGAACTTCTGGCCTACACTGGAGGCAAACCTTCACTAAATTGCATTC  
GCAGTGGGGATCCTATGCTTTTTCAGGACACAAGAGAACAGAGTAAAAAAGACGCA  
GGACTGGTTTACCAATATGGTGAGATTGGGACGAAAGAGGCTGTTGTATCGCGTAC  
TGTCGAAGCAGCTGCGTGCAAAGTCCTCTTGTAATTTTTCTTGTTGA

>SIRBZ9

ATGTCTCAGGTTGATAACAGAAATTCTTCTGCTGCCAAACGTGCCCCGAAGTATGGTG  
GCCGTAGGGAAGATGACTGGACTTGCCCTAGCTGTGGGAATGTCAACTTCTCCTTCAG  
AACTACGTGCAATATGCGCAACTGTACTCAGTCCAGGCCTGCAGATCACAACTCAAA  
ATCTGCAGTTAGGCCCATGCATGCTCCACAGAGCTATTCACCTCAGCTGCATATGTT  
GGGTCTGGTGCTCCCTCTTCAATGTATATGGGTGTAGCACCATATGGTGGTTCTTTGTT  
CAATGGACCATCCATGCCAGCCTATGACGTTCCCTTTGCTGGAGGTTCTGCTTATCAT  
TACAATTTTGGGAGCCGCTTTCTGGGGGGAGCCCGTACCGCCCGGTACATCTCTCCG  
CTCCACCTCCTTACACTGGTGGGATGGGAAATGGTGGGATGTATGGTGTGCCACCACT  
TATGGACCGATATGGTGTAGCATTGCCAATGGCCCCTGCTGCCATGGCACCGAGGCC  
AGGATTTTATCCTGATGATAATTCTCAAAAGAAAGATGGAACACGTGATAATGACTG  
GGCATGTCCCAAGTGTGGCAATGTCAACTTTTCGTTTAGAACAGTTTGTAACATGAGG  
AAGTGCAACACTCCAAAGCCTGGTTCTCAGGTTCCTCAAACCGGTGAAGAACAATAAA  
CCAGATACGCCAGATGGAAGCTGGAAATGTGAGAAGTGCAACAACATAAACTATCCT  
TTTCGGACCAAGTGTAACAGACAGAATTGTGGTGCGGAGAAACCATCTGAAGCCAAG  
AAGTCTCCTTCACAATCAGCTGATGAGAATGATCAGTGA

>SIRBZ10

ATGGAGTTCAGTTTCACGTGGGATGCTACCTCTTTTAGGCTGCATACAGTGACCGAATA  
TTACAGGCTGGATAGAAAAGCCCCTGTTACAGCAGCACTTGTTGCTGCTAATACAATTA  
TATACGTAAGGCCCACTTTTCTTCATTCTATACTTCCTACCATTAATCAGGTATGGTTTAA  
TCCCAGCTCATTCTTAAGCACAAGGACCTGAAACGATTCTTCCTGTCAGCACTCTACCA  
TTTGAATGGTTCTCACTTATTCTACAATATGCTCACTTCTGTGGAAGGGGATTCAATTGG  
AGACATCAATCGGAAGTGCAGAATTTGCATCGACAGTTGCAGGCCTTAGTTGCTATGTC  
CCAGGGCATCACACTATTGCCTGAGAAGTCACTTCTGCTGTTCTTTAACTATGAGAGGC  
CCTACTATCAGGAATATGCTGTGGGATTTTCTGGTGTTCTTTTTGCCATGAAAATTATTCT

CAATGCACAATCACATGATTATACATATGTTTCATGGGCTGTTGGTACCGACTCGTTATGC  
TGCCTGGGCAGAACTGATTCTCATACAAATGTTTCGTACCTGGTGTCTCATTCTTGGCC  
ACCTTGGTGCAATACTTGCCGGCCTTCTGTTTTTGTGTTTAAAAGCATCGTATTCAGGTG  
CGAATCCACTGAGGACAATCATCAGAGGTTTTGGGCATGCACTGAACTGGCCTTTAAT  
GTTTATGAACTGTTTATTCCGAAGGCAAATAATTGGTGGTAGAGGAACCGTTGGTGGGA  
GACAGACAAGAGATACATCTCAAATGTGGCGATGCCAAGGATGTACATTTGATAATTCA  
GGCTGGTTAAATGTTTGTGATATGTGCAGCACAAAGTCGTA CTGATGATGTGCTGTCGTC  
TCTTAGTTCAACGGATGAGGTTCAAGATCTATCATTGGATGAGTTGCGGCATCGGAGAA  
TTCAAAGATATGGTAGATGA

>SIRBZ11

ATGGGTTTCGCGTGAGAAGGACCAGCCAACACCGCACCTGAGCAGCCTCGTTGTACGG  
CCTACTGACAGCGGCGGAGAAAATGGAGGTGGCGGTGCAGGTAGCGATTACGAGCC  
AGGTGAGGTTTCGTCGGGATGCACCGCCGTATTCACGTTCCGATCGATTCTCTGATACC  
CATGGATATAGAGCGCATGCAGGTTCTGTTTCACCTGTGCGCCATAGGAATGCAGATC  
ATCGGTATAGTACTGATTTTGATCATTACAGGTGGCCCCGCCACGTAGTCATGGATTTGG  
TAGCGGTAGAGATCCTGGTAGACATCGAGACTATTCCCCCCTTATGGTCGCGGGAG  
ACATGCTGGCAGGTTTGTGTCGAGAAGTTATGATGGACCTGGTTATGGTGGACGGCA  
AGTTAGAGGAGAAGGTCTGCCTAGAAGCAATCCAAATGTACGGCCAAGAGATGGTG  
ATTGGATGTGCACGGATCCCTTGTGTAACA ACTTGA ACTTTGCAAGACGAGAGAACT  
GTAACAAGTGCAAAGGCCTCGATATGCACCTCCAGGAAGTCCTCGGAGGGGTTATC  
CCAGCCCACCTCCCCATCATCGCAATCCTGGCCCCCAATCAACCGTTCTCCAGGAAG  
GTTTGTGAATGGGTATAGGTCCCCTCCTCGCGGCTGGGCTAGAGATGACCCCCGAGAT  
TTCAGAGCTGGTGTTCTCATTCAAGATTTGAAGGGAGGTTTGCAGATCCTCCAATCC  
GTAGAGATAGGCCTGCTTTTGCTGATGCTGATGGTAGGGATCGAAGTAGGTTTGAGC  
GGCCTCCAGCCCTGGATTGGGGACATAGAGAGCGCGGGAGAGACAGCTATTTGAGTG  
AGAGAAAAGGTTATGAAAGGCGAACACCATCTCCACCTCATCCACCAGTACTACCAC  
CTCGTGGCCAATGGCCACGTGATACCAGGGAAAGAAGCCGTTCTCCAGTGAGAGGTG  
GACCACCGCCCAAAGACTATCGCCGTGATGTATACATGGGAAGGGGGCGAGATGATC  
GGAGGGTTGGACGAGGTGCATATTAG

>SIRBZ12

ATGGAGAGAGGAAGAGGACAGTGGGGATCAGTATTTTCGTGGTATGATTCCTCTGCTA  
GGGCTGCATACGCTGAGTGAGTATTCCAGATTAGACAGAAAACCCCCTATTACTGCT  
GCACTTCTTGCCGCTAATACCATTATTTACTTGAGGCCCAAATTTATTCATCCTTTCT  
TCCCACAATCGATCAAGTTTGGTTTAATCCTCACCTTATTCTCAAGTACACAGACCTC  
AAGCGATTCTTCCTGTGCGCGTTCTTCCACGTAAATGAATCTCACCTGGTGTACAATA  
TGCTTTCACTTTTGTGGAAGGGTATTCAACTGGAGACATCGATGGGTAGTGCAGAGTT  
TGCATCAATGGTTGCAACCTTAGTTGCTATGTCCCAAGGTGTTACACTGTTGCTTGCA  
AAATCACTTCTGCTGTTCTTTGATTACGAGAGACCCTACTATAATGAATACTCTGTGG  
GTTTTCTGGTGTCTCTTCGCCATGAAAGTTATCGTCAATTCACAATCAGATGAGTAT  
ACCTCTGTACATGGACTTATGGTTCCTACTCGTTATGCTGCCTGGGCAGAGCTTGTTCT  
CGTACAAATGTTTGTCCCTGGTGTCTCATTCTTGGCCACCTTGGGGGAATACTAGCT  
GGCCTTCTGTATTTGCAATTAAAAGCGTCATATTCAGGTCTGAATCCAGTTAGACAAT  
TCATGAGAGGTTTTAGCCATGCTCTGAGCTGGCCTTTAAGATTAGTGAAGAGCTTATT  
TCGACATCGACCTAGAATTACTGGGAGAGGA ACTGCTGGTGCGAGGATTGCACGAGA

TACACTTCATACGTGGAGATGTGATGCATGTACATTTGATAATTCAGGTAGGCTGAAC  
GTTTGTGAAATGTGTGGCACAGGTCGTACCGGTGATGCACCATCATCCCCTGGTTCAA  
CAAGTGAGATACATGATCTATCTTTGGAAGAATTAAGACGTAGGAGGATTCAACGAT  
TTGGTAGATAA

>SIRBZ13

ATGTTGAAGATGATATTCGCATCATCAAACAAAATTATTCAAACTCTTCCATTTCGA  
TTTCCATATCCATATCCAATTTCCATACCAAAAACTCAGCAATCCAGTTCGTTCTTGA  
AGAAGGTAAAACGCTTCAATCTCAACAAACCACTAAGCAGAACGAAGAAGTTGAGTT  
TAGCAGAAAACCTAATTCTGGAATTCAGACTCCTCAACTTTGGCCTGAATGGGTGAAC  
TTGATGGACAAGTTGTTAAAAATGGGATGTTTTGATGGATTTCGGAAACCCTTTTGGA  
ATGCTCAATGGGATGCAAACCTAATTAGAACTGCTTGTTTGAATTTTGCTCGACACCG  
ATTTGATCTCATAAGATATTTGTCCCCGCAAGATATTGAGGTGCTTGCAAGTTGTGGC  
TGTCGAAGCATGGATAGAAAAGTTGTCAACTCTGGAAAGCGTCTTAGACTATTGTTCCG  
GCATCGAGGAAGGAAATGTCTGCAGCTTCTGCATATTGAGGGGAAGTTGTGAGAGGG  
CTTATGCCGTACCACATAAAGATCAAGGTGGTTCGAACTGTTGATGTTATGCGTCTACT  
ATTGACTTATGGACTCAATCCAATTACTGGTGCTGTGGAGAATAAACCATCCTTGAAC  
AAAAGAGTTGAAGAATCAGCAAGAAAGCTGTTGAAAGAAATTGTGAATTTTCAGTTCT  
GAGGAACTCTTTTGTGAAACAAAGAAATCCACAAACCCTTGGAATCCATCTGTACAA  
CGTGATCATGAAGAAGGTCAGATCAATGCTCTCAGGAAACATGGTGATTGGGTTTGT  
CCCGAATGCAACTTCTTAAATTTTCTAGAAATGCTAAGTGCTTACGGTGCAATGGCT  
TGAATCACGAAAGACTTAACAAGTTAAGACAGGAGCAGGATCATCTTCCATTAAAGA  
AAGGCGACTGGATTTGCTCCAAATGCCATTTTATGAACTTCGCAAAGAATACAAGGT  
GCTTGCAAGTGACAGAAAAGCCACCTAAACGGCACCTTAATCCTGGAGAGTGGGAGT  
GTGAATCGTGCAACTACATCAATTTCAAAGAAACACAGTGTGCTTGAAATGTGATC  
ACAGACGACCAAAAGCATCTAGCTGTGCAGGTTCTTCCTGTGGATCTGCAAATCAAA  
GTAGAACCATTAGTCGAACACGGCCTTATTTTGGTGAAGTGAAGAAACAGATG  
AGGAATGGCAATTGATTGAGAGTGAGCGTGAAGATCGTTTGAGCTCAATGCCAGAGA  
ATGAGGTTGTTGATTTTCTGTTTTAGGGGGGAATAGTGAATTGTCTCGAGATGCAAA  
GAAGCAAGAAAGGTGGAAGACTGGAAATAAAAGAGAAAATGGTGATGAATTGAATA  
AGAAGTATTTTCAAATAGTGGCAATGAGGAAATGGATGAGTGGTTTGGGCATAAAA  
ATGTGTGA

>SIRBZ14

ATGAGCAGACCAGGAGACTGGAATTGTAGGTCATGCCAGCATTTGAACTTTCAAAGG  
AGAGATTCATGCCAAAGATGTGGTGAGCCAAGACATGGTGGAGCTCATGAATTCGGA  
AGTAATTGTTTTGGCGGAAGGGGAGGAGGAAGCTCCTCCCCTTTCGGATTTCAGTACC  
GGGCCTGATGTAAGGCCCGGTGACTGGTACTGCAATGTTGGAAATTGCGGTGCCCAT  
AACTTTGCAAGCCGCTCTAGCTGCTTCAAATGTGGTGCTTTTAAGGATGAATCCTCCG  
CTGGTGGTTGTGGTGGTGGTAGCAGCTTTGACTCTGACCACATGATGTCATCGCGCCC  
GAGAGGATTCGGGTTTCGGTGGTGCCAGTGGTGGCAGTCGCTCTGGATGGAAGTCTGG  
TGAAGTGGATTTGCACCAGGTTAGGGTGTAAATGAACACAACCTTTGCTAGTAGGATGGA  
GTGTTTCAGATGCAATGCACCTAGGGACTTAGCTGGTAACAAGTCTTCATATTAA

>SIRBZ15 transcript 1

ATGGATCCTGGTCGATATGGCCCCCATCAAGGATGGGAAAATAACAGCGTAATTGTG  
GTTCCCTTTCTTAATCACATAATGGATGATATACAAGAACTAGGGTCATGTGATTGTC

CAAAACTTTTTCCGGCATCTCTTAAAGAACAATGAATGAAAGCCATGGGAGAGTGAG  
GATGTGGAATGGTTTGCCTAAACTTCCATCCATGATTTTAACTTGCTGACACAACTTA  
TTCTCTTGAATCCACAGGCTTTGGAGGGTTATAGAGGAGTTCACGAGCCAGATTTCCG  
GGCTGGTGGTTCTTTTGATGATAGGAGGTTTCTAGACGATAGATTTTCAAGGGATGGT  
GTTTATCCCCGGGGTGCCTATCACCGTGATATACTGGATGGAGAGCACTACCCTCATC  
CACCAGCAGCAGTTGGACACTGGCCTCAGACAAGGAGGAGAAGTTATGAAGAAGTG  
TACCCTGTGGAGAGGGATTCCAGGAGGCATGAGAAGCCGTACGTTGATTCATATCAT  
GAAATTCGTGAAGCTGATAAGTATCATGAGATTAACACATCCAGAGATGGTTATCAC  
AGTTTTGACAACTACCCTGATGCTGGATTTAACAGGCCTGCTAGGTACGTGGGACGG  
GAGCATGACGACCCATATGATGATTATGACTACAAACATCGTATGGCTCACCCCAAC  
AGAGAGGATAGCCGTGAAAGAGACTATGAGTACAGTAGATATAGTTATGACTCAGAC  
TATGAACGTGGCAGTAGGAGAGATGATAACTGGAGACGACGTGAATCCCACGAGCGT  
GAACGTGACAAAGAATCAAGTCGTGAGAGGGATCCGAGTCCATATAGAAGGCATGA  
GCGTTCACGGTCACGTTCTCGTGGTCATGATGATCGGCTGAGGTCAAGATCTCCTCGA  
AGTCGAAGTCATAGTCGCAGCCACAGAGAGGACAGTTATGATGACGGCCGATACGAT  
AGAAGTGAGAGACGAAGAGATCGTGATGATAAAAGATACCATGACAATTATTCTGTG  
GCTCCTTCAGCGACTGTTGTTGTCAAAGGCCTTTCACAAAAAACTACTGAAGAAGATT  
TGTATCAAATCCTTGCTGAGTGGGGTCCCTTACGCCATGTTTCGTGTGATCAAAGAGCG  
AAATTCTGGCATTCTCTCGTGGATTTGCTTTTATTGATTTCCCTTCGGTGGATGCGGCCC  
AAGCAATGATGGACAAACTTGGGGATGAGGGTCTAGTTGTGGATGGTAGGAAGCTTT  
TTTTTGAGTACAGTAGCAAGCCAAGTGGAGGCCCGGTGGGCCCCGGTGGTCTAGACA  
ATGCTTCAAGATCTAACCATGGTCACCACCGAAGCATGACTGTTCCATCCGATTGGAT  
GTGTACCATCTGTGGATGTGTGAATTTTGCACGGCGGACATCTTGCTTTCAGTGTAAT  
GAGCCAAGAACAGATGATGCTCCTCCAGCAGACATGGCATCATCCAAGTCTAGCTCT  
CTAGGGAGGAGAGGTGAAGCAGGTCCCACACATGTCTTGGTTGTCCGTGGATTAGAT  
GAAAATGCAGACGAGGAGATGCTTCGTTATGAATTTTCCAAACATGCTCCTATTAAG  
GATCTTCGTCTTGTGAGAGACAAGTTCACCTCACGTGTCAAGGGGATTTGCTTTTGTGC  
ACTTCTATTTCGGTGGAGGAAGCTTCTAAAGCTCTTGAAGCAACAAATGGGACAACCTT  
AGAGAAGAATGGGCAGCTTCTTAGAGTTGCGTATGCAAAAAGTATCCTAGGACCAGG  
ATCTGGTACTTCTCAGGCTAGCAGTCTTGCTGCTGCTGCTATTGAAGCAGCAACTTTTT  
CTCAACAGTATGATGCTGTTGGATGGGCACCAAAAGAGTATAATCCTGATGATAAAC  
TGTCCACTGGTGGACAAGAACACAGTGGAGAAGTTGCTGGTCAAAATTCTGCTCCAC  
AATCAGGATTTGTCTGGGATGAAGCCTCTGGCTATTATTATGATGCGACTTCTGGTTT  
CTATTATGATGGAAATACAGGATTGTATTATGACGGTAACAATGGAATCTGGTATACT  
TATGATCAGAAAACCTCAGCAATATTTACCCTGCACGAATCAGAATGAAAACAAACCA  
GCAGCTGGACAAACTGAACTGCCAAGTCATCTGATGGCTCAAATACTAAGAAAGTC  
ATTATATCTGCACCAGCTTCCACAATTGCTGGTGAGAAGGCTGCCTCACTGCCGGATG  
CTATTACAGGCTGTGCCTCTGCAGCAATAGCTGCTGAAAAGAAAGAGAAGGAGAAGG  
CAAAAGAGATAAACTTGCATCAAAAAAGCAGCATCCTTGCAAATAAGAAGAAAAT  
GAGTAATGTATTGTCAATGTGGAAGCAAAGAAGTCACGAAGGTCAAGCCCCCGTGT  
GGCTCTTGAAGACAGCCAAACAGTGGGTGAAGACAGATCTAACTCAGTAGGTCCAGT  
TGTAAGACTAAGTTAAAAGCTGAGCCCTTGACAACTAGAGAGAATCCTACTGCCTG  
TTCAGGACTTGTAGGAAGCTCAAATTTTCAATCTGTGAGTTCCGAGACTCAGGATAGG  
CCTAGGTCTCTTACTAACAGCTCTGGGGGCACTCTGAAGGGCGTCATAAGAGGTTCTG

GTTTAGGAGTGGTGAAATCGGGTACTCTATATACAGGATCATCTGGAAGTGCATCCA  
CGTCACACACCATGCCACCAACCTCAGGTCCAACCTTCATTAATAAATGCAGATGCCTC  
TGCAGCACCCCTTTAGGACAGATGCATCGGCTTTGGGTTCTTATACACCCCCAGTACCA  
GCTGGTAGTAAAAGAAGGTTCTCAGAGATGCCATCACAGCCTCCTCCATCTATTAAG  
GAACAGTCTCAGTCTACAACTGCATACCGAGATCGTGCTGCTGAGCGGAGGAGCTTA  
TATGGTTCATCTTCAGCTTTTGGAGATGATGCATCAGAGCATGGAGATTCAAGTAAGA  
TTTTATAGAACATTTTGAGCAAAAGCCACTTGTTTTGAAATCTTCTCAGCTTTGTATCT  
CTCCTCTCTTCCTCTCTTCTCCTGGTTTCAAATGCATTATGGGTTTCGTAAGTGTGTAT  
CTTTGTTGCTATCATAGGATGTAATTCCGTAGTCGAAAACCTTTCCGTAGACCAAGAC  
CTTGCTTAGTTGGATAACTTCAAAAATTGAAGATTCCAACGGTGGTTGCTAAATTTGT  
TTGGATTTGTATTAACCTTGTTAGAAAATTTGTTTTCTATTATTGCTTGGGCTTCAAGAT  
CGGGACTCAACATTCAGAAGAGGTGTTTTTGATCCAACCTCCTTTCCCCCTGGTGTTG  
GAGGTGGACGTAGTGCAGAGGGCAATAGTCAGAGCTTTGAGGTTATCACGGCTGACA  
GGGCTATAGACGAGAGTAACGTGGGCAATCGTATGCTTCGCAACATGGGATGGCAGG  
AGGGCTTGGGATTGGGGAAGGACGGAAGTGGTATGGTGGAGCCAGTCCAAGCTCAA  
AGCACTGGACATAGAGCCGGACTGGGAAGTCAGCAGTCCAAGAAGGTGGACCCAAA  
CCTTGAAGCACAGTCAGGTGACAGTTACAAGACTCTCATTCAAAAAAAGGCTATTGC  
TAGGTTTCAGAGAGATGTCATAA

>SIRBZ15 transcript 2

ATGGATCCTGGTCGATATGGCCCCCATCAAGGATGGGAAAATAACAGCGTAATTGTG  
GTTCTTTTCTTAATCACATAATGGATGATATACAAGAACTAGGGTCATGTGATTGTC  
CAAAACCTTTTCCGGCATCTCTTAAAGAACAATGAATGAAAGCCATGGGAGAGTGAG  
GATGTGGAATGGTTTGCCTAACTTCCATCCATGATTTTAACTTGCTGACACAACTTA  
TTCTCTTGAATCCACAGGCTTTGGAGGGTTATAGAGGAGTTCACGAGCCAGATTTCCG  
GGCTGGTGGTTCTTTTGATGATAGGAGGTTTCTAGACGATAGATTTTCAAGGGATGGT  
GTTTATCCCCGGGGTGCTATCACCGTGATATACTGGATGGAGAGCACTACCCTCATC  
CACCAGCAGCAGTTGGACACTGGCCTCAGACAAGGAGGAGAAGTTATGAAGAAGTG  
TACCCTGTGGAGAGGGATTCCAGGAGGCATGAGAAGCCGCCTGCTAGGTACGTGGGA  
CGGGAGCATGACGACCCATATGATGATTATGACTACAAACATCGTATGGCTCACCCC  
AACAGAGAGGATAGCCGTGAAAGAGACTATGAGTACAGTAGATATAGTTATGACTCA  
GACTATGAACGTGGCAGTAGGAGAGATGATAACTGGAGACGACGTGAATCCCACGA  
GCGTGAACGTGACAAAGAATCAAGTCGTGAGAGGGATCCGAGTCCATATAGAAGGC  
ATGAGCGTTACGGTCACGTTCTCGTGGTCATGATGATCGGCTGAGGTCAAGATCTCC  
TCGAAGTCGAAGTCATAGTCGCAGCCACAGAGAGGACAGTTATGATGACGGCCGATA  
CGATAGAAGTGAGAGACGAAGAGATCGTGATGATAAAAGATACCATGACAATTATTC  
TGTGGCTCCTTCAGCGACTGTTGTTGTCAAAGGCCTTTCACAAAAAACTACTGAAGAA  
GATTTGTATCAAATCCTTGCTGAGTGGGGTCCCTTACGCCATGTTCTGTGTGATCAAAG  
AGCGAAATTCTGGCATTCTCTCGTGGATTGCTTTTATTGATTTCCCTTCGGTGGATGCG  
GCCAAGCAATGATGGACAACTTGGGGATGAGGGTCTAGTTGTGGATGGTAGGAAG  
CTTTTTTTTGGAGTACAGTAGCAAGCCAACCTGGAGGCCCCGGTGGGCCCGGTGGTCTAG  
ACAATGCTTCAAGATCTAACCATGGTCACCACCGAAGCATGACTGTTCCATCCGATTG  
GATGTGTACCATCTGTGGATGTGTGAATTTTGCACGGCGGACATCTTGCTTTCAGTGT  
AATGAGCCAAGAACAGATGATGCTCCTCCAGCAGACATGGCATCATCCAACCTCTAGC  
TCTCTAGGGAGGAGAGGTGAAGCAGGTCCCACACATGTCTTGTTGTCCGTGGATTA

GATGAAAATGCAGACGAGGAGATGCTTCGTTATGAATTTTCCAAACATGCTCCTATTA  
AGGATCTTCGTCTTGTCTAGAGACAAGTTCACTCACGTGTCAAGGGGATTTGCTTTTGT  
GCACTTCTATTCGGTGGAGGAAGCTTCTAAAGCTCTTGAAGCAACAAATGGGACAAC  
TTTAGAGAAGAATGGGCAGCTTCTTAGAGTTGCGTATGCAAAAAGTATCCTAGGACC  
AGGATCTGGTACTTCTCAGGCTAGCAGTCTTGCTGCTGCTGCTATTGAAGCAGCAACT  
TTTTCTCAACAGTATGATGCTGTTGGATGGGCACCAAAAAGAGTATAATCCTGATGATA  
AACTGTCCACTGGTGGACAAGAACACAGTGGAGAAGTTGCTGGTCAAAAATTCTGCTC  
CACAATCAGGATTTGTCTGGGATGAAGCCTCTGGCTATTATTATGATGCGACTTCTGG  
TTTCTATTATGATGGAAATACAGGATTGTATTATGACGGTAACAATGGAATCTGGTAT  
ACTTATGATCAGAAAACCTCAGCAATATTTACCCCTGCACGAATCAGAATGAAAACAAA  
CCAGCAGCTGGACAAACTGAAACTGCCAAGTCATCTGATGGCTCAAATACTAAGAAA  
GTCATTATATCTGCACCAGCTTCCACAATTGCTGGTGAGAAGGCTGCCTCACTGCCGG  
ATGCTATTCAGGCTGCTGCCTCTGCAGCAATAGCTGCTGAAAAGAAAGAGAAGGAGA  
AGGCAAAAGAGATAAAACTTGCATCAAAAAGCAGCATCCTTGCAAATAAGAAGAAA  
ATGAGTAATGTATTGTCAATGTGGAAGCAAAGAAGTCACGAAGGTCAAGCCCCCGT  
GTGGCTCTTGAAGACAGCCAAACAGTGGGTGAAGACAGATCTAACTCAGTAGGTCCA  
GTTGTAAAGACTAAGTTAAAAGCTGAGCCCTTGACAACCTAGAGAGAATCCTACTGCC  
TGTTACAGGACTTGTAGGAAGCTCAAATTTTCAATCTGTGAGTTCCGAGACTCAGGATA  
GGCCTAGGTCTCTTACTAACAGCTCTGGGGGCACTCTGAAGGGCGTCATAAGAGGTT  
CTGGTTTAGGAGTGGTGAAATCGGGTACTCTATATACAGGATCATCTGGAAGTGCATC  
CACGTCACACACCATGCCACCAACCTCAGGTCCAACCTTCATTAATAAATGCAGATGCC  
TCTGCAGCACCCCTTTAGGACAGATGCATCGGCTTTGGGTTCTTATACACCCCCAGTAC  
CAGCTGGTAGTAAAAGAAGGTTCTCAGAGATGCCATCACAGCCTCCTCCATCTATTAA  
GGAACAGTCTCAGTCTACAACCTGCATACCGAGATCGTGCTGCTGAGCGGAGGAGCTT  
ATATGGTTCATCTTCAGCTTTTGGAGATGATGCATCAGAGCATGGAGATTCAAGTAAG  
ATTTTATAGAACATTTTGAGCAAAAGCCACTTGTTTTGAAATCTTCTCAGCTTTGTATC  
TCTCCTCTCTTCTCTCTTCTCCTGGTTTTCAAATGCATTATGGGTTTCGTAAGTGTGTAT  
CTTTGTTGCTATCATAGGATGTAATCCGTTAGTCGAAAACCTTTCCGTAGACCAAGAC  
CTTGCTTAGTTGGATAACTTCAAAAATTGAAGATTCCAACGGTGGTTGCTAAATTTGT  
TTGGATTTGTATTAACTTGTTAGAAAATTTGTTTTCTATTATTGCTTGGGCTTCAAGAT  
CGGGACTCAACATTCAGAAGAGGTGTTTTTGATCCAACCTCTTTCCCCCTGGTGTTG  
GAGGTGGACGTAGTGCAGAGGCGAATAGTCAGAGCTTTGAGGTTATCACGGCTGACA  
GGGCTATAGACGAGAGTAACGTGGGCAATCGTATGCTTCGCAACATGGGATGGCAGG  
AGGGCTTGGGATTGGGGAAGGACGGAAGTGGTATGGTGGAGCCAGTCCAAGCTCAA  
AGCACTGGACATAGAGCCGGACTGGGAAGTCAGCAGTCCAAGAAGGTGGACCCAAA  
CCTTGAAGCACAGTCAGGTGACAGTTACAAGACTCTCATTCAAAAAAAGGCTATTGC  
TAGGTTTCAGAGAGATGTCATAA

>SIRBZ15 transcript 3

ATGGATCCTGGTCGATATGGCCCCCATCAAGGATGGGAAAATAACAGCGTAATTGTG  
GTTCTTTCTTAATCACATAATGGATGATATACAAGAACTAGGGTCATGTGATTGTC  
CAAAACTTTTTCCGGCATCTCTTAAAGAACAATGAATGAAAGCCATGGGAGAGTGAG  
GATGTGGAATGGTTTGCCTAACTTCCATCCATGATTTTAACTTGCTGACACAACTTA  
TTCTCTTGAATCCACAGGCTTTGGAGGGTTATAGAGGAGTTACGAGCCAGATTTCCG  
GGCTGGTGGTTCTTTTGATGATAGGAGGTTTCTAGACGATAGATTTTCAAGGGATGGT

GTTTATCCCCGGGGTGCCTATCACCGTGATATACTGGATGGAGAGCACTACCCTCATC  
CACCAGCAGCAGTTGGACACTGGCCTCAGACAAGGAGGAGAAGTTATGAAGAAGTG  
TACCCTGTGGAGAGGGATTCCAGGAGGCATGAGAAGCCGTACGTTGATTTCATATCAT  
GAAATTCGTGAAGCTGATAAGTATCATGAGATTAACACATCCAGAGATGGTTATCAC  
AGTTTTGACAACACTACCCTGATGCTGGATTAAACAGGCCTGCTAGGTACGTGGGACGG  
GAGCATGACGACCCATATGATGATTATGACTACAAACATCGTATGGCTCACCCCAAC  
AGAGAGGATAGCCGTGAAAGAGACTATGAGTACAGTAGATATAGTTATGACTCAGAC  
TATGAACGTGGCAGTAGGAGAGATGATAACTGGAGACGACGTGAATCCACGAGCGT  
GAACGTGACAAAGAATCAAGTCGTGAGAGGGATCCGAGTCCATATAGAAGGCATGA  
GCGTTCACGGTCACGTTCTCGTGGTCATGATGATCGGCTGAGGTCAAGATCTCCTCGA  
AGTCGAAGTCATAGTCGCAGCCACAGAGAGGACAGTTATGATGACGGCCGATACGAT  
AGAAGTGAGAGACGAAGAGATCGTGATGATAAAAGATACCATGACAATTATTCTGTG  
GCTCCTTCAGCGACTGTTGTTGTCAAAGGCCTTTCACAAAAAACTACTGAAGAAGATT  
TGTATCAAATCCTTGCTGAGTGGGGTCCCTTACGCCATGTTTCGTGTGATCAAAGAGCG  
AAATTCTGGCATTCTCGTGGATTTGCTTTTATTGATTTCCCTTCGGTGGATGCGGCCC  
AAGCAATGATGGACAAACTTGGGGATGAGGGTCTAGTTGTGGATGGTAGGAAGCTTT  
TTTTTGAGTACAGTAGCAAGCCAACCTGGAGGCCCCGGTGGGCCCCGGTGGTCTAGACA  
ATGCTTCAAGATCTAACCATGGTCACCACCGAAGCATGACTGTTCCATCCGATTGGAT  
GTGTACCATCTGTGGATGTGTGAATTTTGCACGGCGGACATCTTGCTTTCAGTGTAAT  
GAGCCAAGAACAGATGATGCTCCTCCAGCAGACATGGCATCATCCAACCTCTAGCTCT  
CTAGGGAGGAGAGGTGAAGCAGGTCCCACACATGTCTTGGTTGTCCGTGGATTAGAT  
GAAAATGCAGACGAGGAGATGCTTCGTTATGAATTTTCCAAACATGCTCCTATTAAG  
GATCTTCGTCTTGTGTCAGAGACAAGTTCACTCACGTGTCAAGGGGATTTGCTTTTGTGC  
ACTTCTATTTCGGTGGAGGAAGCTTCTAAAGCTCTTGAAGCAACAAATGGGACAACCTT  
AGAGAAGAATGGGCAGCTTCTTAGAGTTGCGTATGCAAAAAGTATCCTAGGACCAGG  
ATCTGGTACTTCTCAGGCTAGCAGTCTTGCTGCTGCTGCTATTGAAGCAGCAACTTTTT  
CTCAACAGTATGATGCTGTTGGATGGGCACCAAAAGAGTATAATCCTGATGATAAAC  
TGTCCTACTGGTGGACAAGAACACAGTGGAGAAGTTGCTGGTCAAAATTCTGCTCCAC  
AATCAGGATTTGTCTGGGATGAAGCCTCTGGCTATTATTATGATGCGACTTCTGGTTT  
CTATTATGATGGAAATACAGGATTGTATTATGACGGTAACAATGGAATCTGGTATACT  
TATGATCAGAAAACCTCAGCAATATTTACCCTGCACGAATCAGAATGAAAACAAACCA  
GCAGCTGGACAAACTGAACTGCCAAGTCATCTGATGGCTCAAATACTAAGAAAGTC  
ATTATATCTGCACCAGCTTCCACAATTGCTGGTGAGAAGGCTGCCTCACTGCCGGATG  
CTATTCAGGCTGCTGCCTCTGCAGCAATAGCTGCTGAAAAGAAAGAGAAGGAGAAGG  
CAAAAGAGATAAACTTGCATCAAAAAGCAGCATCCTTGCAAATAAGAAGAAAATG  
AGTAATGTATTGTCAATGTGGAAGCAAAGAAGTCACGAAGGTCAAGCCCCCGTGTG  
GCTCTTGAAGACAGCCAAACAGTGGGTGAAGACAGATCTAACTCAGTAGGTCCAGTT  
GTAAAGACTAAGTTAAAAGCTGAGCCCTTGACAACCTAGAGAGAATCCTACTGCCTGT  
TCAGGACTTGTAGGAAGCTCAAATTTTCAATCTGTGAGTTCCGAGACTCAGGATAGGC  
CTAGGTCTCTTACTAACAGCTCTGGGGGCACTCTGAAGGGCGTCATAAGAGGTTCTGG  
TTTAGGAGTGGTGAAATCGGGTACTCTATATACAGGATCATCTGGAAGTGCATCCAC  
GTCACACACCATGCCACCAACCTCAGGTCCAACCTCATTAAATAAATGCAGATGCCTCT  
GCAGCACCTTTAGGACAGATGCATCGGCTTTGGGTCTTATACACCCCCCAGTACCA  
GCTGGTAGTAAAAGAAGGTTCTCAGAGATGCCATCACAGCCTCCTCCATCTATTAAG

GAACAGTCTCAGTCTACAACCTGCATACCGAGATCGTGCTGCTGAGCGGAGGAGCTTA  
TATGGTTCATCTTCAGCTTTTGGAGATGATGCATCAGAGCATGGAGATTCAAATCGGG  
ACTCAACATTGAGAAGAGGTGTTTTTGATCCAACCTCCTTTCCCCCTGGTGTGGAGG  
TGGACGTAGTGCAGAGGCGAATAGTCAGAGCTTTGAGGTTATCACGGCTGACAGGGC  
TATAGACGAGAGTAACGTGGGCAATCGTATGCTTCGCAACATGGGATGGCAGGAGGG  
CTTGGGATTGGGGAAGGACGGAAGTGGTATGGTGGAGCCAGTCCAAGCTCAAAGCAC  
TGGACATAGAGCCGGACTGGGAAGTCAGCAGTCCAAGAAGGTGGACCCAAACCTTG  
AAGCACAGTCAGGTGACAGTTACAAGACTCTCATTCAAAAAAAGGCTATTGCTAGGT  
TCAGAGAGATGTCATAA

>SlRBZ15 transcript 4

ATGGATCCTGGTCGATATGGCCCCCATCAAGGATGGGAAAATAACAGCGTAATTGTG  
GTTCTTTCTTAATCACATAATGGATGATATACAAGAACTAGGGTCATGTGATTGTC  
CAAACTTTTTCCGGCATCTCTTAAAGAACAATGAATGAAAGCCATGGGAGAGTGAG  
GATGTGGAATGGTTTGCCTAACTTCCATCCATGATTTTAACTTGCTGACACAACTTA  
TTCTCTTGAATCCACAGGCTTTGGAGGGTTATAGAGGAGTTCACGAGCCAGATTTCCG  
GGCTGGTGGTTCTTTTGATGATAGGAGGTTTCTAGACGATAGATTTTCAAGGGATGGT  
GTTTATCCCCGGGGTGCCTATCACCGTGATATACTGGATGGAGAGCACTACCCTCATC  
CACCAGCAGCAGTTGGACACTGGCCTCAGACAAGGAGGAGAAGTTATGAAGAAGTG  
TACCCTGTGGAGAGGGATTCCAGGAGGCATGAGAAGCCGCCTGCTAGGTACGTGGGA  
CGGGAGCATGACGACCCATATGATGATTATGACTACAAACATCGTATGGCTCACCCC  
AACAGAGAGGATAGCCGTGAAAGAGACTATGAGTACAGTAGATATAGTTATGACTCA  
GACTATGAACGTGGCAGTAGGAGAGATGATAACTGGAGACGACGTGAATCCCACGA  
GCGTGAACGTGACAAAGAATCAAGTCGTGAGAGGGATCCGAGTCCATATAGAAGGC  
ATGAGCGTTCACGGTCACGTTCTCGTGGTCATGATGATCGGCTGAGGTCAAGATCTCC  
TCGAAGTCGAAGTCATAGTCGCAGCCACAGAGAGGACAGTTATGATGACGGCCGATA  
CGATAGAAGTGAGAGACGAAGAGATCGTGATGATAAAAGATACCATGACAATTATTC  
TGTGGCTCCTTCAGCGACTGTTGTTGTCAAAGGCCTTTCACAAAAAACTACTGAAGAA  
GATTTGTATCAAATCCTTGCTGAGTGGGGTCCCTTACGCCATGTTCTGTGTATCAAAG  
AGCGAAATTCTGGCATTCTCGTGGATTTGCTTTTATTGATTTCCCTTCGGTGGATGCG  
GCCCAAGCAATGATGGACAACTTGGGGATGAGGGTCTAGTTGTGGATGGTAGGAAG  
CTTTTTTTTGGAGTACAGTAGCAAGCCAACCTGGAGGCCCCGGTGGGCCCCGGTGGTCTAG  
ACAATGCTTCAAGATCTAACCATGGTCACCACCGAAGCATGACTGTTCCATCCGATTG  
GATGTGTACCATCTGTGGATGTGTGAATTTTGCACGGCGGACATCTTGCTTTCAGTGT  
AATGAGCCAAGAACAGATGATGCTCCTCCAGCAGACATGGCATCATCCAACCTCTAGC  
TCTCTAGGGAGGAGAGGTGAAGCAGGTCCCACACATGTCTTGTTGTCCGTGGATTA  
GATGAAAATGCAGACGAGGAGATGCTTCGTTATGAATTTTCCAAACATGCTCCTATTA  
AGGATCTTCGTCTTGTCAGAGACAAGTTCACCTCACGTGTCAAGGGGATTTGCTTTTGT  
GCACTTCTATTCCGGTGGAGGAAGCTTCTAAAGCTCTTGAAGCAACAAATGGGACAAC  
TTTAGAGAAGAATGGGCAGCTTCTTAGAGTTGCGTATGCAAAAAGTATCCTAGGACC  
AGGATCTGGTACTTCTCAGGCTAGCAGTCTTGCTGCTGCTGCTATTGAAGCAGCAACT  
TTTTCTCAACAGTATGATGCTGTTGGATGGGCACCAAAAGAGTATAATCCTGATGATA  
AACTGTCCACTGGTGGACAAGAACACAGTGGAGAAGTTGCTGGTCAAAATTCTGCTC  
CACAATCAGGATTTGTCTGGGATGAAGCCTCTGGCTATTATTATGATGCGACTTCTGG  
TTTCTATTATGATGGAAATACAGGATTGTATTATGACGGTAACAATGGAATCTGGTAT

ACTTATGATCAGAAAACCTCAGCAATATTTACCTGACGAATCAGAATGAAAACAAA  
CCAGCAGCTGGACAAACTGAACTGCCAAGTCATCTGATGGCTCAAATACTAAGAAA  
GTCATTATATCTGCACCAGCTTCCACAATTGCTGGTGAGAAGGCTGCCTCACTGCCGG  
ATGCTATTCAGGCTGCTGCCTCTGCAGCAATAGCTGCTGAAAAGAAAGAGAAGGAGA  
AGGCAAAAGAGATAAAACTTGCATCAAAAAGCAGCATCCTTGCAAATAAGAAGAAA  
ATGAGTAATGTATTGTCAATGTGGAAGCAAAGAAGTCACGAAGGTCAAGCCCCCGT  
GTGGCTCTTGAAGACAGCCAAACAGTGGGTGAAGACAGATCTAACTCAGTAGGTCCA  
GTTGTAAAGACTAAGTTAAAAGCTGAGCCCTTGACAAGTAGAGAGAATCCTACTGCC  
TGTTCAAGGACTTGTAGGAAGCTCAAATTTTCAATCTGTGAGTTCCGAGACTCAGGATA  
GGCCTAGGTCTCTTACTAACAGCTCTGGGGGCACTCTGAAGGGCGTCATAAGAGGTT  
CTGGTTTAGGAGTGGTGAAATCGGGTACTCTATATACAGGATCATCTGGAAGTGCATC  
CACGTCACACACCATGCCACCAACCTCAGGTCCAACTTCATTAATAAATGCAGATGCC  
TCTGCAGCACCCCTTTAGGACAGATGCATCGGCTTTGGGTTCTTATACACCCCCAGTAC  
CAGCTGGTAGTAAAAGAAGGTTCTCAGAGATGCCATCACAGCCTCCTCCATCTATTAA  
GGAACAGTCTCAGTCTACAAGTGCATACCGAGATCGTGCTGCTGAGCGGAGGAGCTT  
ATATGGTTCATCTTCAGCTTTTGGAGATGATGCATCAGAGCATGGAGATTCAAATCGG  
GACTCAACATTCAGAAGAGGTGTTTTTATCCAAGTCTTTCCCCCTGGTGTTGGAG  
GTGGACGTAGTGCAGAGGCGAATAGTCAGAGCTTTGAGGTTATCACGGCTGACAGGG  
CTATAGACGAGAGTAACGTGGGCAATCGTATGCTTCGCAACATGGGATGGCAGGAGG  
GCTTGGGATTGGGGAAGGACGGAAGTGGTATGGTGGAGCCAGTCCAAGCTCAAAGC  
ACTGGACATAGAGCCGGACTGGGAAGTCAGCAGTCCAAGAAGGTGGACCCAAACCTT  
GAAGCACAGTCAGGTGACAGTTACAAGACTCTCATTCAAAAAAAGGCTATTGCTAGG  
TTCAGAGAGATGTCATAA

>SIRBZ16

ATGGCATCGGAGGATGAATTGATGATGCAGGATGCTACCGACGACGGCGAGTCCTTC  
GATGATGATTTCTACAGCGGCGGCGATGTTTCATGATGATTCCGATGATGATGACGTCA  
TGGATTACGATTTTCATCGATAACGACTCCGATGATTCTGATACGGTCATCGCACATCA  
TCGCTCTCAGTCAAAGTATAGCATCTTGAATGAAGCTGATATTCACAAATGCCAAGAG  
GAAAGTATTACAAAGATATCTACAGTGCTCTCTATTCCAAGGGTAGCTGCTGGCATCC  
TGCTTCGCCATTATAACTGGAGTGTGAGCAAAGTGAATGATGAATGGTTTGCAGATGA  
AGGAAAGGTCCGCGAGGATTGTTGGTTTGTAGAGAATCATGTGCCACTCCCTGATGG  
GGAAGAGCTTACTTGTGGGATCTGCTTTGACGTTTATCCTCGTAAGGAAATCAGTGCG  
GCTGCTTGTGGTCATCCTTTTTGTTTACATGCTGGCAAGGGTATATTAGCACGTCCAT  
CACTGATGGTCCCTGGATGCTTGATGTTGCGCTGTCCTGATCCATCTTGATGTGCTGCTA  
TCGGTCTAGATATGATAAACAAATTGGCCTCTGATGATGACAAAAGAAGTATAATA  
GGTACTTTATCAGGTCGTTTCGTGGAGGACAACAGAAAGACAAAATGGTGTCCTGCTC  
CAGGGTGTGATTATGCAGTTGACTATATTGTTGGTAGTGGAAGCTATGATGTTACTTG  
TGGGTGCTCATATAGTTTCTGCTGGAATTGTACCGAGGAACTCATCGCCCAGTTGAT  
TGTGGAAGTGTGTCTAAGTGGATTTTGAAGAACAGTGCAGAGTCTGAGAACATGAAC  
TGGATATTAGCTAATTCTAAGCCTTGTCCGAAATGCAAGCGGCCAATTGAGAAAAAT  
CAGGGGTGCATGCATATCACATGCACACCACCCTGTAAATTTGAGTTTTGCTGGCTCT  
GCCTTGGCCCTTGGACGGATCACGGTGAGAGAACTGGTGGCTTTTATGCGTGCAACC  
GTTACGAGTCCGCAAAGCAAGATGGAGTGTTTGATGAATCTGAAAAGAGGAGAGAG  
ATGGCCAAAAATTCTTTAGAAAGATATACACATTACTATGAGCGATGGGCCACCAAC

CAGTCGTCACGGCAAAAGGCACTTTCAGATCTTCAGCAAATGCAAACAGTACATCTT  
GAGAAACTGAGTGACAAACAGTGTCAACCCGAATCACAGCTCAAATTTATTATAGAG  
GCCTGGTTGCAGATAGTTGAGTGTAGGCGTGTGCTAAAATGGACTTATGCATATGGTT  
ATTACTTACCCGAGCATGAACATGCCAAAAGGCAGTTCTTTGAGTATTTACAAGGTGA  
GGCTGAGTCTGGACTTGAACGGCTTCATCAGTGCGCGGAGAAAGAACTCCAGGGGTA  
TCTTGATGCAGAAGGTCCATCAAGAGAATTTAATGAGTTCCGAACAAAGCTTGCAGG  
GCTTACAAGTGTAACCTCGAACTACTTTGAGAACCTGGTTCGAGCTTTAGAGAATGGT  
CTCTCGGATGTGGATGGTCATGGTGCTTACAGCAGGGCAGCTAGCTCGAAAAGCTTG  
GGAGGTGGGAGCATCAAAGGGAAGGGCGGTAGAGGAAAGGGAGCCACATCAAGATC  
AAGCAGTTCCAGAAACATAGATGATTCAGGACACTGGTCTTGTGAGTATTGTACATAT  
GCCAATGTTAGGTCTGCTACCGCGTGCCAGATGTGCCAGCAGCGTCGTTGA

>SIRBZ17

ATGGCAAGCTATTCAGGGAAAGGATCTACATTAAATGGTTCTGTGTATGTCTGTAAC  
TGCCCCCTTGGTACAGATGAAGATATGCTAGCTGAATATTTTGGCACAATAGGGGTGCT  
AAAGAAAGACAAACGAAGCGGTAGGCCCAAGATATGGTTATACCGTGATAAAGTTA  
CTAATGAGCCCAAAGGCGATGCCACAGTCACATATGAAGACCCTCATGCTGCATTAG  
CTGCTGTTGAATGGTTCAATAACAAGGATTTTCATGGGTCAATGATTGGGGTATTTAT  
TGCAGAGTCTAAGAACAAAGACGAGGCTTCCTATGTTTCAGTGAATCAAATTAGTGA  
GCCCAATCTGAACAGTGGTCTGGCTGTGCTGGATGAAGGCTCCAACGATATAGATGG  
AGGTGGCGGAAGAGGTAGGGGCAGGGGAGATGCTTCTGCAAAGGCATGGCAACAAG  
ATGGTGACTGGCTGTGTCCAAATACAAGTTGCACTAATGTGAACTTTGCATTTCTGTG  
AGTTTGCAACCGCTGTGGAAGTCTCGGCCTGCTGGTGCTGGTGGCGGTGGGGCTGG  
AGCTGCTGGTCGCGGGAGAGGACGTGGTAGCCAGGACCCAGGCGCTCCTGGTCGTGC  
AGTTGGTGGTCCTCCAGGCCTCTTTGGTCCAAATGATTGGGCTTGTCGATGTGTGCC  
AACATTAAGTGGGCTAAGAGGAACAAGTGTAACATATGCAACACCAACAAGCCTGGG  
CACAATGAGGGTGGTGTGAGAGGAGGACGTGCTGGAGGTTATAAAGAACTCGATGA  
AGAAGAAATAGAGGAACTAGACGTCGGAGGAGAGAGGCTGAAGAAGATGATGGTG  
AAATGTATGACGAGTTTGAAATCTGAAGAAGAAGTTTCGTGCTAAAACACAGCGAG  
CAGAAGCAGCCCAGAGCCTCCCCCTGGAGTAGGACGCGCTGGATGGGAAGCTGAG  
GAATTAGGGGTGGCGGAGCGAGATAGAAAGGAAAGAAGCAGAGAAAGATCAAGAG  
ATTATGATGATAGGGAGAGAGCTAGGCATCGAAGCAGAAGTCGGGAAAGGGATAGG  
GGAAGAGATAGAGACCGCTCCTACGACTATGATCGAGACAGAGAATATGGTCGTGAC  
CGCGACCGTGAGCGGAACAAGTATCGTCATTGA

>SIRBZ18

ATGTGTGCTGCATGCCAACACCTAAATTTCAAGAAACGGGATGCATGTCAACGATGCA  
GCTGCCCCAAATATGCATCACCAGCTGATGTTGCCATGTATGGACTAAACAAAAGTAA  
GTCTTGGCTGGAGACTGGTATTGCAGTGGTATGAACTGTGGTTCTCATAACTACGCAAG  
CAGAACAAGCTGCTATCGATGTGGTGCCTTAAAAAGTGATTATTATGGCATCGGAGTAG  
GAATGATGGCACCGACAGGTTATGGATATGATTCAAGTGCTCTTCCTGGTTGGAAGAGT  
GGTGATTGGATTTGCAGCAGATTAGGATGTGGTATGCACAACTACGCCAGTAGAGCAG  
AATGTTATAAGTGCAAGACACCTAGGGATTTTCGGAGGTGATATGAGAGAAAGTGAATT  
GTATTGA

>SIRBZ19

ATGAGTAGGGAAGGAGATTGGATGTGTTCTGCATGCCAACACCTAAATTTCAAGAAA  
CGAGATGCATGTCAACGATGTAGCTGTCCTAAATACGCAACATCGGCTGATGTTGCTA  
TGTATGGACTAAGCAAAACAGATGTTCTTGCTGGAGATTGGTATTGCAGTGCCATGAA  
TTGTGGTTCTCACAACATATGCAAGCAGAACAAGTTGTTATCGATGCGGTTTCATCAAAA  
AGTGATTATTATGGTATGGGGGTAGGAATGATGGCACCAGCAGGTTATGGATATGAT  
GCAAGTGCTATTCCTGGTTGGAAGAGTGGTGATTGGATTTGCAGCAGGTTAGTTGTCT  
TTAACTTCGACTTTATGAATCCTCATTATTCATGTCCTTCCGTTTAAGTCCAAATCTTT  
ACGTGACTTGTTCCCTTCTTGATCGACAGATTAGGATGTGGTATGCACAACATATGCCAG  
TAGAGCTGAATGTTATAAATGCAAGACACCTAGAGATTTTGGTGAGCCATCTGCCAT  
ATGA

>SIRBZ20

ATGAGCATGGAAGGAGATTGGATGTGTGCTGCATGCCAACACTTAAATTTCAAGAAA  
CGGGATGCCTGCCAACGATGTAGCTGTCCTAAATATGCAACAACAACCGATGTTTAC  
ATGTATGGACTAAACAAAACAGAAGTCCTAGCTGGAGACTGGTATTGCAGTGCCATG  
AACTGCGGTACACACAACACTACGCAAGCAGAACAAGCTGTTATAGATGTGGTGCCTTA  
AAAAATAATTATTATGGCATCGGGACGGGAATGACAGCATCAACAGGTTATGGATAT  
GATGCAAGTGCTTGTCTGTTGGAAGAGTGGTGATTGGATTTGCAGCAGATTAGGAT  
GTGGTATGCACAACATATGCCAGTAGAGCAGAATGTTATAAATGCAAGATGCCTAGGG  
ATTTTGATCAGTTTCTCAAGGAAGGGTTAATTTCTAAGTTTGTAAGTGTGCAAGTTCTA  
ATGAATGAAAATCCCTTCAGATTTTGCATTCCCTATGTTTTCAAGTTTCAACAACCTGCT  
TCTGTCAGGGCAGTCCGATGAGTATTATTGGTTTGGGCTTGGGACTTCCATGTTGGAG  
GTCTCAAGTTCGAAACCCCTTGCCAGCGAAAGCAAAGGGTTTGCCTTCTGGGTCAAG  
CTCGTCGCACCGGACTTGCCTAGTTTGGGTACCTCTCCTATGTGGTTTACGAGCTATT  
GAATAGGAGCCCCCTTACCCTATTCGCACCTAAAGGGTAA

>SIRBZ21

ATGAATTTGGGCGATCTTAATAAGGTATGGGAAATCAAAGCTTTGAAGCGTAAACCGA  
AAAATGAAAAAGCGAACAACATTCTGGAAAAAATTGCTAAACAGGTTACAGCCATTAT  
GCGTAAACATAACTGGAGAGTTAAACTTCTATCTGAATTTTGCCCAAAAAGAGCACCG  
CTTTTGGGATTGAATGTAGGAGCAGGGATACATGTAAAGCTGAGGCTTCGAAGACCGA  
ACAATGATGAGGAATTTTATCCTTACAATGAACTTTTGGATACTATGCTTCATGAACTTT  
GCCATAATGCTCATGGTCCGCACAATGCCAGTTTTTACAACTATGGGATGAACTTAGA  
AAGGAATGTGAAGATTTAATTGCTAAAGGGATAAGTGGCACAGGAAAAGGGTTTGATC  
TCCATGGAACACAATTACGAGGCCGTACCCACAGCCATCCATGTCGTCTCTTCGGCA  
AACTGCTGCAGCTGCTGCTGAAAATCGAGCACGTCTTAAATCCTTGCTACCATCTGGGC  
CTACACGCCTGGGTGGTGACCATTTCTATTAAGTCTGCACTTACTCCAATTCAAGCTGCA  
GCAATGGCTGCAGAAAGGAGATTACAGGATAATATTTGGTGTGGTTCTGAATTGTGTGA  
ACTATCACACTTAATGAACTTCTGATGCATTACCTGACACTTTACCACTAGGGCATACT  
TCTGATAGATCCAAGCTCTTTAATGGGTTTGATTCACTGTCTTCCAAGGTAACATCTCGA  
AAAAGAAGTCGAGAATCAAATTCTGTATCATCCTCAAAGTCCTTGCATGGCCATTCGGT  
GATTAAGCCAGTATATAAGCCCCTGTCTAACCATGATAAGGAAATTGCTCACAGAGTTG  
GTCAGGTAGAAGGGAAATCTCATAATGTGGCATCAAGAGGTTATACAGAGTCTTTTATT  
GATTTATCTGGCAATTCTTCGAGTTCTACATCAATACATGGCCATGATGACTTACACGGT  
CCCAATGAATCAATGATGTGGGAGTGTTAATGTGCACACTGTTGAACCCACCATTAGC  
TCCTTTGTGCAAAGTATGCCAAACCCAAAAGCCCAAAGACGTGGATGACAGAAATAGT

ATATGGTCGTGCAAATTTTGTACCCTGGATAACAGTCTGAAGTTGGATCAGTGCACAGC  
CTGTGGAGAGTGGAGATATTCTCACGGCCCTCCTGTAGCAACATCAGCGCCCAATCTTG  
GCACTTGA

>SIRBZ22

ATGAATGTATGTGATGTATGTGGAAATCCGAAACAAGAACTAGTTAAGGCTGGGGTGT  
GGTGTTCCTATTTGCACATTTGATAATGAAGATACCACAAATTTATGTGATATGTGTG  
GCGTCCTGCGTAATCCATTGATCAAAGGCGGCGGTGGCAAAGCTAGCGCAGCAACTAG  
CGACAAAGTCGAACAGTCAAATGTTAGTAAAAAGGAAATAGCTGGCGAAGTTAAAAA  
AGAATTGGTTTCTGAAGAGCCTACTAGCTCTTCTGCATCAACAGCGAAGGTTAGACGT  
GATAATATGAAGGATAGAGGTTCTTCTATAAAATCTAGAGGATATCATGGCGTCATGAGC  
AATGTGGGCAATATGTCTGTATCATCAATCCTCGCAATGCGGAGAGTAGAATTGCACC  
TTCAAGATCACAGACTAAACCTCAGAAAATTGTATGCACTGATCAATTAGAAGACAAA  
CTGAACCAGCTAAATCTTGCAATCGTTGGCCATGTTGATTCTGGGAAGTCAACACTGTC  
AGGAAGACTACTACACCTTTTGGGGCAGATATCTCAGAAGGAAATGCACAAATATGAA  
AAAGAGGCCAAGCAGCAAGGAAAAGGGTCCTTTGCTTATGCTTGGGCTTTGGATGAG  
AGTGCTGAGGAAAGAGAGAGAGGAATAACTATGACAGTGGCTGTTGCCTACTTTAACA  
CAAAAAGTTACCGCGTTGTACTGCTTGATTCCCCAGGCCATAGAGACTTTGTCCCAAAT  
ATGATATCAGGTGCAACACAAGCGGATGCTGCCATTCTTGTAGTTGATGCTTCAATAGG  
TGCATTTGAAGCTGGCATTGATGTTAGTGGAGGTCAGACAAGGGAGCATGCACAACCTT  
ATCAAAAGCTTTGGGGTGGATCAGATAATAATTGCTATTAACAAAATGGATGTAGTGGG  
ATACTCCAAAGAACGGTTTGATACAATTAAGAATCAACTAGGAACATTTCTCCGGGCTT  
GTAAGTTTAAAGATTCATTAGTATTGTGGATTCCCCTGAGCGCCATGGAAAACCAAAT  
TTGGTGACAAGTCCTTCTGATGCAAGATTGTTGTCCTGGTTTCAAGGTCCATGCCTTTT  
AGACGCCATAGACTCTCTCCAACCTCCCCAGAGAGATTACTCGAAGCCTATATTAATGC  
CGATATGTGATCTCGTTAAATTACCCTCACAAGGACAGGTGTCAGTATGTGGGAAGTTG  
GAGACAGGAGCTCTTCAAACCTGGAGATAAGGTTCTAGTTATTCCATCAAGAGAAATGG  
CAACTGTGCGTTCTTTGGAACATAATTCTCAGGTTTGTAACAGTGCAAAAGCTGGAGAT  
AATGTCACTGTTAATCTACAAGGTATAGATGTGAATCGTGTAATGGCAGGGGATGTGCT  
GTGCCACCCTGAATATCCTATTGCTGTTACAAATCATTGGAACCTGAAGATTCTTCTCCT  
GGATATTGCTGTTCCAATTTAATTGGGTCTCAGTTGGAATTCATGTACACCATGTAA  
GGAGGCTGCAAGAGTTGTGAGGATTTTGTCTTGCTTGATCCAAAGACTGGAAAGGA  
GACCAAGAAATCACCTAGATGTCTTCTAGCAAAGCAGAATGCTATAATTGAGGTAGTTT  
TGCAAGGGATAATTTGTGTTGAAGAGCATCTAAATGTAAGGGTCTTGGAAGGGTGTC  
CCTCAGAGCATCAGGAAGAACCATCGCTCTTGGTCTTGACTAGAGTTCTAGAGAAG  
AAGGAATAG
