# Supplementary material
Source: MDPI journal article supplement (https://www.mdpi.com/2311-7524/8/11/985)
Supplement: s1 [file s1]

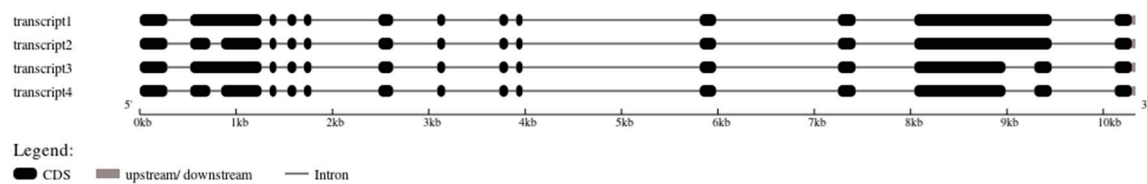

Figure S1 Gene structure of different transcripts of *SIRBZ15*

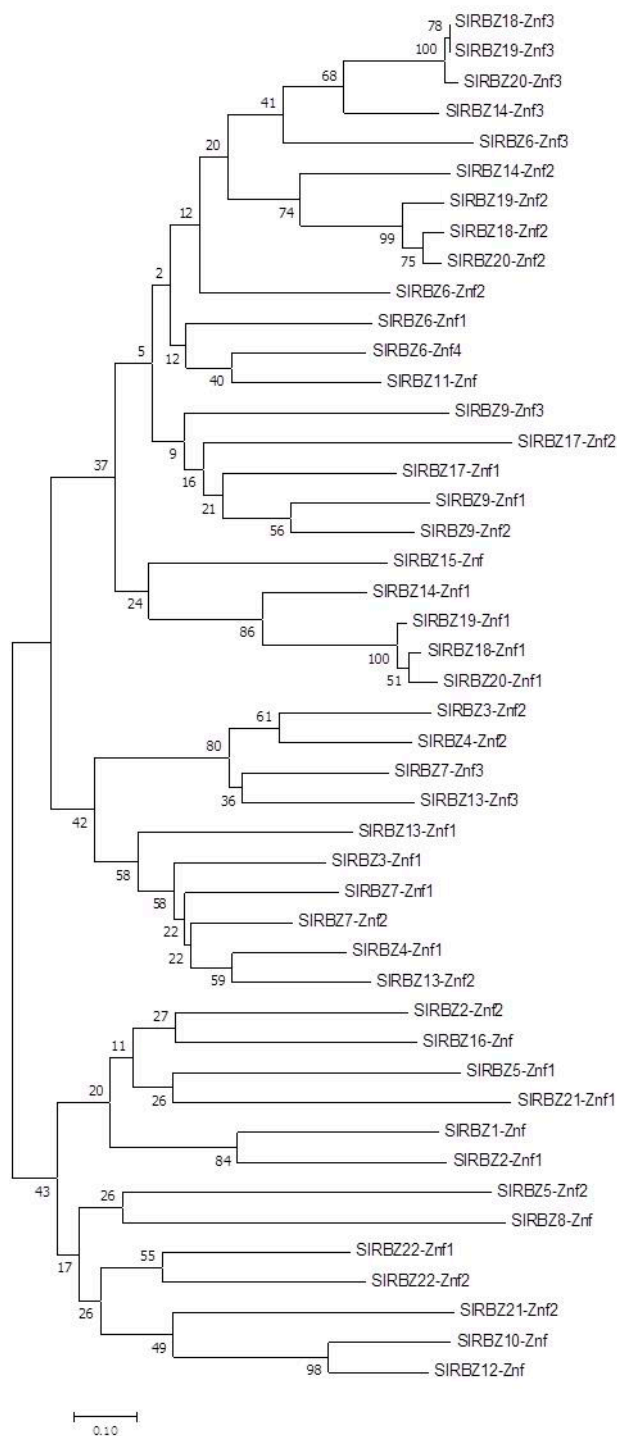

Figure S2 Phylogenetic tree of tomato RanBP2 zinc finger domains

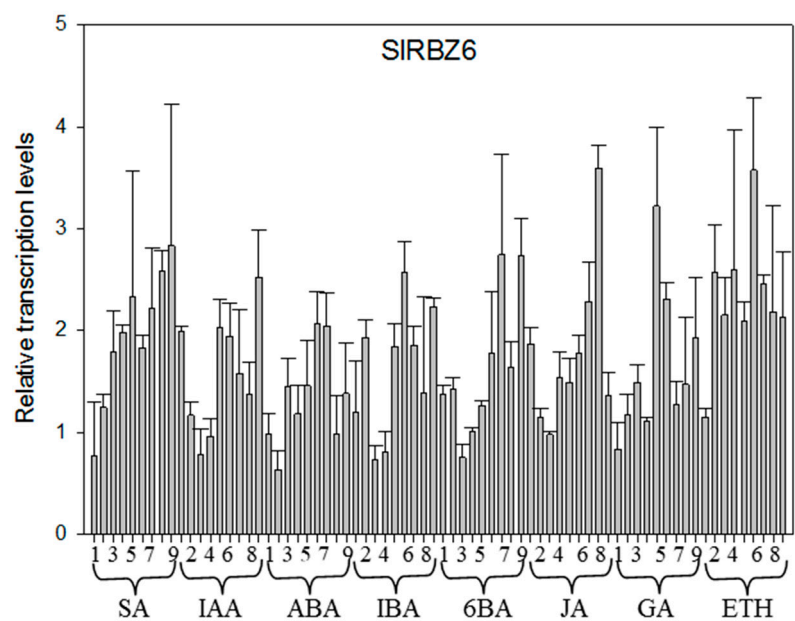

Figure S3 Expression profiles of *SIRBZ6* under exogenous phytohormone treatments
