# Supplementary material
Source: MDPI journal article supplement (https://www.mdpi.com/2311-7524/8/11/985)
Supplement: s1 [file s1]

Archive with 6 entries (6 files):
- Figure S1-S3.pdf
- File S1.pdf
- File S2.pdf
- Table S1.xls
- Table S2.xls
- Table S3.xlsx
