# Supplementary material
Source: MDPI journal article supplement (https://www.mdpi.com/2311-7524/8/11/985)
Supplement: s1 [file s1 › Table S1.xls]

## Sheet: Sheet1
Table S1 Primers used in this study.
	For Real-Time PCR		For CDS
Gene	Forward primer sequence (5′–3′)	Reverse primer sequence (5′–3′)	Forward primer sequence (5′–3′)	Reverse primer sequence (5′–3′)
SlRBZ1			GCATGGATTCTGATCATGAATT	GCTCAATCTTCAATGCACATTTGA
SlRBZ2	GCATGTGGATGGAAGCGACA	GGTTGTGCTGCTCATCCCAG	AGCAGCAAACGGACCAACTC	CTACTCCCAAAGCCTACGCATC
SlRBZ3	TGGGTATTGACGGGAGCACT	CCGCAGCTCACTTCAACCAA	GAATGGTCTGTATTGGCTCAAACTA	TTACCCAACTACCAATAGAGCCC
SlRBZ4	CCGAAGTTGGTGGTGATGGG	CTTCTCCTGCTGCTTCCACG	CAGTTCTCCTTCTTCCTTTCTCCAT	GACTTCTGATAACCCTTCCATTTCC
SlRBZ5			GCATGGTTTCAATTTCAAA	CTACTGAGGAGAGATCTCCA
SlRBZ6	GCAGCCTCGTCTCCTTGTTG	ACCAGTGCAGATCCAATCGC	GCTCTAGAATGGGACGAGAAGGAGATTG	GCGGTACC CTATGCAACAGTAACAGGTTGAGT
SlRBZ7	CAAGAGCAGCGTCCCAAGAG	TGGGACGTTCACAAGTGCAC	AACCCTCTACTTTCTTCAATCTCAG	CTACATTAGTAAGGCTTTGTCCAG
SlRBZ8			GCATGATCTTAGTGCAAAAATGT	GCTCAACAAGAAAAATTACAAGA
SlRBZ9	GGTCTGGTGCTCCCTCTTCA	TGTAAGGAGGTGGAGCGGAG	ATGTCTCAGGTTGATAACAGAAA	TCCACAAGGACCAGAAAATA
SlRBZ10	TGCTATGTCCCAGGGCATCA	GTCGGTACCAACAGCCCATG	GCTACCCGACTGAATGTGCC	AAGCCAATCTTCCTTGTCATCTAC
SlRBZ11	TGGTGATTGGATGTGCACGG	CCAGGATTGCGATGATGGGG	ACGGAGTGCGGCATAGAGAG	ATCGCAACAACAATACCACAAGA
SlRBZ12			ATGGAGAGAGGAAGAGGACA	GCTTATCTACCAAATCGTTGAA
SlRBZ13	GTGCTTGCAAGTTGTGGCTG	GCCCTCTCACAACTTCCCCT	TTAAATCCCAAACCTCTTCT	CGAGTCCCTTCACTAACTTCT
SlRBZ14	TGATGTAAGGCCCGGTGACT	CTGCTACCACCACCACAACC	GTATTACATAATGTGACCGAC	TTAAACTGCAACACCTGAAC
SlRBZ15	ATCACGGCTGACAGGGCTAT	CCAGTCCGGCTCTATGTCCA	TTGAGGAGTCCAGTAAAGGG	TCTAACGGCACAACGAAAAA
SlRBZ16			ATGGCATCGGAGGATGAATT	TCAACGACGCTGCTGGCACAT
SlRBZ17			ATGGCAAGCTATTCAGGGAAA	TCAATGACGATACTTGTTCCGCT
SlRBZ18	CGGAGTAGGAATGATGGCACC	CACGTCCCTCAATACAATTCACTT	AGAAAATGAGCAGAGATGGA	AAAACAAGAGTGAAGAAGGG
SlRBZ19	AAAGAAGATCATGAGTAGGGAAGGA	TCAGCCGATGTTGCGTATTTA	CCTAGAGATTTTGGTGAGCC	GAAAAGTGATGTTGGAAAGT
SlRBZ20	CGAGAGTTCAGTTCTTCAAATCC	TGGAACGCGAGGAAATTTAG	CCAGATTTACGGACAGAA	TTGAACACTAACCAGGGA
SlRBZ21			ATGAATTTGGGCGATCTTAATA	TCAAGTGCCAAGATTGGGCGCT
SlRBZ22			ATGAATGTATGTGATGTATGT	CTATTCCTTCTTCTCTAGAACT
ACTIN	TGTGTTGGACTCTGGTGATGGTGT	TCACGTCCCTGACAATTTCTCGCT	GATGGCAGACGGAGAGGATATTCA	GCCTTTGCAATCCACATCTGCTG
