# Supplementary material
Source: MDPI journal article supplement (https://www.mdpi.com/2311-7524/8/11/985)
Supplement: s1 [file s1 › Table S2.xls]

## Sheet: Sheet1
Table S2 Multiple Sequence Alignments were carried out using the nucleotide (nt)a and amino acid (aa)b sequences of SlRBZ genes.
a
nt（%）	SlRBZ1	SlRBZ2	SlRBZ3	SlRBZ4	SlRBZ5	SlRBZ6	SlRBZ7	SlRBZ8	SlRBZ9	SlRBZ10	SlRBZ11	SlRBZ12	SlRBZ13	SlRBZ14	SlRBZ15	SlRBZ16	SlRBZ17	SlRBZ18	SlRBZ19	SlRBZ20	SlRBZ21	SlRBZ22
SlRBZ1	-	-	-	-	-	-	-	-	-	-	-	-	-	-	-	-	-	-	-	-	-	-
SlRBZ2	37.17	-	-	-	-	-	-	-	-	-	-	-	-	-	-	-	-	-	-	-	-	-
SlRBZ3	34.25	33.91	-	-	-	-	-	-	-	-	-	-	-	-	-	-	-	-	-	-	-	-
SlRBZ4	35.03	35.92	33.32	-	-	-	-	-	-	-	-	-	-	-	-	-	-	-	-	-	-	-
SlRBZ5	36.32	36.93	32.6	34.57	-	-	-	-	-	-	-	-	-	-	-	-	-	-	-	-	-	-
SlRBZ6	35.27	34.87	35.56	36.91	36.14	-	-	-	-	-	-	-	-	-	-	-	-	-	-	-	-	-
SlRBZ7	33.79	33.64	36.52	38.68	34.26	37.08	-	-	-	-	-	-	-	-	-	-	-	-	-	-	-	-
SlRBZ8	33.07	38.7	32.36	32.73	36.19	33.69	33.33	-	-	-	-	-	-	-	-	-	-	-	-	-	-	-
SlRBZ9	35.03	34.66	36.62	32.32	35.53	36.7	35.31	35.98	-	-	-	-	-	-	-	-	-	-	-	-	-	-
SlRBZ10	36.62	37.07	36.26	35.2	37.4	38.16	35.37	37.8	36.63	-	-	-	-	-	-	-	-	-	-	-	-	-
SlRBZ11	35.66	36.64	34.53	34.74	35.4	39.16	34.42	33.27	36.49	38.01	-	-	-	-	-	-	-	-	-	-	-	-
SlRBZ12	35.48	37.28	36.11	36.16	37.28	40.12	34.12	39.89	39.16	72.08	37.02	-	-	-	-	-	-	-	-	-	-	-
SlRBZ13	35.55	33.17	31.32	39.62	36.23	34.77	39.03	33.18	37.05	34.91	34.56	34.48	-	-	-	-	-	-	-	-	-	-
SlRBZ14	38.06	35.92	39.41	35.76	39.76	39.64	38	41.14	39.73	34.93	40	34.9	36.13	-	-	-	-	-	-	-	-	-
SlRBZ15	33.29	38	32.8	30.27	32.06	37.49	36.33	31.5	35.39	34.05	36.63	36.13	33.43	39.37	-	-	-	-	-	-	-	-
SlRBZ16	43.36	36.8	32.11	30.47	35.62	38.38	35.78	34.06	35.75	38.79	34.08	36.85	32.98	36.25	31.85	-	-	-	-	-	-	-
SlRBZ17	33.21	36.17	32.94	33.36	35.43	36.94	34.73	34.43	36.01	36.9	35.61	36.84	35.19	41.18	33.6	34.77	-	-	-	-	-	-
SlRBZ18	43.47	39.13	46.02	39.36	42.48	51.08	44.07	42.27	46.07	41.88	43.63	39.85	40.93	58.06	40.59	40.25	39.63	-	-	-	-	-
SlRBZ19	41.24	36.34	42.8	35.62	39.88	44.69	40.21	39.53	44.98	39.34	42.89	38.32	40.16	57.07	40.5	37.11	35.86	85.46	-	-	-	-
SlRBZ20	35.82	33.28	37.7	35.74	39.19	42.42	35.61	36.52	38.93	35.49	39.36	35.97	34.8	54.95	35.25	33.19	32.83	79.37	68.76	-	-	-
SlRBZ21	33.61	35.84	33.71	32.74	35.47	36.56	32.97	31.22	34.86	35.16	34.23	37.55	35.83	35.13	33.47	36.16	34.49	45.65	41.18	36.92	-	-
SlRBZ22	34.8	34.76	32.03	30.45	32.12	36.83	33.48	33.9	34.95	34.16	31.72	34.34	33.17	36.87	31.72	31.63	33.79	41.93	42.05	37.27	31.82	-
b
aa（%）	SlRBZ1	SlRBZ2	SlRBZ3	SlRBZ4	SlRBZ5	SlRBZ6	SlRBZ7	SlRBZ8	SlRBZ9	SlRBZ10	SlRBZ11	SlRBZ12	SlRBZ13	SlRBZ14	SlRBZ15	SlRBZ16	SlRBZ17	SlRBZ18	SlRBZ19	SlRBZ20	SlRBZ21	SlRBZ22
SlRBZ1	-	-	-	-	-	-	-	-	-	-	-	-	-	-	-	-	-	-	-	-	-	-
SlRBZ2	16.67	-	-	-	-	-	-	-	-	-	-	-	-	-	-	-	-	-	-	-	-	-
SlRBZ3	14.62	20.1	-	-	-	-	-	-	-	-	-	-	-	-	-	-	-	-	-	-	-	-
SlRBZ4	15.96	21.95	25.49	-	-	-	-	-	-	-	-	-	-	-	-	-	-	-	-	-	-	-
SlRBZ5	32.43	33.33	17.2	14.18	-	-	-	-	-	-	-	-	-	-	-	-	-	-	-	-	-	-
SlRBZ6	14.89	14.08	17.13	13.12	13.77	-	-	-	-	-	-	-	-	-	-	-	-	-	-	-	-	-
SlRBZ7	18.26	21.51	33.98	38.95	19.77	18.33	-	-	-	-	-	-	-	-	-	-	-	-	-	-	-	-
SlRBZ8	13.89	15.7	13.02	11.07	16.28	12.89	13.91	-	-	-	-	-	-	-	-	-	-	-	-	-	-	-
SlRBZ9	16.3	22.73	18.75	23.03	16.67	22.08	19.88	15.54	-	-	-	-	-	-	-	-	-	-	-	-	-	-
SlRBZ10	11.83	14.41	14.72	18.4	16.09	14.42	14.6	7.41	10.88	-	-	-	-	-	-	-	-	-	-	-	-	-
SlRBZ11	10.67	16.13	13.44	15.72	14.13	21.54	18.09	12.26	15.17	11.76	-	-	-	-	-	-	-	-	-	-	-	-
SlRBZ12	9.76	13.95	14.04	16.6	12.64	13.04	13.93	4.55	11.11	60.06	11.11	-	-	-	-	-	-	-	-	-	-	-
SlRBZ13	13.24	21.54	28.24	36.56	20.14	13.89	38.13	14.66	20.61	17.13	14.41	14.73	-	-	-	-	-	-	-	-	-	-
SlRBZ14	12.5	22.41	14.81	20.24	13.33	34.9	23.96	10.71	22.73	15.22	26.52	8.75	18.18	-	-	-	-	-	-	-	-	-
SlRBZ15	17.11	12.07	14.36	11.7	15.46	22.87	15.05	21	20.81	12.42	19.08	10.81	11.34	22.89	-	-	-	-	-	-	-	-
SlRBZ16	49	13.85	15.73	14.93	29.17	12.61	17.37	13.08	13.12	13.04	19.39	9.94	11.47	13.98	18.87	-	-	-	-	-	-	-
SlRBZ17	13.77	6.02	10.87	11.68	0	21.88	9.7	11.54	24.55	11.88	13.33	7.69	12.77	32.26	19.39	13.91	-	-	-	-	-	-
SlRBZ18	18.97	17.31	19.51	22.89	15.91	35.77	19.54	13.7	23.31	19.05	26.17	15.28	16.13	50	23.24	19.12	28.28	-	-	-	-	-
SlRBZ19	18.97	15.38	17.95	25	16.67	39.85	19.54	13.04	25.76	20.24	27.18	16.67	15.73	49.65	23.91	17.65	27.27	87.23	-	-	-	-
SlRBZ20	16.9	17.31	18.99	22.22	16.67	37.59	20	15.94	21.83	16.09	28.16	12	16.67	48.23	20.99	17.07	23.58	85.11	85.11	-	-	-
SlRBZ21	15.69	16.56	14.97	14.95	29.55	13.84	15.49	14.45	16.44	16.77	18.49	14.12	12.76	14.49	18.85	18.05	13.43	9.73	11.5	11.2	-	-
SlRBZ22	23.26	23.81	20.73	15.79	14.78	15.7	25	17.09	16.83	17.02	12.94	18.09	17.33	17.86	17.02	20.63	8.11	16.33	17.78	17.78	23.15	-
