# Supplementary material
Source: MDPI journal article supplement (https://www.mdpi.com/2311-7524/8/11/985)
Supplement: s1 [file s1 › Table S3.xlsx]

## Sheet: Sheet1
Table S3 A total of 94 cis-elements were identified by PlantCARE programe in the promoter regions of SlRBZ genes.
Cis-elements	Function	Type of cis-elements	found in members of SlRBZ genes
TATA-box	core promoter element around -30 of transcription start	Hormone responsive	RBZ1	RBZ2	RBZ3	RBZ4	RBZ5	RBZ6	RBZ7	RBZ8	RBZ9	RBZ10	RBZ11	RBZ12	RBZ13	RBZ14	RBZ15	RBZ16	RBZ17	RBZ18	RBZ19	RBZ20	RBZ21	RBZ22
CAAT-box	common cis-acting element in promoter and enhancer regions	N/A	RBZ1	RBZ2	RBZ3	RBZ4	RBZ5	RBZ6	RBZ7	RBZ8	RBZ9	RBZ10	RBZ11	RBZ12	RBZ13	RBZ14	RBZ15	RBZ16	RBZ17	RBZ18	RBZ19	RBZ20	RBZ21	RBZ22
AT~TATA-box	N/A	N/A	RBZ1	RBZ3	RBZ4	RBZ5	RBZ6	RBZ7	RBZ8	RBZ9	RBZ10	RBZ11	RBZ12	RBZ13	RBZ14	RBZ15	RBZ16	RBZ17	RBZ18	RBZ19	RBZ20	RBZ21	RBZ22
Unnamed__4	N/A	N/A	RBZ2	RBZ3	RBZ4	RBZ5	RBZ6	RBZ7	RBZ8	RBZ9	RBZ10	RBZ11	RBZ12	RBZ13	RBZ14	RBZ15	RBZ16	RBZ17	RBZ18	RBZ19	RBZ20	RBZ21	RBZ22
MYC	N/A	Hormone responsive	RBZ1	RBZ2	RBZ3	RBZ4	RBZ7	RBZ8	RBZ9	RBZ10	RBZ12	RBZ13	RBZ14	RBZ15	RBZ16	RBZ17	RBZ18	RBZ19	RBZ20	RBZ21	RBZ22
ARE	cis-acting regulatory element essential for the anaerobic induction	Stress Response	RBZ1	RBZ2	RBZ3	RBZ4	RBZ6	RBZ7	RBZ8	RBZ9	RBZ10	RBZ13	RBZ15	RBZ16	RBZ17	RBZ18	RBZ19	RBZ20	RBZ21	RBZ22
Box 4	part of a conserved DNA module involved in light responsiveness	Light responsive	RBZ1	RBZ2	RBZ3	RBZ6	RBZ7	RBZ8	RBZ9	RBZ10	RBZ11	RBZ12	RBZ13	RBZ14	RBZ15	RBZ16	RBZ17	RBZ20	RBZ21
MYB	N/A	N/A	RBZ1	RBZ2	RBZ3	RBZ4	RBZ7	RBZ8	RBZ9	RBZ10	RBZ12	RBZ13	RBZ15	RBZ17	RBZ18	RBZ19	RBZ20	RBZ21	RBZ22
ABRE	cis-acting element involved in the abscisic acid responsivenes	Hormone responsive	RBZ2	RBZ3	RBZ7	RBZ8	RBZ9	RBZ10	RBZ11	RBZ12	RBZ14	RBZ15	RBZ16	RBZ17	RBZ18	RBZ19	RBZ20	RBZ21
STRE	N/A	Stress Response	RBZ1	RBZ2	RBZ4	RBZ5	RBZ6	RBZ7	RBZ11	RBZ12	RBZ14	RBZ15	RBZ16	RBZ17	RBZ18	RBZ20	RBZ21	RBZ22
Unnamed__1	60K protein binding site	N/A	RBZ1	RBZ2	RBZ3	RBZ7	RBZ8	RBZ11	RBZ12	RBZ13	RBZ14	RBZ15	RBZ16	RBZ17	RBZ18	RBZ21	RBZ22
TCT-motif	part of a light responsive element	Light responsive	RBZ5	RBZ7	RBZ8	RBZ9	RBZ10	RBZ11	RBZ12	RBZ13	RBZ15	RBZ16	RBZ17	RBZ18	RBZ19	RBZ21
G-box	cis-acting regulatory element involved in light responsiveness	Light responsive	RBZ2	RBZ3	RBZ7	RBZ8	RBZ9	RBZ10	RBZ12	RBZ15	RBZ16	RBZ17	RBZ18	RBZ19	RBZ20	RBZ21
MYB-like sequence	N/A	N/A	RBZ1	RBZ2	RBZ3	RBZ7	RBZ8	RBZ10	RBZ13	RBZ17	RBZ18	RBZ19	RBZ20	RBZ21	RBZ22
AAGAA-motif	N/A	Plant growth and development	RBZ2	RBZ3	RBZ4	RBZ6	RBZ7	RBZ9	RBZ13	RBZ16	RBZ17	RBZ18	RBZ19	RBZ20	RBZ22
WUN-motif	wound responsiveness	Stress Response	RBZ1	RBZ2	RBZ3	RBZ6	RBZ8	RBZ9	RBZ10	RBZ11	RBZ12	RBZ13	RBZ14	RBZ15	RBZ17
TATA			RBZ1	RBZ4	RBZ5	RBZ6	RBZ7	RBZ9	RBZ12	RBZ13	RBZ14	RBZ20	RBZ21	RBZ22
ERE	ethephon responsive elements	Hormone responsive	RBZ1	RBZ3	RBZ5	RBZ6	RBZ7	RBZ8	RBZ11	RBZ12	RBZ13	RBZ14	RBZ16	RBZ21
Myb-binding site	N/A	N/A	RBZ1	RBZ2	RBZ4	RBZ9	RBZ14	RBZ15	RBZ17	RBZ18	RBZ19	RBZ20	RBZ21	RBZ22
ABRE3a	N/A	N/A	RBZ3	RBZ7	RBZ8	RBZ9	RBZ12	RBZ15	RBZ16	RBZ17	RBZ18	RBZ20	RBZ21
ABRE4	N/A	N/A	RBZ3	RBZ7	RBZ8	RBZ9	RBZ12	RBZ15	RBZ16	RBZ17	RBZ18	RBZ20	RBZ21
MBS	MYB binding site involved in drought-inducibility	Stress Response	RBZ2	RBZ5	RBZ7	RBZ8	RBZ9	RBZ10	RBZ13	RBZ17	RBZ18	RBZ19	RBZ22
GT1-motif	light responsive element	Light responsive	RBZ1	RBZ2	RBZ3	RBZ8	RBZ13	RBZ15	RBZ16	RBZ17	RBZ18	RBZ20	RBZ21
W box	N/A	N/A	RBZ9	RBZ10	RBZ12	RBZ14	RBZ15	RBZ16	RBZ17	RBZ18	RBZ21	RBZ22
TCA-element	cis-acting element involved in salicylic acid responsiveness	Hormone responsive	RBZ1	RBZ3	RBZ7	RBZ8	RBZ12	RBZ14	RBZ15	RBZ17	RBZ21	RBZ22
as-1	N/A	Plant growth and development	RBZ1	RBZ2	RBZ3	RBZ4	RBZ6	RBZ7	RBZ10	RBZ13	RBZ14	RBZ15
CGTCA-motif	cis-acting regulatory element involved in the MeJA-responsiveness	Hormone responsive	RBZ1	RBZ2	RBZ3	RBZ4	RBZ6	RBZ7	RBZ10	RBZ13	RBZ14	RBZ15
TGACG-motif	cis-acting regulatory element involved in the MeJA-responsiveness	Hormone responsive	RBZ1	RBZ2	RBZ3	RBZ4	RBZ6	RBZ7	RBZ10	RBZ13	RBZ14	RBZ15
TC-rich repeats	cis-acting element involved in defense and stress responsiveness	Stress Response	RBZ2	RBZ9	RBZ11	RBZ13	RBZ15	RBZ16	RBZ17	RBZ18	RBZ21	RBZ22
Myb			RBZ2	RBZ5	RBZ8	RBZ10	RBZ12	RBZ13	RBZ17	RBZ18	RBZ20	RBZ22
AE-box	part of a module for light response	Light responsive	RBZ4	RBZ7	RBZ10	RBZ12	RBZ14	RBZ15	RBZ16	RBZ17	RBZ22
WRE3	N/A	Stress Response	RBZ6	RBZ7	RBZ9	RBZ11	RBZ12	RBZ18	RBZ19	RBZ21	RBZ22
MYB recognition site	N/A	N/A	RBZ2	RBZ7	RBZ9	RBZ11	RBZ13	RBZ18	RBZ19	RBZ20	RBZ22
G-Box	cis-acting regulatory element involved in light responsiveness	Light responsive	RBZ2	RBZ7	RBZ8	RBZ11	RBZ14	RBZ15	RBZ16	RBZ17	RBZ19
Myc	N/A	Hormone responsive	RBZ1	RBZ8	RBZ11	RBZ12	RBZ15	RBZ16	RBZ20	RBZ21
GATA-motif	part of a light responsive element	Light responsive	RBZ3	RBZ6	RBZ8	RBZ10	RBZ17	RBZ19	RBZ21	RBZ22
I-box	part of a light responsive element	Light responsive	RBZ1	RBZ9	RBZ10	RBZ13	RBZ16	RBZ20	RBZ21	RBZ22
CAT-box	cis-acting regulatory element related to meristem expression	Plant growth and development	RBZ2	RBZ4	RBZ9	RBZ12	RBZ15	RBZ17	RBZ20
circadian	cis-acting regulatory element involved in circadian control	Plant growth and development	RBZ1	RBZ4	RBZ8	RBZ14	RBZ17	RBZ19	RBZ21
Unnamed__6			RBZ1	RBZ4	RBZ8	RBZ12	RBZ13	RBZ16	RBZ17
LTR	cis-acting element involved in low-temperature responsiveness	Stress Response	RBZ3	RBZ8	RBZ10	RBZ12	RBZ15	RBZ16	RBZ19
GARE-motif	gibberellin-responsive element	Hormone responsive	RBZ1	RBZ15	RBZ17	RBZ18	RBZ20	RBZ21
CTAG-motif			RBZ7	RBZ14	RBZ17	RBZ18	RBZ21	RBZ22
P-box	gibberellin-responsive element	Hormone responsive	RBZ3	RBZ6	RBZ12	RBZ16	RBZ20	RBZ22
TCA			RBZ2	RBZ3	RBZ8	RBZ9	RBZ16	RBZ17
chs-CMA1a	part of a light responsive element	Light responsive	RBZ1	RBZ4	RBZ8	RBZ16	RBZ21
GA-motif	part of a light responsive element	Light responsive	RBZ3	RBZ4	RBZ5	RBZ16	RBZ21
TCCC-motif	part of a light responsive element	Light responsive	RBZ4	RBZ10	RBZ11	RBZ16	RBZ21
Unnamed__2			RBZ8	RBZ11	RBZ18	RBZ20	RBZ21
AT1-motif	part of a light responsive module	Light responsive	RBZ6	RBZ9	RBZ11	RBZ14
AuxRR-core	cis-acting regulatory element involved in auxin responsiveness	Hormone responsive	RBZ15	RBZ18	RBZ20	RBZ21
CCAAT-box	MYBHv1 binding site	Plant growth and development	RBZ2	RBZ13	RBZ14	RBZ22
DRE core			RBZ3	RBZ5	RBZ11	RBZ22
LAMP-element	part of a light responsive element	Light responsive	RBZ2	RBZ14	RBZ20	RBZ22
TATC-box	cis-acting element involved in gibberellin-responsiveness	Hormone responsive	RBZ4	RBZ10	RBZ17	RBZ21
O2-site	cis-acting regulatory element involved in zein metabolism regulation	Plant growth and development	RBZ8	RBZ10	RBZ13	RBZ18
Gap-box	part of a light responsive element	Light responsive	RBZ12	RBZ18	RBZ21
TGA-element	auxin-responsive element	Hormone responsive	RBZ2	RBZ15	RBZ22
MRE	MYB binding site involved in light responsiveness	Light responsive	RBZ4	RBZ7	RBZ8
AP-1			RBZ14	RBZ20
AT~ABRE		Hormone responsive	RBZ3	RBZ18
ATC-motif	part of a conserved DNA module involved in light responsiveness	Light responsive	RBZ3	RBZ19
box S			RBZ14	RBZ15
chs-CMA2a	part of a light responsive element	Light responsive	RBZ4	RBZ12
GCN4_motif	cis-regulatory element involved in endosperm expression	Plant growth and development	RBZ9	RBZ10
Sp1	light responsive element	Light responsive	RBZ6	RBZ21
Unnamed__10			RBZ18	RBZ21
Unnamed__12			RBZ18	RBZ21
Unnamed__14			RBZ18	RBZ21
Unnamed__8			RBZ18	RBZ21
ACE	cis-acting element involved in light responsiveness	Light responsive	RBZ4	RBZ14
ATCT-motif	part of a conserved DNA module involved in light responsiveness	Light responsive	RBZ8	RBZ11
MBSI	MYB binding site involved in flavonoid biosynthetic genes regulation	Stress Response	RBZ1
chs-Unit 1 m1	part of a light responsive element	Light responsive	RBZ6
ACTCATCCT sequence			RBZ8
Box II			RBZ8
LS7	part of a light responsive element	Light responsive	RBZ9
3-AF1 binding site	light responsive element	Light responsive	RBZ9
HD-Zip 1	element involved in differentiation of the palisade mesophyll cells	N/A	RBZ10
AC-I	N/A	N/A	RBZ10
GC-motif	enhancer-like element involved in anoxic specific inducibility	Stress Response	RBZ11
MSA-like	cis-acting element involved in cell cycle regulation	N/A	RBZ11
AT-rich sequence	element for maximal elicitor-mediated activation (2copies)		RBZ13
CARE			RBZ14
F-box	N/A	N/A	RBZ15
HMG-TATA-region	cis-acting regulatory element		RBZ16
3-AF3 binding site	part of a conserved DNA module array (CMA3)		RBZ17
AT-rich element	binding site of AT-rich DNA binding protein (ATBP-1)	Plant growth and development	RBZ18
CCGTCC motif	cis-acting regulatory element related to meristem specific activation	N/A	RBZ18
RY-element	cis-acting regulatory element involved in seed-specific regulation	Plant growth and development	RBZ18
A-box	cis-acting regulatory element	N/A	RBZ18
AAAC-motif	light responsive element	Light responsive	RBZ22

## Sheet: Sheet2
				Plant growth and development									Phytohormone responseness													Stress responseness
	Plant growth and development	Phytohormone responseness	Stress Responseness	AAGAA-motif	as-1	AT-rich element	CAT-box	CCAAT-box	circadian	GCN4_motif	O2-site	RY-element	ABRE	AT~ABRE	AuxRR-core	CGTCA-motif	ERE	GARE-motif	Myc	MYC	P-box	TATC-box	TCA-element	TGA-element	TGACG-motif	ARE	LTR	MBS	MBSI	STRE	TC-rich repeats	WRE3	WUN-motif	GC-motif
SlRBZ1	2	12	8	0	1	0	0	0	1	0	0	0	0	0	0	1	5	1	1	1	0	0	2	0	1	2	0	0	1	1	0	0	4	0
SlRBZ2	4	9	6	1	1	0	1	1	0	0	0	0	2	0	0	1	0	0	0	3	0	0	0	2	1	1	0	1	0	1	2	0	1	0
SlRBZ3	2	16	4	1	1	0	0	0	0	0	0	0	2	1	0	1	5	0	0	4	1	0	1	0	1	2	1	0	0	0	0	0	1	0
SlRBZ4	5	6	2	2	1	0	1	0	1	0	0	0	0	0	0	1	0	0	0	3	0	1	0	0	1	1	0	0	0	1	0	0	0	0
SlRBZ5	0	2	2	0	0	0	0	0	0	0	0	0	0	0	0	0	2	0	0	0	0	0	0	0	0	0	0	1	0	1	0	0	0	0
SlRBZ6	2	4	6	1	1	0	0	0	0	0	0	0	0	0	0	1	1	0	0	0	1	0	0	0	1	2	0	0	0	1	0	2	1	0
SlRBZ7	3	9	7	2	1	0	0	0	0	0	0	0	2	0	0	1	2	0	0	2	0	0	1	0	1	1	0	3	0	1	0	2	0	0
SlRBZ8	1	19	5	0	0	0	0	0	0	0	1	0	7	0	0	0	3	0	1	7	0	0	1	0	0	2	1	1	0	0	0	0	1	0
SlRBZ9	5	10	5	3	0	0	1	0	0	1	0	0	1	0	0	0	0	0	0	9	0	0	0	0	0	1	0	1	0	0	1	1	1	0
SlRBZ10	5	9	6	0	3	0	0	0	0	1	1	0	1	0	0	3	0	0	0	1	0	1	0	0	3	2	1	1	0	0	0	0	2	0
SlRBZ11	0	5	6	0	0	0	0	0	0	0	0	0	1	0	0	0	2	0	2	0	0	0	0	0	0	0	0	0	0	2	1	1	1	1
SlRBZ12	1	12	8	0	0	0	1	0	0	0	0	0	2	0	0	0	2	0	2	2	1	0	3	0	0	0	2	0	0	3	0	1	2	0
SlRBZ13	7	12	5	2	3	0	0	1	0	0	1	0	0	0	0	3	4	0	0	2	0	0	0	0	3	1	0	1	0	0	1	0	2	0
SlRBZ14	4	11	3	0	2	0	0	1	1	0	0	0	2	0	0	2	2	0	0	2	0	0	1	0	2	0	0	0	0	1	0	0	2	0
SlRBZ15	2	13	10	0	1	0	1	0	0	0	0	0	2	0	1	1	0	1	1	4	0	0	1	1	1	4	1	0	0	1	1	0	3	0
SlRBZ16	1	11	5	1	0	0	0	0	0	0	0	0	3	0	0	0	2	0	1	4	1	0	0	0	0	1	1	0	0	2	1	0	0	0
SlRBZ17	5	11	4	1	0	0	3	0	1	0	0	0	3	0	0	0	0	1	0	5	0	1	1	0	0	1	0	1	0	1	1	0	0	0
SlRBZ18	5	12	10	1	0	1	0	0	0	0	2	1	4	1	1	0	0	1	0	5	0	0	0	0	0	1	0	1	0	4	2	2	0	0
SlRBZ19	4	6	9	3	0	0	0	0	1	0	0	0	3	0	0	0	0	0	0	3	0	0	0	0	0	5	2	1	0	0	0	1	0	0
SlRBZ20	2	13	5	1	0	0	1	0	0	0	0	0	1	0	2	0	0	1	2	6	1	0	0	0	0	1	0	0	0	4	0	0	0	0
SlRBZ21	1	11	8	0	0	0	0	0	1	0	0	0	1	0	1	0	1	1	1	4	0	1	1	0	0	3	0	0	0	2	2	1	0	0
SlRBZ22	2	13	8	1	0	0	0	1	0	0	0	0	0	0	0	0	0	0	0	8	3	0	1	1	0	3	0	2	0	1	1	1	0	0
